# Supplementary material for: Whole-genome resequencing reveals signatures of selection and timing of duck domestication
Source: PubMed Central journal article supplement (PMC6007426; doi:10.1093/gigascience/giy027), 2018-04-09

## Whole-genome resequencing reveals signatures of selection and timing of duck domestication

--Manuscript Draft--

|                                                      |                                                                                                                                                                                                                                                                                                                                                                                                                                                                                                                                                                                                                                                                                                                                                                                                                                                                                                                                                                                                                                                                                                       |                   |
|------------------------------------------------------|-------------------------------------------------------------------------------------------------------------------------------------------------------------------------------------------------------------------------------------------------------------------------------------------------------------------------------------------------------------------------------------------------------------------------------------------------------------------------------------------------------------------------------------------------------------------------------------------------------------------------------------------------------------------------------------------------------------------------------------------------------------------------------------------------------------------------------------------------------------------------------------------------------------------------------------------------------------------------------------------------------------------------------------------------------------------------------------------------------|-------------------|
| <b>Manuscript Number:</b>                            | GIGA-D-17-00301                                                                                                                                                                                                                                                                                                                                                                                                                                                                                                                                                                                                                                                                                                                                                                                                                                                                                                                                                                                                                                                                                       |                   |
| <b>Full Title:</b>                                   | Whole-genome resequencing reveals signatures of selection and timing of duck domestication                                                                                                                                                                                                                                                                                                                                                                                                                                                                                                                                                                                                                                                                                                                                                                                                                                                                                                                                                                                                            |                   |
| <b>Article Type:</b>                                 | Research                                                                                                                                                                                                                                                                                                                                                                                                                                                                                                                                                                                                                                                                                                                                                                                                                                                                                                                                                                                                                                                                                              |                   |
| <b>Funding Information:</b>                          | Beijing Innovation Team of the Modern Agro-industry Technology Research System (BAIC04-2017)                                                                                                                                                                                                                                                                                                                                                                                                                                                                                                                                                                                                                                                                                                                                                                                                                                                                                                                                                                                                          | Prof. Lujiang Qu  |
|                                                      | European Research Council (680951)                                                                                                                                                                                                                                                                                                                                                                                                                                                                                                                                                                                                                                                                                                                                                                                                                                                                                                                                                                                                                                                                    | Dr. Judith E Mank |
|                                                      | Wolfson Merit Award                                                                                                                                                                                                                                                                                                                                                                                                                                                                                                                                                                                                                                                                                                                                                                                                                                                                                                                                                                                                                                                                                   | Dr. Judith E Mank |
| <b>Abstract:</b>                                     | <p>The genetic basis of animal domestication remains poorly understood, and systems with substantial phenotypic differences between wild and domestic populations are useful for elucidating the genetic basis of adaptation to new environments as well as the genetic basis of rapid phenotypic change. Here, we sequenced the whole genome of 78 individual ducks, from two wild populations and seven domesticated populations, with an average sequencing depth &gt; 45X for each population. Our population and demographic analysis indicates a complex history of domestication, with early selection for separate meat and egg lineages. Genomic comparison of wild to domesticated populations suggest that genes affecting brain and neuronal development have undergone strong positive selection during domestication. Our FST analysis also first indicates the duck white plumage associated with selection at the melanogenesis associated transcription factor locus. Our results advance the understanding of animal domestication and selection for complex phenotypic traits.</p> |                   |
| <b>Corresponding Author:</b>                         | Lujiang Qu, Ph.D.<br>China Agricultural University<br>Beijing, CHINA                                                                                                                                                                                                                                                                                                                                                                                                                                                                                                                                                                                                                                                                                                                                                                                                                                                                                                                                                                                                                                  |                   |
| <b>Corresponding Author Secondary Information:</b>   |                                                                                                                                                                                                                                                                                                                                                                                                                                                                                                                                                                                                                                                                                                                                                                                                                                                                                                                                                                                                                                                                                                       |                   |
| <b>Corresponding Author's Institution:</b>           | China Agricultural University                                                                                                                                                                                                                                                                                                                                                                                                                                                                                                                                                                                                                                                                                                                                                                                                                                                                                                                                                                                                                                                                         |                   |
| <b>Corresponding Author's Secondary Institution:</b> |                                                                                                                                                                                                                                                                                                                                                                                                                                                                                                                                                                                                                                                                                                                                                                                                                                                                                                                                                                                                                                                                                                       |                   |
| <b>First Author:</b>                                 | Zebin Zhang                                                                                                                                                                                                                                                                                                                                                                                                                                                                                                                                                                                                                                                                                                                                                                                                                                                                                                                                                                                                                                                                                           |                   |
| <b>First Author Secondary Information:</b>           |                                                                                                                                                                                                                                                                                                                                                                                                                                                                                                                                                                                                                                                                                                                                                                                                                                                                                                                                                                                                                                                                                                       |                   |
| <b>Order of Authors:</b>                             | Zebin Zhang                                                                                                                                                                                                                                                                                                                                                                                                                                                                                                                                                                                                                                                                                                                                                                                                                                                                                                                                                                                                                                                                                           |                   |
|                                                      | Yaxiong Jia                                                                                                                                                                                                                                                                                                                                                                                                                                                                                                                                                                                                                                                                                                                                                                                                                                                                                                                                                                                                                                                                                           |                   |
|                                                      | Pedro Almeida                                                                                                                                                                                                                                                                                                                                                                                                                                                                                                                                                                                                                                                                                                                                                                                                                                                                                                                                                                                                                                                                                         |                   |
|                                                      | Judith E Mank                                                                                                                                                                                                                                                                                                                                                                                                                                                                                                                                                                                                                                                                                                                                                                                                                                                                                                                                                                                                                                                                                         |                   |
|                                                      | Marcel van Tuinen                                                                                                                                                                                                                                                                                                                                                                                                                                                                                                                                                                                                                                                                                                                                                                                                                                                                                                                                                                                                                                                                                     |                   |
|                                                      | Qiong Wang                                                                                                                                                                                                                                                                                                                                                                                                                                                                                                                                                                                                                                                                                                                                                                                                                                                                                                                                                                                                                                                                                            |                   |
|                                                      | Zhihua Jiang                                                                                                                                                                                                                                                                                                                                                                                                                                                                                                                                                                                                                                                                                                                                                                                                                                                                                                                                                                                                                                                                                          |                   |
|                                                      | Yu Chen                                                                                                                                                                                                                                                                                                                                                                                                                                                                                                                                                                                                                                                                                                                                                                                                                                                                                                                                                                                                                                                                                               |                   |
|                                                      | Kai Zhan                                                                                                                                                                                                                                                                                                                                                                                                                                                                                                                                                                                                                                                                                                                                                                                                                                                                                                                                                                                                                                                                                              |                   |
|                                                      | Shuisheng Hou                                                                                                                                                                                                                                                                                                                                                                                                                                                                                                                                                                                                                                                                                                                                                                                                                                                                                                                                                                                                                                                                                         |                   |
|                                                      |                                                                                                                                                                                                                                                                                                                                                                                                                                                                                                                                                                                                                                                                                                                                                                                                                                                                                                                                                                                                                                                                                                       |                   |

|                                                                                                                                                                                                                                                                                                                                                                                                                                                                                                                                     |                                                                                                                                                                                                                                                                                                                                     |
|-------------------------------------------------------------------------------------------------------------------------------------------------------------------------------------------------------------------------------------------------------------------------------------------------------------------------------------------------------------------------------------------------------------------------------------------------------------------------------------------------------------------------------------|-------------------------------------------------------------------------------------------------------------------------------------------------------------------------------------------------------------------------------------------------------------------------------------------------------------------------------------|
|                                                                                                                                                                                                                                                                                                                                                                                                                                                                                                                                     | Zhengkui Zhou                                                                                                                                                                                                                                                                                                                       |
|                                                                                                                                                                                                                                                                                                                                                                                                                                                                                                                                     | Huifang Li                                                                                                                                                                                                                                                                                                                          |
|                                                                                                                                                                                                                                                                                                                                                                                                                                                                                                                                     | Fangxi Yang                                                                                                                                                                                                                                                                                                                         |
|                                                                                                                                                                                                                                                                                                                                                                                                                                                                                                                                     | Yong He                                                                                                                                                                                                                                                                                                                             |
|                                                                                                                                                                                                                                                                                                                                                                                                                                                                                                                                     | Lujiang Qu, Ph.D.                                                                                                                                                                                                                                                                                                                   |
| <b>Order of Authors Secondary Information:</b>                                                                                                                                                                                                                                                                                                                                                                                                                                                                                      |                                                                                                                                                                                                                                                                                                                                     |
| <b>Opposed Reviewers:</b>                                                                                                                                                                                                                                                                                                                                                                                                                                                                                                           | <p>Yinhua Huang<br/>yinhua Huang@126.com<br/>scientific interest conflict</p> <p>Erik Axelsson<br/>erik.axelsson@imbim.uu.se<br/>scientific interest conflict</p> <p>Matthew Webster<br/>mattew.webster@imbim.uu.se<br/>scientific interest conflict</p> <p>Zhuocheng Hou<br/>zchou@cau.edu.cn<br/>scientific interest conflict</p> |
| <b>Additional Information:</b>                                                                                                                                                                                                                                                                                                                                                                                                                                                                                                      |                                                                                                                                                                                                                                                                                                                                     |
| <b>Question</b>                                                                                                                                                                                                                                                                                                                                                                                                                                                                                                                     | <b>Response</b>                                                                                                                                                                                                                                                                                                                     |
| Are you submitting this manuscript to a special series or article collection?                                                                                                                                                                                                                                                                                                                                                                                                                                                       | No                                                                                                                                                                                                                                                                                                                                  |
| <p><b>Experimental design and statistics</b></p> <p>Full details of the experimental design and statistical methods used should be given in the Methods section, as detailed in our <a href="#">Minimum Standards Reporting Checklist</a>. Information essential to interpreting the data presented should be made available in the figure legends.</p> <p>Have you included all the information requested in your manuscript?</p>                                                                                                  | Yes                                                                                                                                                                                                                                                                                                                                 |
| <p><b>Resources</b></p> <p>A description of all resources used, including antibodies, cell lines, animals and software tools, with enough information to allow them to be uniquely identified, should be included in the Methods section. Authors are strongly encouraged to cite <a href="#">Research Resource Identifiers</a> (RRIDs) for antibodies, model organisms and tools, where possible.</p> <p>Have you included the information requested as detailed in our <a href="#">Minimum Standards Reporting Checklist</a>?</p> | Yes                                                                                                                                                                                                                                                                                                                                 |

|                                                                                                                                                                                                                                                                                                                                                                                                                                                                                                                                                         |            |
|---------------------------------------------------------------------------------------------------------------------------------------------------------------------------------------------------------------------------------------------------------------------------------------------------------------------------------------------------------------------------------------------------------------------------------------------------------------------------------------------------------------------------------------------------------|------------|
|                                                                                                                                                                                                                                                                                                                                                                                                                                                                                                                                                         |            |
| <p><b>Availability of data and materials</b></p> <p>All datasets and code on which the conclusions of the paper rely must be either included in your submission or deposited in <a href="#">publicly available repositories</a> (where available and ethically appropriate), referencing such data using a unique identifier in the references and in the “Availability of Data and Materials” section of your manuscript.</p> <p>Have you have met the above requirement as detailed in our <a href="#">Minimum Standards Reporting Checklist</a>?</p> | <p>Yes</p> |

---

# 1 **Whole-genome resequencing reveals signatures of** 2 **selection and timing of duck domestication**

3 Zebin Zhang <sup>†,1</sup>, Yaxiong Jia<sup>†,2</sup>, Pedro Almeida<sup>3</sup>, Judith E Mank<sup>3,4</sup>, Marcel van  
4 Tuinen<sup>5</sup>, Qiong Wang<sup>1</sup>, Zhihua Jiang<sup>6</sup>, Yu Chen<sup>7</sup>, Kai Zhan<sup>8</sup>, Shuisheng Hou<sup>2</sup>,  
5 Zhengkui Zhou<sup>2</sup>, Huifang Li<sup>9</sup>, Fangxi Yang<sup>10</sup>, Yong He<sup>11</sup>, and Lujiang Qu<sup>1\*</sup>

6 <sup>1</sup>Department of Animal Genetics and Breeding, National Engineering  
7 Laboratory for Animal Breeding, College of Animal Science and Technology,  
8 China Agricultural University, Beijing, China

9 <sup>2</sup>Institute of Animal Science, Chinese Academy of Agricultural Sciences, Beijing,  
10 China

11 <sup>3</sup>Department of Genetics, Evolution and Environment, University College  
12 London, London, UK

13 <sup>4</sup>Department of Organismal Biology, Evolutionary Biology Centre, Uppsala  
14 University, Uppsala, Sweden

15 <sup>5</sup>Centre of Evolutionary and Ecological Studies, Marine Evolution and  
16 Conservation Group, University of Groningen, Groningen, The Netherlands

17 <sup>6</sup>Department of Animal Sciences, Center for Reproductive Biology, Veterinary  
18 and Biomedical Research Building, Washington State University, Pullman,  
19 United States

20 <sup>7</sup>Beijing Municipal General Station of Animal Science, Beijing, China

21 <sup>8</sup>Institute of Animal Husbandry and Veterinary Medicine, Anhui Academy of

1  
2  
3  
4  
5  
6  
7  
8  
9  
10  
11  
12  
13  
14  
15  
16  
17  
18  
19  
20  
21  
22  
23  
24  
25  
26  
27  
28  
29  
30  
31  
32  
33  
34  
35  
36  
37  
38  
39  
40  
41  
42  
43  
44  
45  
46  
47  
48  
49  
50  
51  
52  
53  
54  
55  
56  
57  
58  
59  
60  
61  
62  
63  
64  
65



1  
2  
3  
4  
5  
6  
7  
8  
9  
10  
11  
12  
13  
14  
15  
16  
17  
18  
19  
20  
21  
22  
23  
24  
25  
26  
27  
28  
29  
30  
31  
32  
33  
34  
35  
36  
37  
38  
39  
40  
41  
42  
43  
44  
45  
46  
47  
48  
49  
50  
51  
52  
53  
54  
55  
56  
57  
58  
59  
60  
61  
62  
63  
64  
65

- 
- 22 Agricultural Sciences, Hefei, China
  - 23 <sup>9</sup>Poultry Institute, Chinese Academy of Agriculture Science, Yangzhou, China
  - 24 <sup>10</sup>Institute of Pekin Duck, Beijing, China
  - 25 <sup>11</sup>Cherry Valley farms (xianghe) Co.,Ltd, Langfang, China
  - 26 †These authors contributed equally to this work.
  - 27 \*Corresponding authors: [guluj@163.com](mailto:guluj@163.com)

---

1    28    **Abstract**

2  
3  
4    29    The genetic basis of animal domestication remains poorly understood, and  
5  
6  
7    30    systems with substantial phenotypic differences between wild and domestic  
8  
9  
10    31    populations are useful for elucidating the genetic basis of adaptation to new  
11  
12  
13    32    environments as well as the genetic basis of rapid phenotypic change. Here,  
14  
15  
16    33    we sequenced the whole genome of 78 individual ducks, from two wild  
17  
18  
19    34    populations and seven domesticated populations, with an average sequencing  
20  
21  
22    35    depth > 45X for each population. Our population and demographic analysis  
23  
24  
25    36    indicates a complex history of domestication, with early selection for separate  
26  
27  
28    37    meat and egg lineages. Genomic comparison of wild to domesticated  
29  
30  
31    38    populations suggest that genes affecting brain and neuronal development have  
32  
33  
34    39    undergone strong positive selection during domestication. Our  $F_{ST}$  analysis also  
35  
36  
37    40    first indicates the duck white plumage associated with selection at the  
38  
39  
40    41    *melanogenesis associated transcription factor* locus. Our results advance the  
41  
42  
42    42    understanding of animal domestication and selection for complex phenotypic  
43  
44  
43    43    traits.

45    44    **Keywords:** duck, domestication, intensive selection, neuronal development,  
46  
47  
48    45    energy metabolism, plumage colouration.

49  
50  
51    46

52  
53  
54    47

55  
56  
57    48

---

## 49 Introduction

1  
2  
3  
4 50 *Anas platyrhynchos* (ducks or mallards) are the world's most widely  
5  
6  
7 51 distributed and agriculturally important waterfowl, and are of particular  
8  
9  
10 52 economic and importance in Asia [1]. Although forms of the mallard have been  
11  
12  
13 53 farmed in Asia for over a thousand years, the exact timing of domestication  
14  
15  
16 54 remains unknown, with written records indicating domestic ducks in central  
17  
18 55 China shortly after 500 BC [2]. Moreover, domesticated mallards show many  
19  
20  
21 56 important behavioral [3] and morphological [4-6] differences from their wild  
22  
23  
24 57 ancestors, particularly related to plumage and neuroanatomy, offering an  
25  
26  
27 58 important opportunity to understand the genetic basis of these phenotypic  
28  
29  
30 59 differences.

31  
32 60 In order to determine the timing of duck domestication in China, as well as  
33  
34  
35 61 identify the genomic regions under selection during domestication, we  
36  
37  
38 62 performed whole genome resequencing from 78 individuals belonging to seven  
39  
40  
41 63 different duck breeds (three for meat breeds, three for egg breeds, and one  
42  
43  
44 64 dual-purpose breed) and two geographically distinct wild populations. Using the  
45  
46  
47 65 36.1 million single nucleotide polymorphisms (SNPs) and 3.1 million small  
48  
49  
50 66 insertions and deletions (INDELs), we analyzed the structure of these  
51  
52  
53 67 populations and signatures of selection associated with domestication. We  
54  
55  
56 68 identified two distinct domesticated populations, originating from a single  
57  
58  
59 69 domestication event roughly 2000 years ago. We also identified signatures of  
60  
61  
62 70 selection on genes associated with neuronal development, energy metabolism,

---

1 71 vision and plumage during domestication. Together, our results reveal a  
2  
3 72 complex pattern of selection associated with the domestication of the duck.  
4  
5

## 6 7 73 **Results** 8 9

### 10 11 74 Genetic variation 12 13

14  
15 75 We individually sequenced 16 wild and 62 domestic ducks, from two wild  
16  
17  
18 76 populations and seven domestic breeds (three meat breeds, three egg breeds  
19  
20  
21 77 and one dual-purpose breed), from across China ([Fig. 1A](#)) to an average of  
22  
23 78 6.42X coverage per individual after filtering and quality control, resulting in total  
24  
25  
26 79 535 billion mappable reads([Supplemental Table S1](#)).  
27  
28  
29  
30  
31  
32  
33  
34  
35  
36  
37  
38  
39  
40  
41  
42  
43  
44  
45  
46  
47  
48  
49  
50  
51  
52  
53  
54  
55  
56  
57  
58  
59  
60  
61  
62  
63  
64  
65

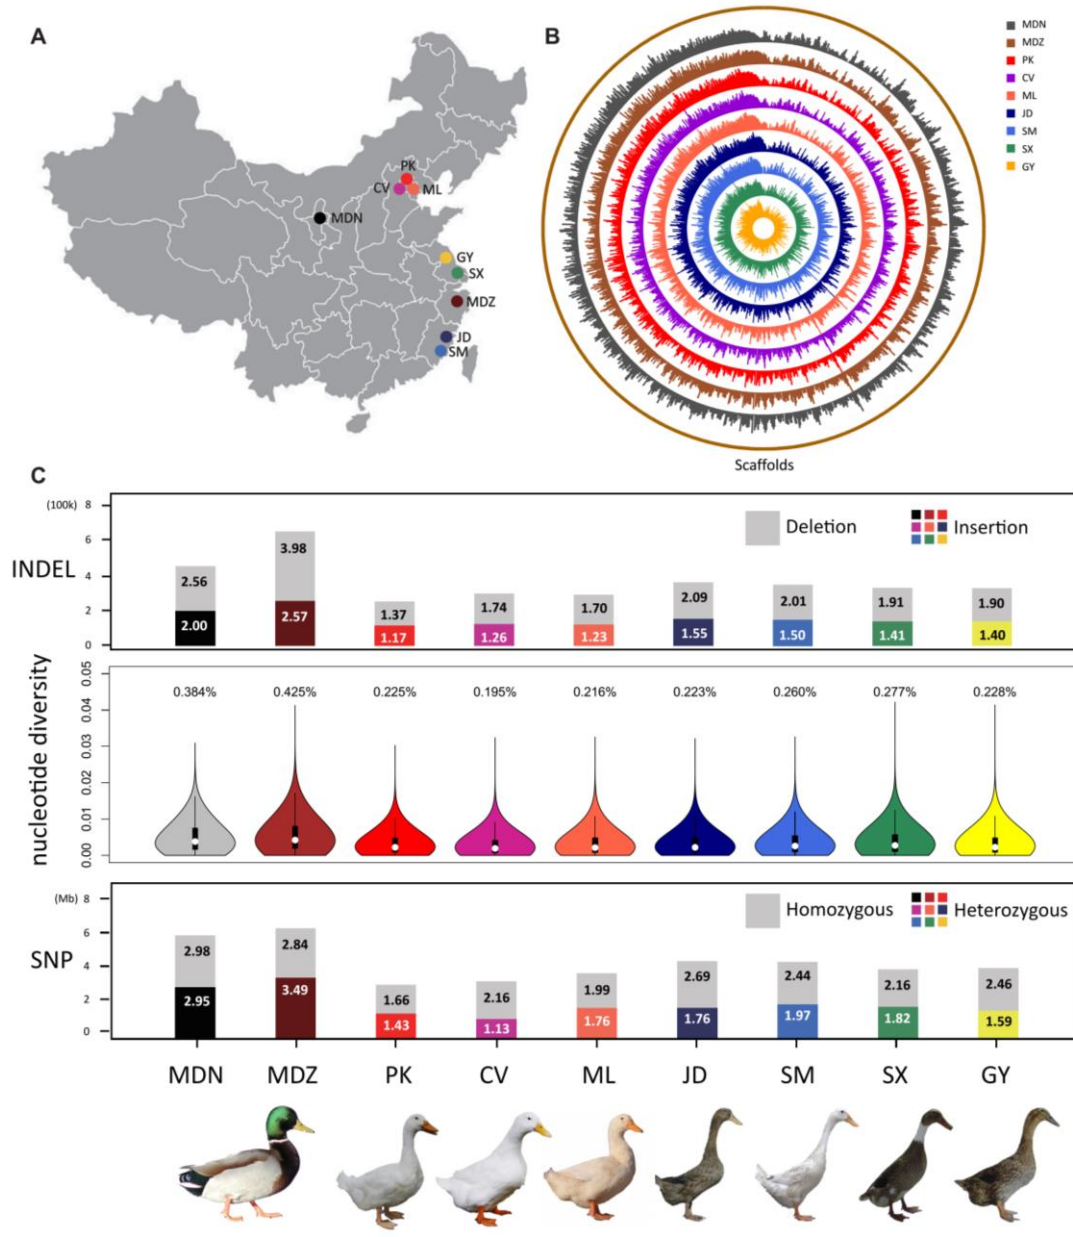

80

81 **Figure. 1 Experimental design and variants statistics**

82 **(A)** Sampling sites in this study. A total of 78 ducks from two wild populations (Mallard Ningxia  
 83 (MDN) n=8; Mallard Zhejiang (MDZ) n=14), three meat breeds (Pekin (PK) n=8; Cherry Valley  
 84 (CV) n=8; Maple Leaf (ML) n=8), three egg breeds (Jin Ding (JD) n=8; Shan Ma (SM) n=8;  
 85 Shao Xing (SX) n=8), and one dual breed (Gao You (GY) n=8) were selected.

86 **(B)** Circos plot of SNP distribution and density of seven domestic breeds and two wild

1  
2  
3  
4  
5  
6  
7  
8  
9  
10  
11  
12  
13  
14  
15  
16  
17  
18  
19  
20  
21  
22  
23  
24  
25  
26  
27  
28  
29  
30  
31  
32  
33  
34  
35  
36  
37  
38  
39  
40  
41  
42  
43  
44  
45  
46  
47  
48  
49  
50  
51  
52  
53  
54  
55  
56  
57  
58  
59  
60  
61  
62  
63  
64  
65

---

1 87 populations across the genome. The duck whole genome reference is shown in the outermost  
2  
3 88 circle (non-overlapping, window size = 1 Mb).  
4  
5  
6 89 **(C)** Genomic variation of nine population ducks. Mean number of SNPs, heterozygous and  
7  
8  
9 90 homozygous SNP ratio in the nine populations as shown at the bottom. Homozygous SNP  
10  
11 91 ratios in domesticated ducks are significantly higher than ratios in wild mallards ( $p = 1.35 \times$   
12  
13 92  $10^{-10}$ ). Nucleotide diversity ratio in the nine populations are shown at the middle. The  
14  
15 93 nucleotide diversity ratio in wild mallards are dramatically higher than ratios in domesticated  
16  
17 94 ducks ( $p = 2.20 \times 10^{-16}$ ). Number of insertions and deletions in the nine populations are shown  
18  
19 95 at the top. The number of deletion was higher than insertion in all nine populations.  
20  
21  
22  
23  
24  
25  
26  
27

28 97 We detected 36.1 million (M) SNPs in total, with an average for each  
29  
30 98 individual of 4.5M (range = 2.34 – 9.52M), which covered 96.2% of the duck  
31  
32 99 dbSNP database deposited in the Genome Variation Map (GVM)  
33  
34 100 (<http://bigd.big.ac.cn/gvm/>). We also identified 3.1M INDELS, with an average  
35  
36 101 of 0.4M (range = 0.21 – 0.89M) (Fig. 1C, Supplemental Figs. S1 - S2,  
37  
38 102 Supplemental Table S2). Both the number of SNPs (t test,  $p = 3.13 \times 10^{-12}$ )  
39  
40 103 and nucleotide diversity (t test,  $p = 2.20 \times 10^{-16}$ ) are lower in domesticated  
41  
42 104 compared to wild mallards (Fig. 1B - C), consistent with the larger panmictic  
43  
44 105 wild population. Single base-pair INDELS were the predominant form,  
45  
46 106 accounting for 38.63% of all detected INDELS (Supplemental Table S3).  
47  
48  
49  
50  
51  
52  
53  
54  
55  
56  
57  
58  
59  
60  
61  
62  
63  
64  
65

---

1 107 Population structure and domestication

2  
3  
4 108 Phylogenetic relationships, based on a neighbor-joining (NJ) of pairwise  
5  
6  
7 109 genetic distances of whole genome SNPs (Fig. 2A) and Principal Component  
8  
9  
10 110 Analysis (PCA, Fig. 2B) revealed strong clustering into three distinct genetic  
11  
12  
13 111 groups. The two wild populations (MDN and MDZ) clustered together, with the  
14  
15  
16 112 three meat type population ducks (PK, CV, and ML) clustered together into a  
17  
18  
19 113 second group, and the three egg type populations (JD, SM, and SX) clustered  
20  
21 114 with the dual-purpose type ducks (GY) into a third group.

22  
23 115 We further performed population structure analysis using FRAPPE [7],  
24  
25  
26 116 which estimates individual ancestry and admixture proportions assuming K  
27  
28  
29 117 ancestral populations (Fig. 2C). With K = 2, a clear division was found between  
30  
31  
32 118 wild type ducks (MDN and MDZ) and domesticated ducks (PK, CV, ML, JD, SM,  
33  
34  
35 119 SX, and GY). With K = 3, a clear division was found between meat type ducks  
36  
37  
38 120 (PK, CV, and ML) and egg type ducks mixed with dual-purpose type ducks (JD,  
39  
40 121 SM, SX, and GY).  
41  
42  
43  
44  
45  
46  
47  
48  
49  
50  
51  
52  
53  
54  
55  
56  
57  
58  
59  
60  
61  
62  
63  
64  
65

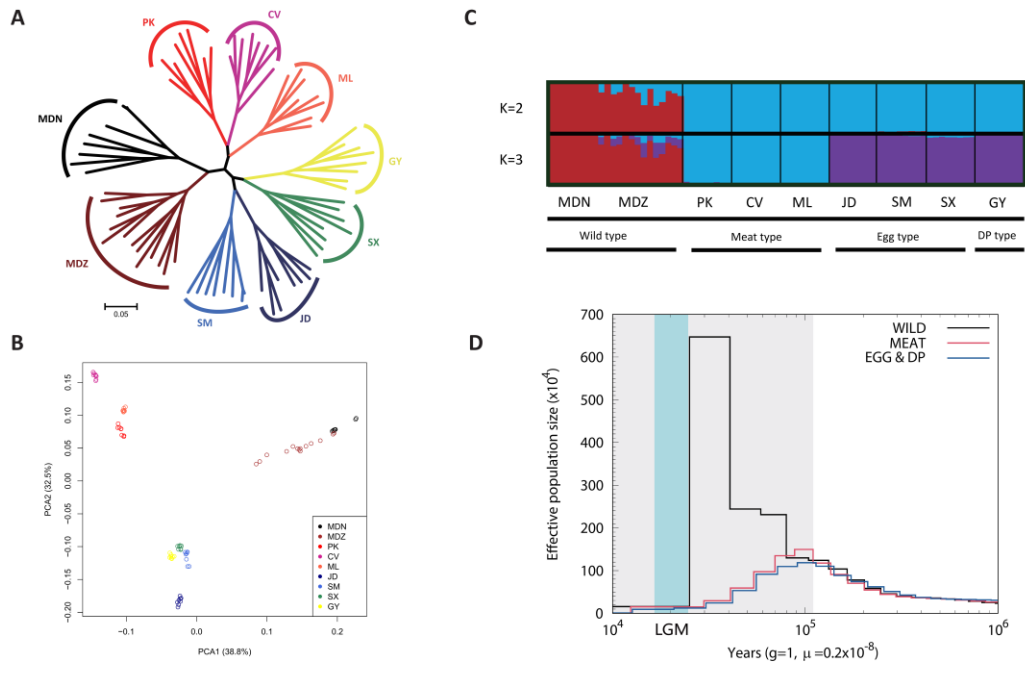

122

123 **Figure. 2 Population genetic structure and demographic history of nine duck**  
 124 **populations**

125 **(A)** Neighbor-joining phylogenetic tree of nine duck populations. The scale bar is  
 126 proportional to genetic differentiation (p distance).

127 **(B)** PCA plot of duck populations. Eigenvector 1 and 2 explained 38.8% and 32.5% of the  
 128 observed variance, respectively.

129 **(C)** Population genetic structure of 78 ducks. The length of each colored segment  
 130 represents the proportion of the individual genome inferred from ancestral populations (K = 2-  
 131 3). The population names and production type are at the bottom. DP type means dual-purpose  
 132 type.

133 **(D)** Demographic history of duck populations. Examples of PSMC estimate changes in the  
 134 effective population size over time, representing variation in inferred Ne dynamics. The lines  
 135 represent inferred population sizes and the gray shaded areas indicate the Pleistocene period,  
 136 with Last Glacial Period (LGP) shown in darker gray, and Last Glacial Maximum (LGM) shown

1  
2  
3  
4  
5  
6  
7  
8  
9  
10  
11  
12  
13  
14  
15  
16  
17  
18  
19  
20  
21  
22  
23  
24  
25  
26  
27  
28  
29  
30  
31  
32  
33  
34  
35  
36  
37  
38  
39  
40  
41  
42  
43  
44  
45  
46  
47  
48  
49  
50  
51  
52  
53  
54  
55  
56  
57  
58  
59  
60  
61  
62  
63  
64  
65



---

1 137 in light blue areas.

2  
3 138

4  
5  
6 139 Together, these results indicate two genetic clusters of domesticated  
7  
8  
9 140 breeds, either domesticated once with subsequent subdivision due to divergent  
10  
11 141 selection, or domesticated twice independently. In order to differentiate these  
12  
13 142 alternatives, we explored the demographic history of our samples, first  
14  
15 143 estimating changes in effective population size ( $N_e$ ) in our three genetic clusters  
16  
17 144 in a pairwise sequentially Markovian coalescent (PSMC) framework [8]. The  
18  
19  
20 145 meat type ducks (PK, CV, and ML) showed concordant demographic  
21  
22  
23 146 trajectories with egg and mixture type populations (JD, SM, SX, and GY) with  
24  
25  
26 147 one apparent expansion around the Penultimate Glaciation Period (PGP, 0.30-  
27  
28  
29 148 0.13 Mya) [9,10] and Last Glacial Period (LGP, 110-12 kya) [11,12], followed by  
30  
31  
32 149 a subsequent contraction (Fig. 2D).

33  
34  
35  
36 150 We tested multiple demographic scenarios related to domestication using  
37  
38  
39 151 a diffusion approximation method for the allele frequency spectrum ( $\partial a \partial i$ )  
40  
41  
42 152 (Supplemental Fig. S3 and S4). Among the four isolation models tested (models  
43  
44  
45 153 1 - 4), the model of a single domestication with subsequent divergence of the  
46  
47  
48 154 domesticated breeds (Model 2) was both consistent with our population  
49  
50  
51 155 structure results (Fig. 2) and had the lowest Akaike Information Criteria (AIC),  
52  
53 156 indicating a better overall fit to the data (log-likelihood = -33,388.43; AIC =  
54  
55  
56 157 66,788) (Supplemental Fig. S3).

57  
58 158 Demographic parameters estimated from the single domestication model  
59  
60  
61  
62  
63  
64  
65

(Model 2) indicated that domestication occurred approximately 2,200 years ago, followed by a rapid subsequent divergence of the meat breed from the egg/dual purpose breeds roughly 100 years after the initial domestication event (Table 1). Our results suggest that following an initial bottleneck associated with domestication, with an estimated  $N_e$  of 305 individuals for the ancestral domesticated population, the population has expanded to the current  $N_e$  of 5,345 and 12,404 in the meat type and egg/dual purpose breeds respectively.  $N_e$  estimates for domesticated breeds are lower than that in wild mallards, consistent with the large panmictic wild population.

168

**Table 1.** Maximum likelihood population demographic parameters. Best fit parameter estimates for the model of a single domestication event followed by divergence of the domesticated breeds, including changes in population size. Time estimates are given in years and migration are in units of number of migrants per generation.

174

| Parameter                                       | ML estimate |
|-------------------------------------------------|-------------|
| $N_e$ of ancestral population after size change | 633,584     |
| $N_e$ of the wild population                    | 84,845      |
| $N_e$ of the ancestral domesticated population  | 305         |
| $N_e$ of the meat breed                         | 5,345       |
| $N_e$ of the egg/dual purpose                   | 12,404      |
| Time of size change in the ancestral population | 238,696     |
| Time of domestication                           | 2,128       |
| Time of breed divergence                        | 2,030       |
| Migration $_{wild \leftarrow meat}$             | 1.21        |
| Migration $_{wild \leftarrow egg/dp}$           | 3.92        |

175

Gene flow estimates were relatively high, and were 1 and 4 migrants per generation from the meat and egg/dual purpose breeds, respectively, into the

177

---

1 178 wild population. Difficulty in differentiating between very recent divergence and  
2  
3 179 high migration rates in the frequency spectrum prevented convergence  
4  
5  
6 180 between independent runs when trying to fit other migration parameters to our  
7  
8  
9 181 model.

## 10 11 182 Selection for plumage color

12  
13  
14 183 Derived traits in domesticated animals tend to evolve in a predictable order,  
15  
16  
17 184 with color variation appearing in the earliest stages of domestication, followed  
18  
19  
20 185 by coat or plumage and structural (skeletal and soft tissue) variation, and finally  
21  
22  
23 186 behavioral differences [13,14]. One of the simplest and most visible derived  
24  
25  
26 187 traits of ducks is white plumage color. In order to detect the signature of  
27  
28  
29 188 selection associated with white feathers, we searched the duck genome for  
30  
31  
32 189 regions with high  $F_{ST}$  among the populations of white feather (PK, CV, and ML)  
33  
34 190 and non-white feather (MDN, MDZ, JD, SX, and GY) based on sliding windows  
35  
36  
37 191 of 10kb windows. We identified a region of high differentiation between white  
38  
39  
40 192 plumage and non-white plumage ducks overlapping the *melanogenesis*  
41  
42 193 *associated transcription factor* (*MITF*;  $F_{ST}=0.69$ ) (Fig. 3A). In the intronic region  
43  
44  
45 194 of *MITF*, we identified 13 homozygous SNPs and 2 homozygous INDELS  
46  
47  
48 195 present in all white plumage breeds (n=24). These SNPS were absent in all  
49  
50  
51 196 non-white plumage breeds (n=46) (Fig. 3B). These mutations were completely  
52  
53  
54 197 consistent with the white plumage phenotype suggesting as causative mutation.  
55  
56 198 Our result first indicates the duck white plumage associated with selection at  
57  
58  
59 199 the *MITF* locus.

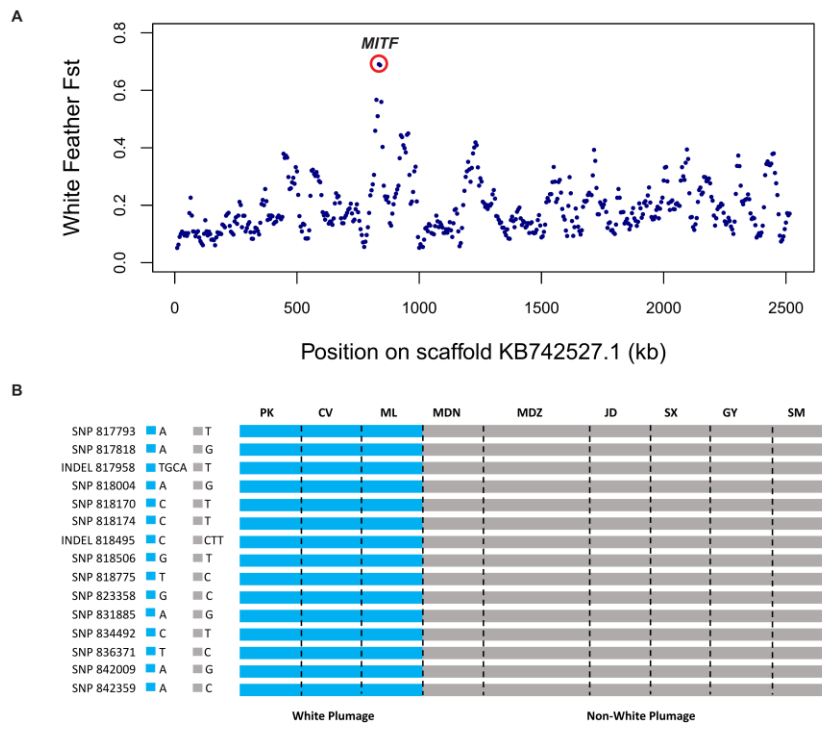

**Figure. 3 MITF shows different genetic signature between white plumage and non-white plumage ducks.**

**(A)** FST plot around the MITF locus. The FST value of MITF is highest for scaffold KB742527.1, circled in red. Each plot represent a 10 kb windows.

**(B)** 13 homozygous SNPs and 2 homozygous INDELS were identified in white plumage ducks and absent in non-white plumage ducks. SNPs and INDELS were named according to their position on scaffold.

### Selection for other domestication traits

In order to detect the signature of selection for other traits associated with duck domestication, we scanned the duck genome for regions with a high coefficient of nucleotide differentiation ( $F_{ST}$ ) among the populations of wild types (MDN and MDZ) and domesticated types (PK, CV, ML, JD, SM, SX, and GY)

213 based on sliding windows of 10kb windows. Owing to the complex and partly  
 214 unresolved demography of these populations, it is difficult to define a strict  
 215 threshold that distinguishes true sweeps from regions of homozygosity caused  
 216 by drift. We therefore also calculated pairwise diversity ratio  
 217 ( $\theta_{\pi}(\text{wild}/\text{domesticated})$ ). We identified 292 genes in the top 5% of both  $F_{ST}$  and  
 218  $\theta_{\pi}$  scores, putatively under positive selection during domestication (Fig. 4A,  
 219 Supplemental Tables S4).

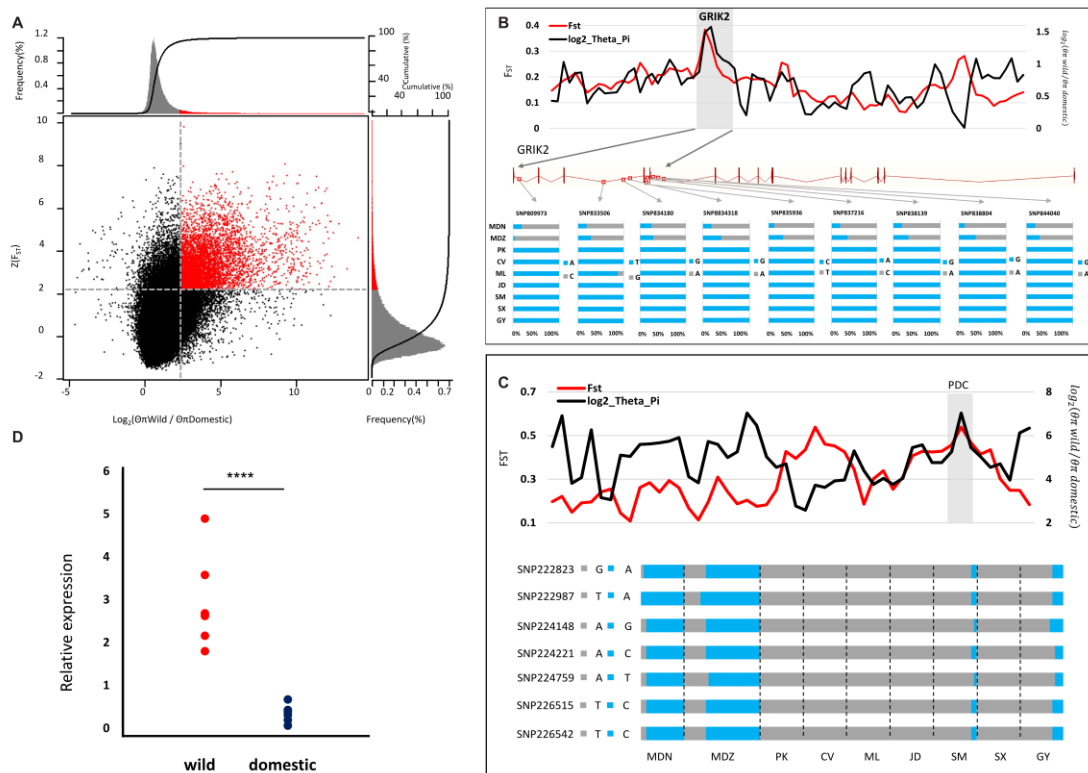

220  
 221 **Figure. 4 Genomic regions with strong selective sweep signals in wild**  
 222 **population ducks and domesticated population ducks.**

223 (A) Distribution of  $\theta_{\pi}$  ratios ( $\theta_{\pi}(\text{wild}/\text{domesticated})$ ) and  $Z(F_{ST})$  values, which are  
 224 calculated using scaffolds longer than 10-kb by 10-kb windows with 5-kb steps. Red data points  
 225 located to the top-right regions correspond to the 5% right tails of empirical  
 226  $\log_2(\theta_{\pi}(\text{wild})/\theta_{\pi}(\text{domestic}))$  ratio distribution and the top 5% empirical  $Z(F_{ST})$  distribution are

---

227 genomic regions under selection during duck domestication. The two horizontal and vertical  
228 gray lines represented the top 5% value of  $Z(F_{ST})$  (2.216) and  $\log_2(\theta\pi_{wild}/\theta\pi_{domestic})$   
229 (2.375), respectively.

230 **(B)**  $\log_2(\theta\pi)$  ratios and  $F_{ST}$  values around the *GRIK2* locus and allele frequencies of  
231 nine SNPs within the *GRIK2* gene across nine duck populations. The black and red lines  
232 represent  $\log_2(\theta\pi_{wild}/\theta\pi_{domestic})$  ratios and  $F_{ST}$  values, respectively. The gray bar  
233 showed the region of under strong selection in *GRIK2* gene. The nine red rectangular frame  
234 corresponding to the locus on gene of nine SNPs. The SNPs were named according to their  
235 position on scaffold.

236 **(C)** The *PDC* gene showed different genetic signature in domesticated and wild duck.  
237  $\log_2(\theta\pi)$  ratios and  $F_{ST}$  values around the *PDC* locus. The *PDC* gene region was showed in  
238 gray par. Allele frequencies of seven SNPs within the *PDC* gene across nine duck populations.  
239 The SNPs were named according to their position on scaffold.

240 **(D)** The *PDC* gene expression level different in domesticated and wild duck. *PDC* mRNA  
241 expression levels in brain of wild (MDN, n=3; MDZ, n=4) and domesticated (PK, n=1; CV, n=1;  
242 ML, n=1; JD, n=1; SM, n=1; SX, n=1; GY, n=1) ducks. \*\*\*\**P* value from *t*-test ( $P<0.0001$ ).

243 Because domesticated ducks are known to differ from wild ducks in body  
244 size, body fat percentage, behavior, egg productivity, growth speed, and flight  
245 capability, we focused our analysis on GO annotations of neural related  
246 processes, lipid metabolism and energy metabolism, reproduction, and skeletal  
247 muscle contraction for our 292 putative positively selection genes. In this  
248 reduced data set, the neuro-synapse-axon and lipid-energy metabolism

---

1 249 pathways were over-represented ([Supplemental Table S5](#)) in our list of genes  
2  
3 250 under selection.  
4  
5

6 251 From the highlighted GO terms, a total of 25 neuro-synapse-axon genes  
7  
8 252 were identified as under positive selection, with six (*ADGRB3*, *EFNA5*, *GRIN3A*,  
9  
10 253 *GRIK2*, *SYNGAP1*, and *HOMER1*) in the top 1% of  $F_{ST}$  and  $\theta_{\pi}$  ([Supplemental](#)  
11  
12 254 [Tables S6](#)). In particular, *GRIK2* (glutamate receptor, ionotropic kainate 2) and  
13  
14 255 *GRIN3A* (glutamate receptor, subunit 3A) both showed high  $F_{ST}$  and  $\theta_{\pi}$  value  
15  
16 256 compared to neighboring regions, suggesting functional importance ([Fig. 3B](#),  
17  
18 257 [Supplemental Table S4, S6](#)).  
19  
20  
21  
22  
23  
24

25 258 Beyond the neuronal genes, 115 genes were identified in the four lipid and  
26  
27 259 energy related pathways with high  $F_{ST}$  and  $\theta_{\pi}$  values, particularly related to  
28  
29 260 fatty acid metabolism. Among these genes, 37 genes were found with both  
30  
31 261 parameters yielding top 1% ranked values ([Supplemental Tables S6](#)), such as  
32  
33 262 phosphatidylinositol 3-kinase catalytic subunit type 3 (*PIK3C3*), and patatin like  
34  
35 263 phospholipase domain containing 8 (*PNPLA8*).  
36  
37  
38  
39  
40  
41

42 264 To infer whether selection extends beyond yielding novel allelic variation  
43  
44 265 by also affecting gene expression, we compared individual gene expression in  
45  
46 266 the brain, liver, and in breast muscle between seven wild mallards and seven  
47  
48 267 domesticated ducks with RNA-seq ([Supplemental Tables S7](#)). We detected  
49  
50 268 three genes (*PDC*, *MLPH*, and *NID2*) in the brain, two genes (*MAPK12* and  
51  
52 269 *BST1*) in the liver, and zero genes in breast muscle with significantly different  
53  
54 270 expression between wild and domesticated ducks. Of the five differentially  
55  
56  
57  
58  
59  
60  
61  
62  
63  
64  
65

---

1 271 expressed genes, *PDC* was the only gene which also showed evidence of a  
2  
3 272 selective sweep at the genomic level ([Supplemental Tables S4, Fig. 3C - D](#)).  
4  
5  
6 273 The results imply that the *PDC* gene is of substantial functional importance in  
7  
8  
9 274 phenotypic differentiation among wild and domestic ducks through both allelic  
10  
11 275 and expression differences.  
12  
13

## 14 276 **Discussion**

15  
16  
17  
18  
19 277 Animal domestication was one of the major contributory factors of the  
20  
21  
22 278 agricultural revolution during the Neolithic period, which resulted in a shift in  
23  
24  
25 279 human lifestyle from hunting to farming [15]. Since this transition, domesticated  
26  
27  
28 280 animals have contributed greatly to human society and human population  
29  
30  
31 281 growth by provision of stable animal protein, fat, and accessory products such  
32  
33 282 as leather and feathers (including down). Whole genome sequencing has made  
34  
35  
36 283 it possible to illuminate the genetic trajectories of animal domestication such as  
37  
38  
39 284 those observed in pig [16], sheep [17], rabbit [18] and chicken [19,20].  
40

41 285 In this study, we performed whole-genome sequencing of 78 ducks  
42  
43  
44 286 including seven domesticate breeds and two wild populations. This is the first  
45  
46  
47 287 study to characterize the genetic architecture, phylogenetic relationships and  
48  
49  
50 288 domestication history of domesticated ducks and wild mallards. We first  
51  
52  
53 289 catalogued millions of 36.1M SNPs and 3.1M INDELS, and in both cases, we  
54  
55  
56 290 observed higher mean variant numbers and nucleotide diversity for the wild  
57  
58 291 mallard populations compared to the domestics, consistent with both a greater  
59  
60  
61  
62  
63  
64  
65



---

1 292 panmictic mallard population as well as recent sweeps associated with  
2  
3 293 domestication.  
4  
5

6 294 Population structure and domestication  
7

8  
9 295 We observed a large expansion of the duck population at the interglacial  
10  
11 296 period, which could be the result of beneficial climatic changes, including rising  
12  
13 297 temperatures and sea levels. In contrast, the glacial maximum coincided with a  
14  
15 298 much reduced duck population size, consistent with harsher conditions and  
16  
17 299 limited access to arctic breeding grounds [10,21-23]. The demographic pattern  
18  
19 300 we observe in wild ducks is similar to that observed in wild boars [16], wild yaks  
20  
21 301 [24], and wild horses [25]. However, it is worth noting that although PSMC is a  
22  
23 302 powerful method to infer changes in  $N_e$  over time, it is also sensitive to  
24  
25 303 deviations from a neutral model. The effects of genetic drift and/or selection  
26  
27 304 could lead to time-dependent estimates of mutation rate, and bias our estimates  
28  
29 305 of population expansion [12].  
30  
31  
32  
33  
34  
35  
36  
37  
38

39 306 We observed three genetic clusters, with wild mallard, meat breeds, and  
40  
41 307 egg/dual purpose breeds each representing unique groups. These results  
42  
43 308 suggest either a single domestication event followed by subsequent breed-  
44  
45 309 specific selection, or two separate domestication events. In order to distinguish  
46  
47 310 alternative models of domestication, we modeled population demographics and  
48  
49 311 found strong support for a single domestication event roughly 2,100 years ago,  
50  
51 312 with the rapid subsequent selection for separate meat and egg/dual purpose  
52  
53 313 breeds roughly 100 generations later. We note that the evolutionary history of  
54  
55  
56  
57  
58  
59  
60  
61  
62  
63  
64  
65

---

1 314 wild mallards and domesticated duck breeds is likely to be more complex than  
2  
3 315 the simple demographic scenarios modelled here, and further studies may be  
4  
5  
6 316 needed to fully capture the evolutionary dynamics of duck domestication.  
7  
8  
9 317 Nevertheless, time estimates obtained with our model are compatible with  
10  
11 318 previous written records from 500 BC [2].  
12

### 13 319 Selection for white plumage

14  
15  
16 320 Plumage color is an important domestication trait, and we compared  
17  
18  
19 321 breeds with white plumage to those with colored plumage. We identified high  
20  
21  
22 322 levels of divergence in the intronic region of the *MITF* gene, an important  
23  
24  
25 323 developmental locus with a complex regulation implicated in pigmentation and  
26  
27  
28 324 melanocyte development in several vertebrate species [26-28], including  
29  
30  
31 325 Japanese quail [29] and dog [30].  
32

### 33 326 Selection for other domestication traits

34  
35  
36  
37  
38 327 In order to identify those genomic regions which have been the target of  
39  
40  
41 328 selection during domestication, we used estimates of diversity between wild  
42  
43  
44 329 and domestic samples, retaining those 292 genes in the top 5% of both  $F_{ST}$  and  
45  
46  
47 330  $\theta_{\pi}$  values for further analysis. These genes were over-represented for both  
48  
49  
50 331 neural developmental and lipid metabolism, suggesting that these  
51  
52  
53 332 functionalities were under strong selection during domestication. Two loci,  
54  
55 333 *GRIK2* and *GRIN3A*, showed particularly strong signatures of genetic sweep  
56  
57  
58 334 associated with domestication. *GRIK2* encodes a subunit of a glutamate  
59  
60  
61  
62  
63  
64  
65

---

1 335 receptor that has a role in synaptic plasticity and is important for learning and  
2  
3 336 memory. *GRIN3A* encodes a subunit of the N-methyl-D-aspartate (NMDAR)  
4  
5  
6 337 receptors, which is expressed abundantly in the human cerebral cortex [31] and  
7  
8  
9 338 is involved in the development of synaptic elements

10  
11 339 We also identified five genes with significantly different expression in the  
12  
13  
14 340 brain and liver of domestics compared to their wild ancestor. One of these, *PDC*,  
15  
16  
17 341 also showed evidence of selective sweeps at the genomic level. *PDC* encodes  
18  
19  
20 342 phosducin, a photoreceptor-specific protein highly expressed in retina and  
21  
22  
23 343 pineal gland [32], as well as the brain [33].

24  
25 344 Our results suggest that *PDC*, *GRIK2* and *GRIN3A* may have played a  
26  
27  
28 345 crucial role in duck domestication by altering functional regulation of the  
29  
30  
31 346 developing brain and nervous system. This finding is consistent with theories  
32  
33  
34 347 that behavioral traits are the most critical in the initial steps of animal  
35  
36  
37 348 domestication, allowing animals to tolerate humans and captivity [34,35].  
38  
39  
40 349 Indeed, compared to wild mallards, domestic ducks are more docile, less  
41  
42  
43 350 vigilant, and show important differences in brain morphology [3,4]. Interestingly,  
44  
45  
46 351 differential selection on brain and nervous system functions was also observed  
47  
48  
49 352 in domestication studies of rabbits [18], dogs [36], chickens [19]. In particular,  
50  
51  
52 353 *GRIK2* was also found to play a crucial role during rabbit domestication [18].

53 354 Besides brain and nervous system related genes, we also identified  
54  
55  
56 355 several genes that play an important function in lipid and energy metabolism.

57  
58 356 For example, *PIK3C3* plays an important role in ATP binding but also regulates  
59  
60  
61  
62  
63  
64  
65

---

1 357 brain development and axons of cortical neurons [37-41]. *PNPLA8* is involved  
2  
3 358 in facilitating lipid storage in adipocyte tissue energy mobilization and maintains  
4  
5  
6 359 mitochondrial integrity [42,43], as well as plays a role in lipid metabolism  
7  
8  
9 360 associated with neurodegenerative diseases [44-46]. *PRKAR2B* is associated  
10  
11 361 with body weight regulation, hyperphagia, and other energy metabolism [47,48].

12  
13  
14 362 Taken together, our results show that duck domestication was recent and  
15  
16  
17 363 complex process, and the genetic basis of domestication traits show many  
18  
19  
20 364 striking overlaps with other vertebrate domestication events.

## 21 22 23 365 **Methods**

### 24 25 26 27 366 Ethics statement

28  
29  
30  
31 367 The entire procedure was carried out in strict accordance with the protocol  
32  
33  
34 368 approved by the Animal Welfare Committee of China Agricultural University  
35  
36  
37 369 (Permit Number: XK622).

### 38 39 40 41 370 Sample selection

42  
43  
44  
45 371 78 ducks were chosen for sequencing, seven different populations of  
46  
47  
48 372 domesticated ducks and two population of mallards from different geographic  
49  
50  
51 373 regions. The domesticated ducks include three meat type populations *i.e.*,  
52  
53 374 Pekin duck (PK; n=8); Cherry Valley duck (CV; n=8); Maple Leaf duck (ML; n=8),  
54  
55  
56 375 three egg type populations *i.e.*, Jin Ding duck (JD; n=8); Shao Xing duck (SX;  
57  
58  
59 376 n=8); Shan Ma duck (SM; n=8), one egg and meat dual-purpose type (DP type)

---

1 377 population *i.e.*, Gao You duck (GY; n=8), and two wild populations come from  
2  
3 378 two different provinces in China with separated by nearly 2,000 km distance *i.e.*,  
4  
5  
6 379 Mallard from Ningxia province (MDN; n=8); Mallard form Zhejiang province  
7  
8  
9 380 (MDZ; n=14). The classification of production types follow the description of  
10  
11 381 Animal Genetic Resources in China Poultry [49]. PK, CV, and ML ducks  
12  
13 382 originated from Beijing; JD and SM ducks originated from Fujian province while  
14  
15  
16 383 SX and GY ducks originated from Jiangsu province. Whole blood samples were  
17  
18  
19 384 collected from brachial veins of ducks by standard venipuncture.  
20  
21

22 385 In addition, 14 male ducks (MDNM, n=3; MDZM, n=4; PKM, n=1; CVM,  
23  
24 386 n=1; MLM, n=1; JDM, n=1; SMM, n=1; SXM, n=1; GYM, n=1) were chosen for  
25  
26  
27 387 RNA-seq.  
28  
29

30 388 Sequencing and mapping statistic of individual ducks in genome and  
31  
32 389 transcriptome analysis were detailed in supplementary files ([Supplemental](#)  
33  
34 390 [Table S1, S7](#)).  
35  
36  
37  
38  
39

### 40 391 Sequencing and library preparation

41  
42  
43

44 392 Genomic DNA was extracted using standard phenol/chloroform extraction  
45  
46 393 method. For each sample, two paired-end libraries (500 bp) were constructed  
47  
48  
49 394 according to manufacturer protocols (Illumina), and sequenced on the Illumina  
50  
51  
52 395 HiSeq 2500 sequencing platform. From each populations, we sequenced seven  
53  
54  
55 396 samples at 5X depth and one at 10X coverage, except for the MDN population,  
56  
57  
58 397 where we sequenced seven individuals at 5X coverage and one at 20X  
59  
60  
61  
62  
63  
64  
65

---

1 398 coverage and the MDZ population, where we sequenced all individuals at 10X  
2  
3 399 coverage. We generated a total of 628.37 Gb of paired-end reads of 100 bp (or  
4  
5  
6 400 150 bp; MDZ) length ([Supplemental Table S1](#)).

7  
8  
9 401 mRNA from brain, liver, and breast muscle of 14 individual ducks were  
10  
11 402 extracted using standard trizol extraction methods. Two paired-end libraries  
12  
13 403 (500 bp) were constructed according to manufacturer instruction (Illumina). All  
14  
15  
16  
17 404 samples were sequenced by Illumina Hiseq 4000 sequencing platform, with  
18  
19  
20 405 32M paired-end 150 bp mapped reads per sample after QC ([Supplemental](#)  
21  
22 406 [Table S7](#)).

#### 23 24 25 26 407 Read alignment and variant calling

27  
28  
29  
30 408 To avoid low quality reads, mainly the result of base-calling duplicates and  
31  
32  
33 409 adapter contamination, we filtered out sequences according to the default  
34  
35  
36 410 parameters of NGS QC Toolkit [50]. Those paired reads which passed  
37  
38  
39 411 Illumina's quality control filter were aligned using BWA-MEM (v0.7.12) to  
40  
41 412 version 1.0 of the *Anas platyrhynchos* genome (BGI\_duck\_1.0) [1]. Duplicate  
42  
43  
44 413 reads were removed from individual samples alignments using Picard tools  
45  
46  
47 414 MarkDuplicates, and reads were merged using MergeSamFiles  
48  
49  
50 415 (<http://broadinstitute.github.io/picard/>).

51  
52 416 The Genome Analysis Toolkit (GATK, v3.5) RealignerTargetCreator and  
53  
54  
55 417 IndelRealigner protocol were used for global realignment of reads around  
56  
57  
58 418 INDELS before variant calling [51,52]. SNPs and small indels (1-50 bp) were  
59  
60  
61  
62  
63  
64  
65

---

1 419 called used the GATK UnifiedGenotyper set for diploids with the parameter of  
2  
3 420 minimum quality score of 20 for both mapped reads and bases to call variants,  
4  
5  
6 421 similarly to previous studies [53-57]. We filtered variants both per population  
7  
8  
9 422 and per individual using GATK according to the stringent filtering criteria. For  
10  
11 423 SNPs of population filter: a.) QUAL > 30.0; b.) QD > 5.0; c.) FS < 60.0; d.) MQ >  
12  
13 424 40.0; e.) MQRankSum > -12.5; f.) ReadPosRankSum > -8.0; Additionally, if  
14  
15  
16  
17 425 there were more than 3 SNPs clustered in a 10 bp window, all three SNPs were  
18  
19  
20 426 considered as false positives and removed [58].  
21

22 427 We used the following population criteria to identify INDELS: QUAL > 30.0,  
23  
24  
25 428 QD > 5.0, FS < 200.0, ReadPosRankSum > -20.0. Of individual filter, we also  
26  
27  
28 429 removed all INDELS and SNPs where the depth of derived variants was less  
29  
30  
31 430 than half the depth of the sequence. All SNPs and INDELS were assigned to  
32  
33  
34 431 specific genomic regions and genes using SnpEff [59] based on the Ensembl  
35  
36 432 duck annotations. After filtering a total of 36,107,949 SNPs and 3,082,731  
37  
38  
39 433 INDELS were identified ([Supplemental Table S2](#)).  
40

#### 41 42 43 434 SNP validation 44

45  
46  
47 435 In order to evaluate the reliability of our data, we compared our SNPs to  
48  
49  
50 436 the duck dbSNP database deposited in the Genome Variation Map (GVM) at  
51  
52  
53 437 the Big Data Center in the Beijing Institute of Genomics, Chinese Academy of  
54  
55 438 Science (<http://bigd.big.ac.cn/gvm/>). 7,908,722 SNPs were validated in the  
56  
57  
58 439 duck dbSNP database, which covered 96.2% of the database ([Supplemental](#)  
59  
60  
61  
62  
63  
64  
65

---

1 440 [Table S2](#)). For the 28,199,227 SNPs not confirmed by dbSNPs, 390 nucleotide  
2  
3 441 sites were further validated by PCR with 100% accuracy, indicating the high  
4  
5  
6 442 reliability of the called SNP variation identified in this study.  
7  
8  
9

### 10 443 Population structure

11  
12  
13  
14 444 We removed all SNPs with a minor allele frequency (MAF)  $\leq 0.1$  and kept  
15  
16 445 only SNPs that occurred in more than 90% of individuals. Vcf files were  
17  
18  
19 446 converted to hapmap format with custom perl scripts, and to PLINK format file  
20  
21  
22 447 by GLU v1.0b3 (<https://code.google.com/archive/p/glu-genetics/>) and PLINK  
23  
24  
25 448 v1.90 [60,61] when appropriate. We used GCTA [62] for Principle Component  
26  
27  
28 449 Analysis (PCA), first by generating the genetic relationship matrix (GRM)  
29  
30  
31 450 followed by the first 20 eigenvectors.  
32

33 451 We used all high quality SNPs to infer population structure using FRAPPE  
34  
35  
36 452 1.1 [7], with 10,000 iterations per run.  
37

38  
39 453 A distance matrix was generated by calculating the pairwise allele sharing  
40  
41  
42 454 distance for each pair of all high quality SNPs. Multiple alignment of the  
43  
44  
45 455 sequences was performed with MUSCLE [63]. A neighbor-joining maximum  
46  
47  
48 456 likelihood phylogenetic tree was constructed with the DNAML program in the  
49  
50  
51 457 PHYLIP package v3.69 [64] and MEGA7 [65,66]. All implementation was  
52  
53  
54 458 performed according to the recommended manipulations of SNPhylo [67].  
55  
56  
57  
58  
59  
60  
61  
62  
63  
64  
65



---

1     459     Demographic history reconstruction

2  
3  
4     460           The demographic history of both wild and domesticated ducks was inferred  
5  
6  
7     461     using a hidden Markov model approach as implemented in Pairwise  
8  
9  
10    462     Sequentially Markovian Coalescence based on SNP distributions [8]. In order  
11  
12  
13    463     to determine which PSMC settings were most appropriate for each population,  
14  
15  
16    464     we reset the number of free atomic time intervals (-p option), upper limit of time  
17  
18  
19    465     to most recent common ancestor (TMRCA) (-t option), and initial value of  $r =$   
20  
21  
22    466      $\theta/\rho$  (-r option) according to previous research [12] and online suggestions by  
23  
24  
25    467     Li and Durbin (<https://github.com/lh3/psmc>). Based on estimated from the zebra  
26  
27    468     finch genome, an average mutation rate ( $\mu$ ) of  $2.95 \times 10^{-9}$  per base per  
28  
29  
30    469     generation and a generation time (g) of 1 year were used for analysis [68,69].

31           Three-population demographic inference was performed using a diffusion-  
32  
33  
34    471     based approach as implemented in the program  $\partial a \partial i$  [70]. To minimize potential  
35  
36  
37    472     effects of selection that could interfere with demographic inference, these  
38  
39  
40    473     analyses were performed using the subset of noncoding regions across the  
41  
42  
43    474     whole genome and spanning 750,939,264 bp in length. Noncoding SNPs were  
44  
45  
46    475     then thinned to 1% to alleviate potential linkage between the markers. The final  
47  
48  
49    476     dataset consisted of 95,181 SNPs with an average distance of 7,112 bp ( $\pm$   
50  
51  
52    477     18,810 bp) between neighbouring SNPs. To account for missing data, the  
53  
54  
55    478     folded allele frequency spectrum for the three populations (wild, meat and  
56  
57    479     egg/dual purpose breeds) was projected down in  $\partial a \partial i$  to the projection that  
58  
59  
60    480     maximized the number of segregating SNPs, resulting in 92,966 SNPs.

1  
2  
3  
4  
5  
6  
7  
8  
9  
10  
11  
12  
13  
14  
15  
16  
17  
18  
19  
20  
21  
22  
23  
24  
25  
26  
27  
28  
29  
30  
31  
32  
33  
34  
35  
36  
37  
38  
39  
40  
41  
42  
43  
44  
45  
46  
47  
48  
49  
50  
51  
52  
53  
54  
55  
56  
57  
58  
59  
60  
61  
62  
63  
64  
65

---

1 481 We tested four different scenarios to reconstruct the demographic history  
2  
3 482 of the domesticated breeds of mallards: simultaneous domestication of the  
4  
5  
6 483 meat and egg and dual purpose breeds (Model 1); a single domestication event  
7  
8  
9 484 followed by divergence of the meat and egg and dual purpose breeds (Model  
10  
11  
12 485 2); two independent domestication events, with the meat type breed being  
13  
14 486 domesticated first (Model 3); and two independent domestication events, with  
15  
16  
17 487 the egg and dual purpose breed being domesticated first (Model 4). Using the  
18  
19  
20 488 “backbone” of the best model, we then used a step-wise strategy to add  
21  
22  
23 489 parameters related with variation in population sizes and population growth,  
24  
25  
26 490 keeping a new parameter only if the Akaike information criterion (AIC) and log  
27  
28  
29 491 likelihood improved considerably over the previous model with less parameters.  
30  
31 492 In cases where additional parameters resulted in negligibly improved AIC and  
32  
33  
34 493 likelihood, we retained the simpler, less parameterized model. Gene flow was  
35  
36  
37 494 modelled as continuous migration events after population divergence. Each  
38  
39  
40 495 model was run at least ten times from independent starting values to ensure  
41  
42  
43 496 convergence to the same parameter estimates. We rejected models where we  
44  
45  
46 497 failed to obtain convergence across the replicate runs. Scaled parameters for  
47  
48  
49 498 the best-supported model were transformed into real values using the same  
50  
51  
52 499 average mutation rate ( $\mu$ ) and ( $g$ ) as described above for the PSMC analysis.  
53  
54  
55 500 Parameter uncertainty was obtained using the Godambe Information Matrix  
56  
57  
58 501 (GIM) [71] from 100 non-parametric bootstraps.  
59  
60  
61  
62  
63  
64  
65

---

1     502     Selective-sweep analysis

2  
3  
4     503             In order to define candidate regions having undergone directional selection  
5  
6  
7     504     during duck domestication we calculated the coefficient of nucleotide  
8  
9     505     differentiation ( $F_{ST}$ ) between mallards and domesticated ducks described by  
10  
11  
12     506     Weir & Cockerham [72]. We calculated the average  $F_{ST}$  in 10kb windows with  
13  
14  
15     507     a 5 kb shift for all seven domesticated duck populations combined, and two  
16  
17  
18     508     mallard populations combined. Only scaffolds longer than 10 kb, 2368 of 78488  
19  
20  
21     509     scaffolds, were chosen for the analysis. We transformed observed  $F_{ST}$  values  
22  
23  
24     510     to Z transformation ( $Z(F_{ST})$ ) with  $\mu = 0.1154$  and  $\sigma = 0.0678$  according to  
25  
26  
27     511     previously described methods [73].

28  
29     512             To estimate levels of nucleotide diversity ( $\pi$ ) across all sampled  
30  
31  
32     513     populations we used the VCFtools software [74] to calculate  $\theta\pi(\text{wild}/$   
33  
34  
35     514     domesticated) [75], computing the average difference per locus over each pair  
36  
37  
38     515     of accessions. As the measurement of  $F_{ST}$ , averaged  $\pi$  ratio ( $\theta\pi(\text{wild}/$   
39  
40  
41     516     domesticated)) was calculated for each scaffold in 10kb sliding windows.

42  
43     517             Functional classification of GO categories was performed in Database for  
44  
45  
46     518     Annotation, Visualization and Integrated Discovery (DAVID, ver 6.8) [76].  
47  
48  
49     519     Statistical significance was accessed by using a modified Fisher's exact test  
50  
51  
52     520     and Benjamini correction for multiple testing.

53  
54  
55     521     RNA-seq and data processing

56  
57  
58  
59     522             High-quality reads were mapped to reference genome using STAR  
60  
61  
62  
63  
64  
65

---

1 523 (v.2.5.3a) [77]. The *featureCounts* function of the *Rsubread* (v.1.5.2) [78,79]  
2  
3 524 was used to output the counts of reads aligning to each gene. We detected the  
4  
5  
6 525 differential expression genes with edgeR [80-83] using a  $p_{adj} < 0.05$  threshold.  
7  
8  
9

## 10 526 **Data Access**

11  
12  
13  
14 527 All duck sequence data had been submitted to Genome Sequence Archive  
15  
16 528 (GSA) database of BIG Data Center in Beijing Institute of Genomics (BIGD)  
17  
18  
19 529 with accession number of CRA000523.  
20  
21  
22

## 23 530 **Acknowledgments**

24  
25  
26  
27 531 This work was supported by the earmarked fund for the Beijing Innovation  
28  
29  
30 532 Team of the Modern Agro-industry Technology Research System (BAIC04-  
31  
32  
33 533 2017), European Research Council (grant agreement 680951) and Wolfson  
34  
35 534 Merit Award. We gratefully acknowledge our colleagues in the Poultry Team at  
36  
37  
38 535 the National Engineering Laboratory for Animal Breeding of China Agricultural  
39  
40  
41 536 University, for their assistance on sample collection and helpful comments on  
42  
43  
44 537 the manuscript.  
45  
46

## 47 538 **Author contributions**

48  
49  
50  
51 539 Conceived and designed the experiments: Lujiang Qu. Wrote the paper:  
52  
53  
54 540 Zebin Zhang. Revised the paper: Lujiang Qu, Judith E Mank, Marcel van Tuinen.  
55  
56  
57 541 Analyzed the data: Zebin Zhang, Pedro Almeida, Qiong Wang, Yaxiong Jia.  
58  
59  
60 542 Performed the experiments: Zebin Zhang, Yaxiong Jia. Contributed  
61  
62  
63  
64  
65

---

1 543 reagents/materials: Zhihua Jiang, Yu Chen, Kai Zhan, Shuisheng Hou,  
2  
3 544 Zhengkui Zhou, Huifang Li, Fangxi Yang, and Yong He.  
4  
5  
6

7 **545 References**  
8  
9

- 10 546 1. Huang Y, Li Y, Burt DW, Chen H, Zhang Y, et al. (2013) The duck  
11 547 genome and transcriptome provide insight into an avian influenza virus  
12 548 reservoir species. *Nat Genet* 45: 776-783.  
13 549 2. Kiple KF (2000) *The Cambridge world history of food. 2:*  
14 550 *Cambridge University Press.*  
15 551 3. Miller DB (1977) Social displays of Mallard Ducks (*Anas*  
16 552 *platyrhynchos*): effects of domestication. *Journal of Comparative and*  
17 553 *Physiological Psychology* 91: 221.  
18 554 4. Ebinger P (1995) Domestication and plasticity of brain  
19 555 organization in mallards (*Anas platyrhynchos*). *Brain, behavior and*  
20 556 *evolution* 45: 286-300.  
21 557 5. Frahm H, Rehkämper G, Werner C (2001) Brain alterations in  
22 558 crested versus non-crested breeds of domestic ducks (*Anas*  
23 559 *platyrhynchos* fd). *Poultry science* 80: 1249-1257.  
24 560 6. Duggan BM, Hocking PM, Schwarz T, Clements DN (2015)  
25 561 Differences in hindlimb morphology of ducks and chickens: effects of  
26 562 domestication and selection. *Genetics Selection Evolution* 47: 88.  
27 563 7. Tang H, Peng J, Wang P, Risch NJ (2005) Estimation of individual  
28 564 admixture: analytical and study design considerations. *Genet Epidemiol*  
29 565 *28: 289-301.*  
30 566 8. Li H, Durbin R (2011) Inference of human population history from  
31 567 individual whole-genome sequences. *Nature* 475: 493-496.  
32 568 9. Ehlers J, Gibbard PL (2007) The extent and chronology of  
33 569 Cenozoic global glaciation. *Quaternary International* 164: 6-20.  
34 570 10. Yang J, Li WR, Lv FH, He SG, Tian SL, et al. (2016) Whole-  
35 571 Genome Sequencing of Native Sheep Provides Insights into Rapid  
36 572 Adaptations to Extreme Environments. *Mol Biol Evol* 33: 2576-2592.  
37 573 11. Williams MAJ, Dunkerley D, De Deckker P, Kershaw AP, Stokes  
38 574 T (1997) *Quaternary environments: Science Press.*  
39 575 12. Nadachowska-Brzyska K, Li C, Smeds L, Zhang G, Ellegren H  
40 576 (2015) Temporal Dynamics of Avian Populations during Pleistocene  
41 577 Revealed by Whole-Genome Sequences. *Curr Biol* 25: 1375-1380.  
42 578 13. Shapiro MD, Kronenberg Z, Li C, Domyan ET, Pan H, et al.  
43 579 (2013) Genomic diversity and evolution of the head crest in the rock  
44 580 pigeon. *Science* 339: 1063-1067.  
45 581 14. Price TD (2002) Domesticated birds as a model for the genetics  
46 582 of speciation by sexual selection. *Genetica* 116: 311-327.  
47  
48  
49  
50  
51  
52  
53  
54  
55  
56  
57  
58  
59  
60  
61  
62  
63  
64  
65

- 
- 583 15. Li J, Zhang Y (2009) Advances in research of the origin and  
584 domestication of domestic animals. *Biodiversity Science* 17: 319-329.
- 585 16. Li M, Tian S, Jin L, Zhou G, Li Y, et al. (2013) Genomic analyses  
586 identify distinct patterns of selection in domesticated pigs and Tibetan  
587 wild boars. *Nat Genet* 45: 1431-1438.
- 588 17. Jiang Y, Xie M, Chen W, Talbot R, Maddox JF, et al. (2014) The  
589 sheep genome illuminates biology of the rumen and lipid metabolism.  
590 *Science* 344: 1168-1173.
- 591 18. Carneiro M, Rubin CJ, Di Palma F, Albert FW, Alfoldi J, et al.  
592 (2014) Rabbit genome analysis reveals a polygenic basis for phenotypic  
593 change during domestication. *Science* 345: 1074-1079.
- 594 19. Wang MS, Zhang RW, Su LY, Li Y, Peng MS, et al. (2016)  
595 Positive selection rather than relaxation of functional constraint drives  
596 the evolution of vision during chicken domestication. *Cell Res* 26: 556-  
597 573.
- 598 20. Rubin CJ, Zody MC, Eriksson J, Meadows JR, Sherwood E, et  
599 al. (2010) Whole-genome resequencing reveals loci under selection  
600 during chicken domestication. *Nature* 464: 587-591.
- 601 21. Lorenzen ED, Nogués-Bravo D, Orlando L, Weinstock J,  
602 Binladen J, et al. (2011) Species-specific responses of Late Quaternary  
603 megafauna to climate and humans. *Nature* 479: 359-364.
- 604 22. Hewitt G (2000) The genetic legacy of the Quaternary ice ages.  
605 *Nature* 405: 907-913.
- 606 23. Hewitt G (2004) Genetic consequences of climatic oscillations  
607 in the Quaternary. *Philosophical Transactions of the Royal Society of  
608 London B: Biological Sciences* 359: 183-195.
- 609 24. Qiu Q, Wang L, Wang K, Yang Y, Ma T, et al. (2015) Yak whole-  
610 genome resequencing reveals domestication signatures and prehistoric  
611 population expansions. *Nat Commun* 6: 10283.
- 612 25. Orlando L, Ginolhac A, Zhang G, Froese D, Albrechtsen A, et al.  
613 (2013) Recalibrating *Equus* evolution using the genome sequence of an  
614 early Middle Pleistocene horse. *Nature* 499: 74-78.
- 615 26. Steingrimsson E, Copeland NG, Jenkins NA (2004)  
616 Melanocytes and the microphthalmia transcription factor network. *Annu  
617 Rev Genet* 38: 365-411.
- 618 27. Hallsson JH, Hafliadottir BS, Schepsky A, Arnheiter H,  
619 Steingrimsson E (2007) Evolutionary sequence comparison of the *Mitf*  
620 gene reveals novel conserved domains. *Pigment Cell Res* 20: 185-200.
- 621 28. Levy C, Khaled M, Fisher DE (2006) MITF: master regulator of  
622 melanocyte development and melanoma oncogene. *Trends Mol Med* 12:  
623 406-414.
- 624 29. Minvielle F, Bed'hom B, Coville JL, Ito S, Inoue-Murayama M, et  
625 al. (2010) The "silver" Japanese quail and the *MITF* gene: causal  
626 mutation, associated traits and homology with the "blue" chicken

- 
- 627 plumage. *BMC Genet* 11: 15.
- 628 30. Karlsson EK, Baranowska I, Wade CM, Salmon Hillbertz NH,  
629 Zody MC, et al. (2007) Efficient mapping of mendelian traits in dogs  
630 through genome-wide association. *Nat Genet* 39: 1321-1328.
- 631 31. Eriksson M, Nilsson A, Samuelsson H, Samuelsson EB, Mo L,  
632 et al. (2007) On the role of NR3A in human NMDA receptors. *Physiol*  
633 *Behav* 92: 54-59.
- 634 32. Bauer PH, Muller S, Puzicha M, Pippig S, Obermaier B, et al.  
635 (1992) Phosducin Is a Protein Kinase-a-Regulated G-Protein Regulator.  
636 *Nature* 358: 73-76.
- 637 33. Sunayashiki-Kusuzaki K, Kikuchi T, Wawrousek EF, Shinohara  
638 T (1997) Arrestin and phosducin are expressed in a small number of  
639 brain cells. *Brain Res Mol Brain Res* 52: 112-120.
- 640 34. Mignon-Grasteau S, Boissy A, Bouix J, Faure J-M, Fisher AD,  
641 et al. (2005) Genetics of adaptation and domestication in livestock.  
642 *Livestock Production Science* 93: 3-14.
- 643 35. Dugatkin LA, Trut L (2017) *How to Tame a Fox (and Build a Dog):*  
644 *Visionary Scientists and a Siberian Tale of Jump-Started Evolution:*  
645 *University of Chicago Press.*
- 646 36. Axelsson E, Ratnakumar A, Arendt ML, Maqbool K, Webster MT,  
647 et al. (2013) The genomic signature of dog domestication reveals  
648 adaptation to a starch-rich diet. *Nature* 495: 360-364.
- 649 37. Volinia S, Dhand R, Vanhaesebroeck B, MacDougall L, Stein R,  
650 et al. (1995) A human phosphatidylinositol 3-kinase complex related to  
651 the yeast Vps34p-Vps15p protein sorting system. *The EMBO Journal* 14:  
652 3339.
- 653 38. Inaguma Y, Ito H, Iwamoto I, Matsumoto A, Yamagata T, et al.  
654 (2016) Morphological characterization of Class III phosphoinositide 3-  
655 kinase during mouse brain development. *Med Mol Morphol* 49: 28-33.
- 656 39. Stopkova P, Saito T, Papolos DF, Vevera J, Paclt I, et al. (2004)  
657 Identification of PIK3C3 promoter variant associated with bipolar  
658 disorder and schizophrenia. *Biol Psychiatry* 55: 981-988.
- 659 40. Tang R, Zhao X, Fang C, Tang W, Huang K, et al. (2008)  
660 Investigation of variants in the promoter region of PIK3C3 in  
661 schizophrenia. *Neurosci Lett* 437: 42-44.
- 662 41. Zhou X, Wang L, Hasegawa H, Amin P, Han B-X, et al. (2010)  
663 Deletion of PIK3C3/Vps34 in sensory neurons causes rapid  
664 neurodegeneration by disrupting the endosomal but not the autophagic  
665 pathway. *Proceedings of the National Academy of Sciences* 107: 9424-  
666 9429.
- 667 42. Wilson PA, Gardner SD, Lambie NM, Commans SA, Crowther  
668 DJ (2006) Characterization of the human patatin-like phospholipase  
669 family. *Journal of lipid research* 47: 1940-1949.
- 670 43. Kienesberger PC, Oberer M, Lass A, Zechner R (2009)

---

671 Mammalian patatin domain containing proteins: a family with diverse  
672 lipolytic activities involved in multiple biological functions. *Journal of lipid*  
673 *research* 50: S63-S68.

674 44. Tesson C, Nawara M, Salih MA, Rossignol R, Zaki MS, et al.  
675 (2012) Alteration of fatty-acid-metabolizing enzymes affects  
676 mitochondrial form and function in hereditary spastic paraplegia. *The*  
677 *American Journal of Human Genetics* 91: 1051-1064.

678 45. Schuurs-Hoeijmakers JH, Oh EC, Vissers LE, Swinkels ME,  
679 Gilissen C, et al. (2012) Recurrent de novo mutations in PACS1 cause  
680 defective cranial-neural-crest migration and define a recognizable  
681 intellectual-disability syndrome. *The American Journal of Human*  
682 *Genetics* 91: 1122-1127.

683 46. Martin E, Schüle R, Smets K, Rastetter A, Boukhris A, et al.  
684 (2013) Loss of function of glucocerebrosidase GBA2 is responsible for  
685 motor neuron defects in hereditary spastic paraplegia. *The American*  
686 *Journal of Human Genetics* 92: 238-244.

687 47. Gagliano SA, Tiwari AK, Freeman N, Lieberman JA, Meltzer HY,  
688 et al. (2014) Protein kinase cAMP-dependent regulatory type II beta  
689 (PRKAR2B) gene variants in antipsychotic-induced weight gain. *Hum*  
690 *Psychopharmacol* 29: 330-335.

691 48. Czyzyk TA, Sikorski MA, Yang L, McKnight GS (2008) Disruption  
692 of the RII $\beta$  subunit of PKA reverses the obesity syndrome of agouti lethal  
693 yellow mice. *Proceedings of the National Academy of Sciences* 105:  
694 276-281.

695 49. Resources CNCoAG (2010) Animal genetic resources in China  
696 poultry. Beijing: China Agriculture Press.

697 50. Patel RK, Jain M (2012) NGS QC Toolkit: a toolkit for quality  
698 control of next generation sequencing data. *PLoS One* 7: e30619.

699 51. McKenna A, Hanna M, Banks E, Sivachenko A, Cibulskis K, et  
700 al. (2010) The Genome Analysis Toolkit: a MapReduce framework for  
701 analyzing next-generation DNA sequencing data. *Genome Res* 20:  
702 1297-1303.

703 52. DePristo MA, Banks E, Poplin R, Garimella KV, Maguire JR, et  
704 al. (2011) A framework for variation discovery and genotyping using next-  
705 generation DNA sequencing data. *Nat Genet* 43: 491-498.

706 53. Yan Y, Yi G, Sun C, Qu L, Yang N (2014) Genome-wide  
707 characterization of insertion and deletion variation in chicken using next  
708 generation sequencing. *PLoS One* 9: e104652.

709 54. Qu Y, Tian S, Han N, Zhao H, Gao B, et al. (2015) Genetic  
710 responses to seasonal variation in altitudinal stress: whole-genome  
711 resequencing of great tit in eastern Himalayas. *Sci Rep* 5: 14256.

712 55. Meyer RS, Choi JY, Sanches M, Plessis A, Flowers JM, et al.  
713 (2016) Domestication history and geographical adaptation inferred from  
714 a SNP map of African rice. *Nat Genet* 48: 1083-1088.



- 
- 715 56. Russell J, Mascher M, Dawson IK, Kyriakidis S, Calixto C, et al.  
716 (2016) Exome sequencing of geographically diverse barley landraces  
717 and wild relatives gives insights into environmental adaptation. *Nat*  
718 *Genet* 48: 1024-1030.
- 719 57. Mascher M, Schuenemann VJ, Davidovich U, Marom N,  
720 Himmelbach A, et al. (2016) Genomic analysis of 6,000-year-old  
721 cultivated grain illuminates the domestication history of barley. *Nat Genet*  
722 48: 1089-1093.
- 723 58. Li H, Ruan J, Durbin R (2008) Mapping short DNA sequencing  
724 reads and calling variants using mapping quality scores. *Genome Res*  
725 18: 1851-1858.
- 726 59. Cingolani P, Platts A, Wang LL, Coon M, Nguyen T, et al. (2012)  
727 A program for annotating and predicting the effects of single nucleotide  
728 polymorphisms, SnpEff: SNPs in the genome of *Drosophila*  
729 *melanogaster* strain w1118; iso-2; iso-3. *Fly* 6: 80-92.
- 730 60. Purcell S, Neale B, Todd-Brown K, Thomas L, Ferreira MA, et al.  
731 (2007) PLINK: a tool set for whole-genome association and population-  
732 based linkage analyses. *The American Journal of Human Genetics* 81:  
733 559-575.
- 734 61. Chang CC, Chow CC, Tellier LC, Vattikuti S, Purcell SM, et al.  
735 (2015) Second-generation PLINK: rising to the challenge of larger and  
736 richer datasets. *Gigascience* 4: 7.
- 737 62. Yang J, Lee SH, Goddard ME, Visscher PM (2011) GCTA: a tool  
738 for genome-wide complex trait analysis. *The American Journal of*  
739 *Human Genetics* 88: 76-82.
- 740 63. Edgar RC (2004) MUSCLE: multiple sequence alignment with  
741 high accuracy and high throughput. *Nucleic acids research* 32: 1792-  
742 1797.
- 743 64. Plotree D, Plotgram D (1989) PHYLIP-phylogeny inference  
744 package (version 3.2). *cladistics* 5: 6.
- 745 65. Tamura K, Dudley J, Nei M, Kumar S (2007) MEGA4: molecular  
746 evolutionary genetics analysis (MEGA) software version 4.0. *Molecular*  
747 *biology and evolution* 24: 1596-1599.
- 748 66. Kumar S, Stecher G, Tamura K (2016) MEGA7: Molecular  
749 Evolutionary Genetics Analysis Version 7.0 for Bigger Datasets. *Mol Biol*  
750 *Evol* 33: 1870-1874.
- 751 67. Lee TH, Guo H, Wang X, Kim C, Paterson AH (2014) SNPhylo:  
752 a pipeline to construct a phylogenetic tree from huge SNP data. *BMC*  
753 *Genomics* 15: 162.
- 754 68. Zhan X, Pan S, Wang J, Dixon A, He J, et al. (2013) Peregrine  
755 and saker falcon genome sequences provide insights into evolution of a  
756 predatory lifestyle. *Nat Genet* 45: 563-566.
- 757 69. Balakrishnan CN, Edwards SV (2009) Nucleotide variation,  
758 linkage disequilibrium and founder-facilitated speciation in wild

---

759 populations of the zebra finch (*Taeniopygia guttata*). *Genetics* 181: 645-  
760 660.

761 70. Gutenkunst RN, Hernandez RD, Williamson SH, Bustamante  
762 CD (2009) Inferring the joint demographic history of multiple populations  
763 from multidimensional SNP frequency data. *PLoS Genet* 5: e1000695.

764 71. Coffman AJ, Hsieh PH, Gravel S, Gutenkunst RN (2016)  
765 Computationally Efficient Composite Likelihood Statistics for  
766 Demographic Inference. *Molecular Biology and Evolution* 33: 591-593.

767 72. Weir BS, Cockerham CC (1984) Estimating F-Statistics for the  
768 Analysis of Population-Structure. *Evolution* 38: 1358-1370.

769 73. Kreyszig E (2007) *Advanced engineering mathematics*: John  
770 Wiley & Sons.

771 74. Danecek P, Auton A, Abecasis G, Albers CA, Banks E, et al.  
772 (2011) The variant call format and VCFtools. *Bioinformatics* 27: 2156-  
773 2158.

774 75. Tajima F (1983) Evolutionary relationship of DNA sequences in  
775 finite populations. *Genetics* 105: 437-460.

776 76. Huang da W, Sherman BT, Lempicki RA (2009) Systematic and  
777 integrative analysis of large gene lists using DAVID bioinformatics  
778 resources. *Nat Protoc* 4: 44-57.

779 77. Dobin A, Davis CA, Schlesinger F, Drenkow J, Zaleski C, et al.  
780 (2013) STAR: ultrafast universal RNA-seq aligner. *Bioinformatics* 29: 15-  
781 21.

782 78. Liao Y, Smyth GK, Shi W (2013) The Subread aligner: fast,  
783 accurate and scalable read mapping by seed-and-vote. *Nucleic acids*  
784 *research* 41: e108-e108.

785 79. Liao Y, Smyth GK, Shi W (2014) featureCounts: an efficient  
786 general purpose program for assigning sequence reads to genomic  
787 features. *Bioinformatics* 30: 923-930.

788 80. Robinson MD, Smyth GK (2007) Moderated statistical tests for  
789 assessing differences in tag abundance. *Bioinformatics* 23: 2881-2887.

790 81. Robinson MD, McCarthy DJ, Smyth GK (2010) edgeR: a  
791 Bioconductor package for differential expression analysis of digital gene  
792 expression data. *Bioinformatics* 26: 139-140.

793 82. McCarthy DJ, Chen Y, Smyth GK (2012) Differential expression  
794 analysis of multifactor RNA-Seq experiments with respect to biological  
795 variation. *Nucleic Acids Res* 40: 4288-4297.

796 83. Lun AT, Chen Y, Smyth GK (2016) It's DE-licious: a recipe for  
797 differential expression analyses of RNA-seq experiments using quasi-  
798 likelihood methods in edgeR. *Statistical Genomics: Methods and*  
799 *Protocols*: 391-416.

800

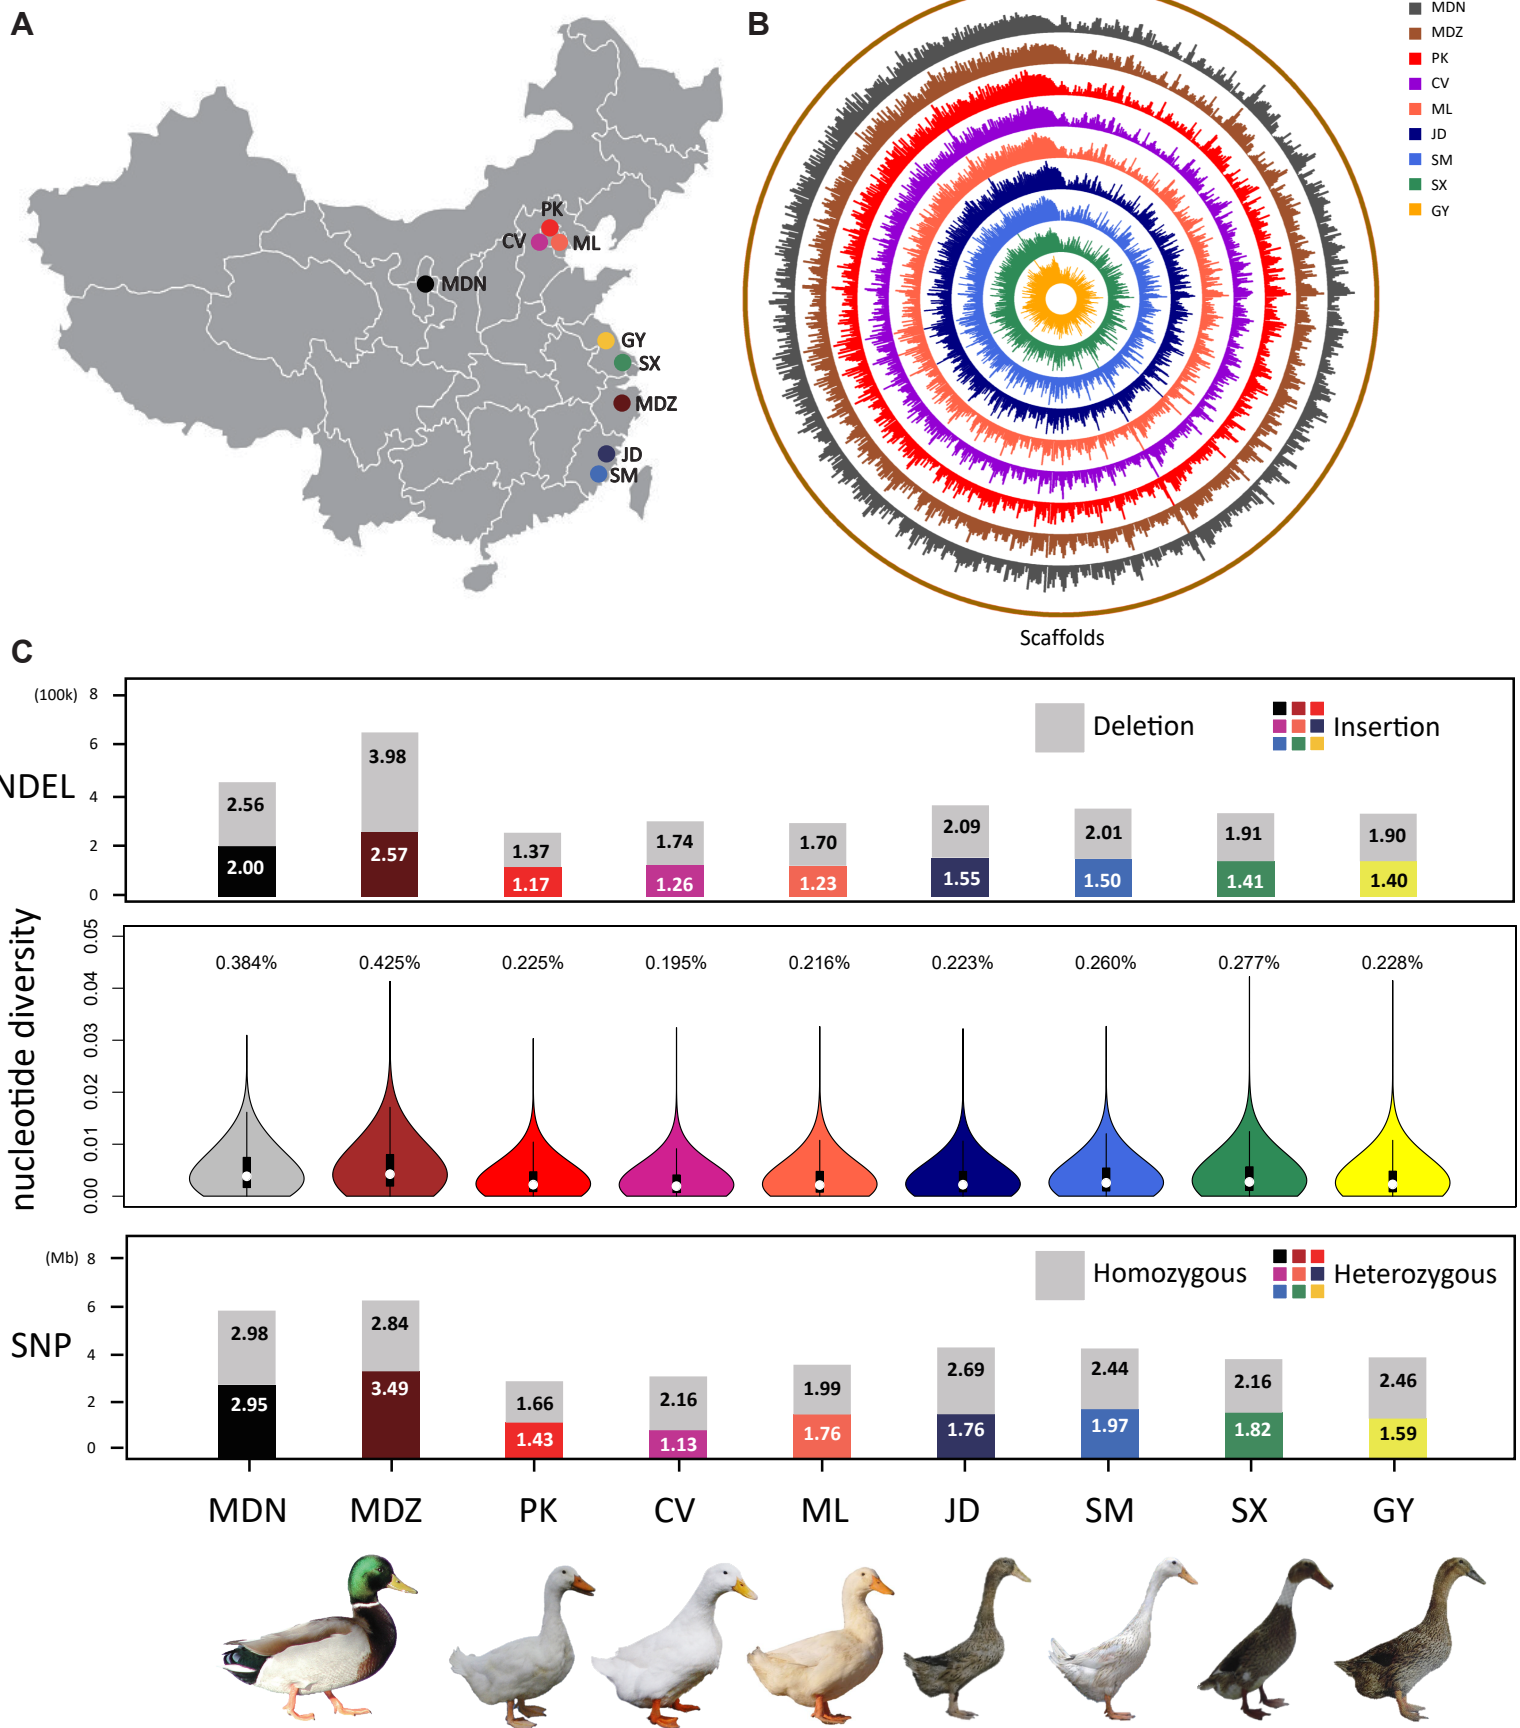

Figure 2

[Click here to download Figure Fig. 2.pdf](#)

**A**

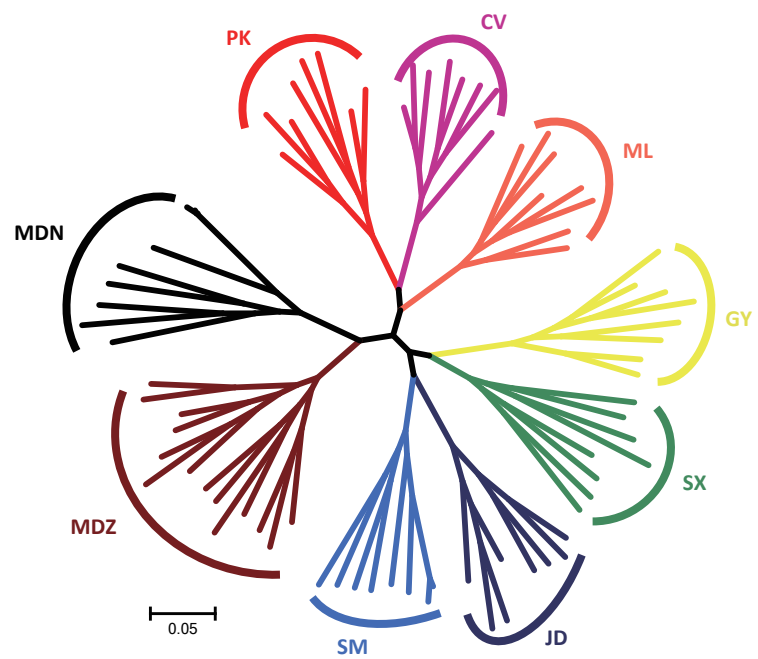

**B**

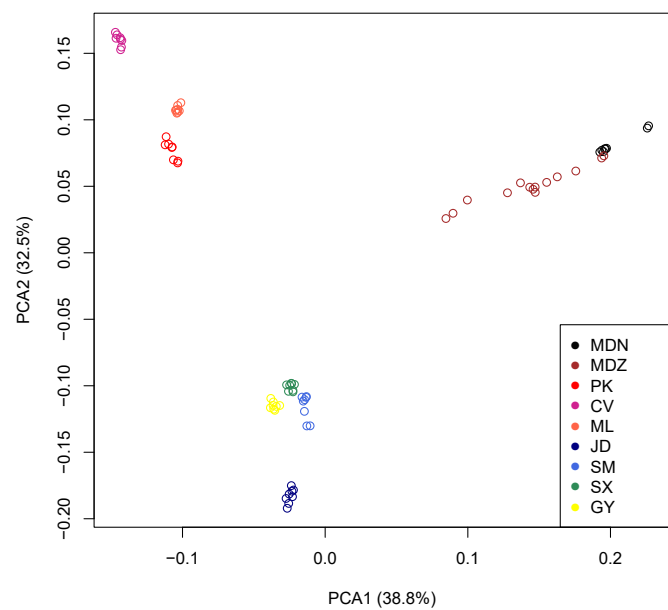

**C**

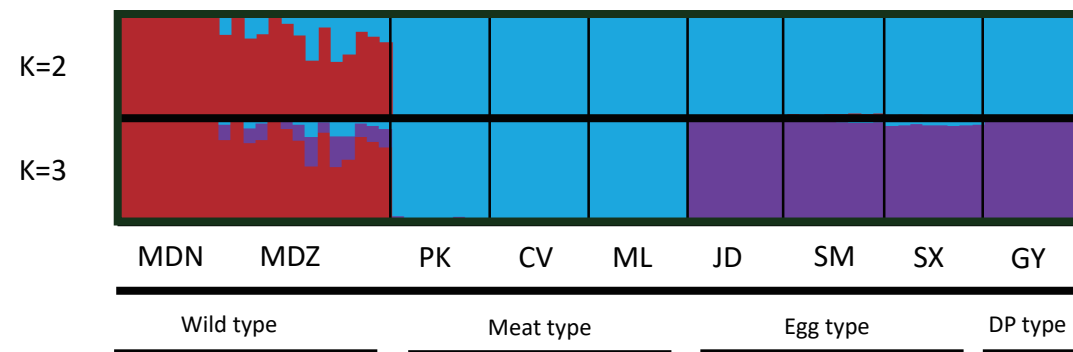

**D**

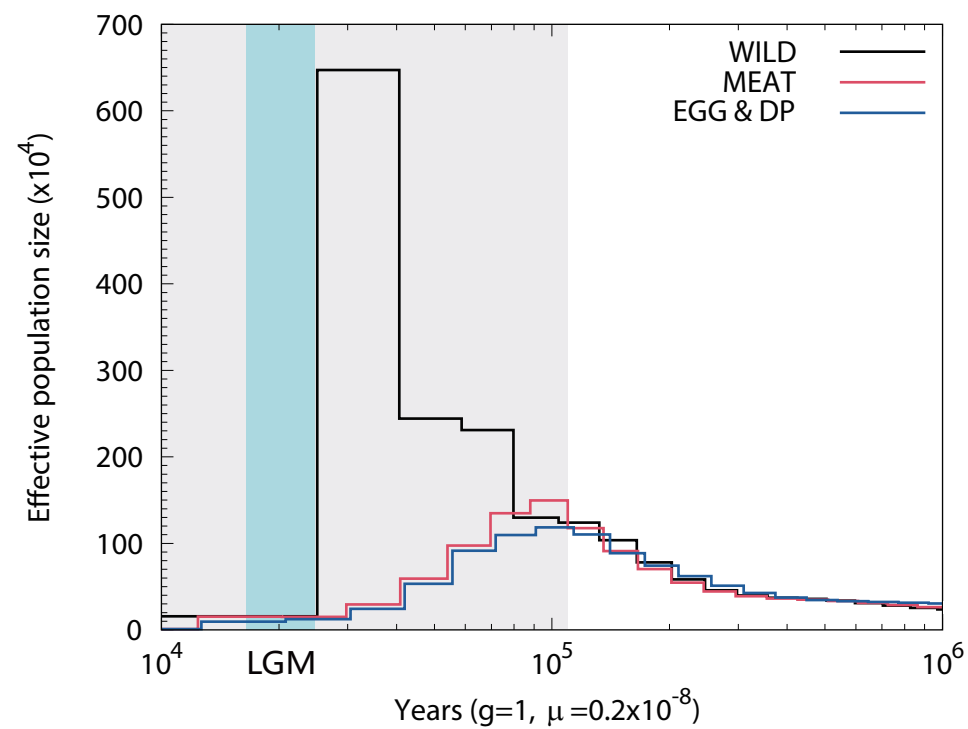

A

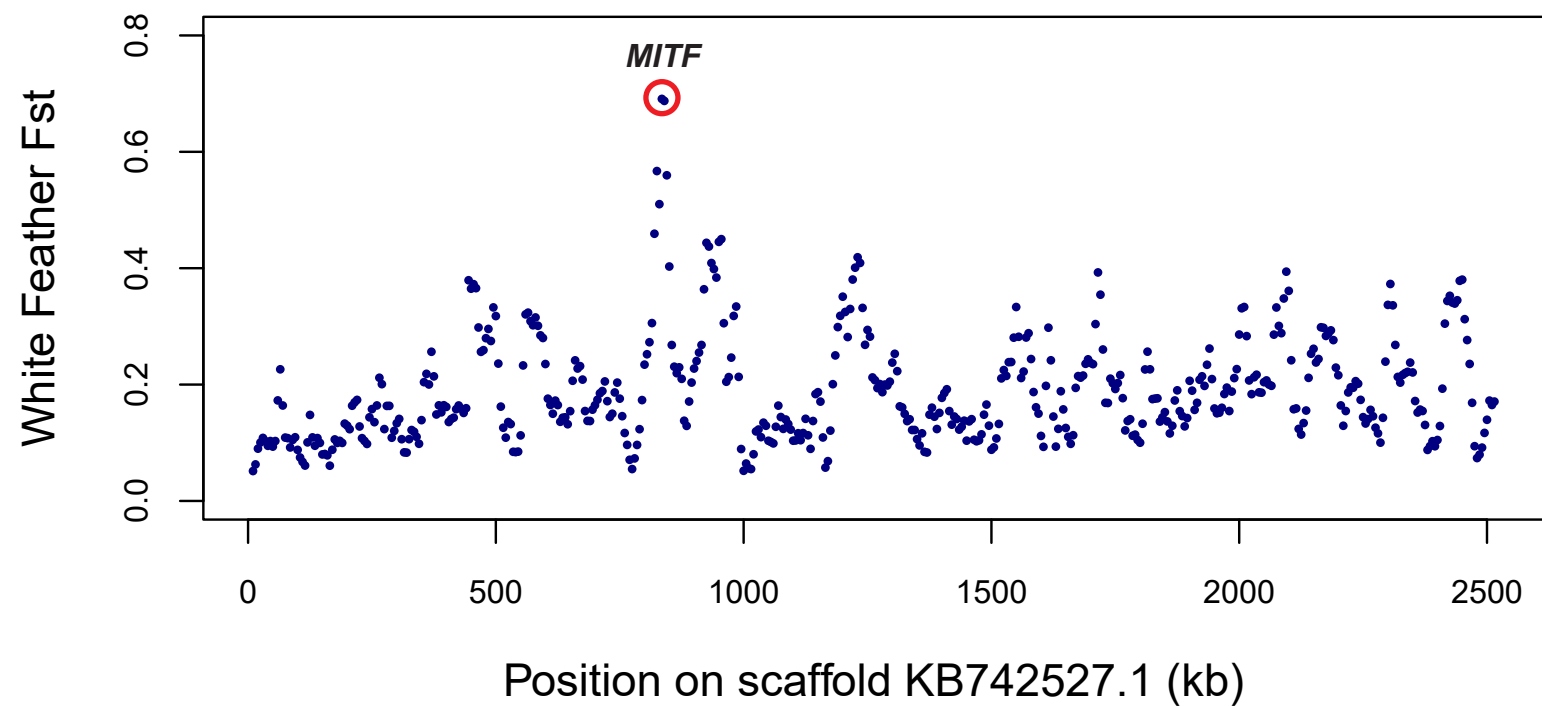

B

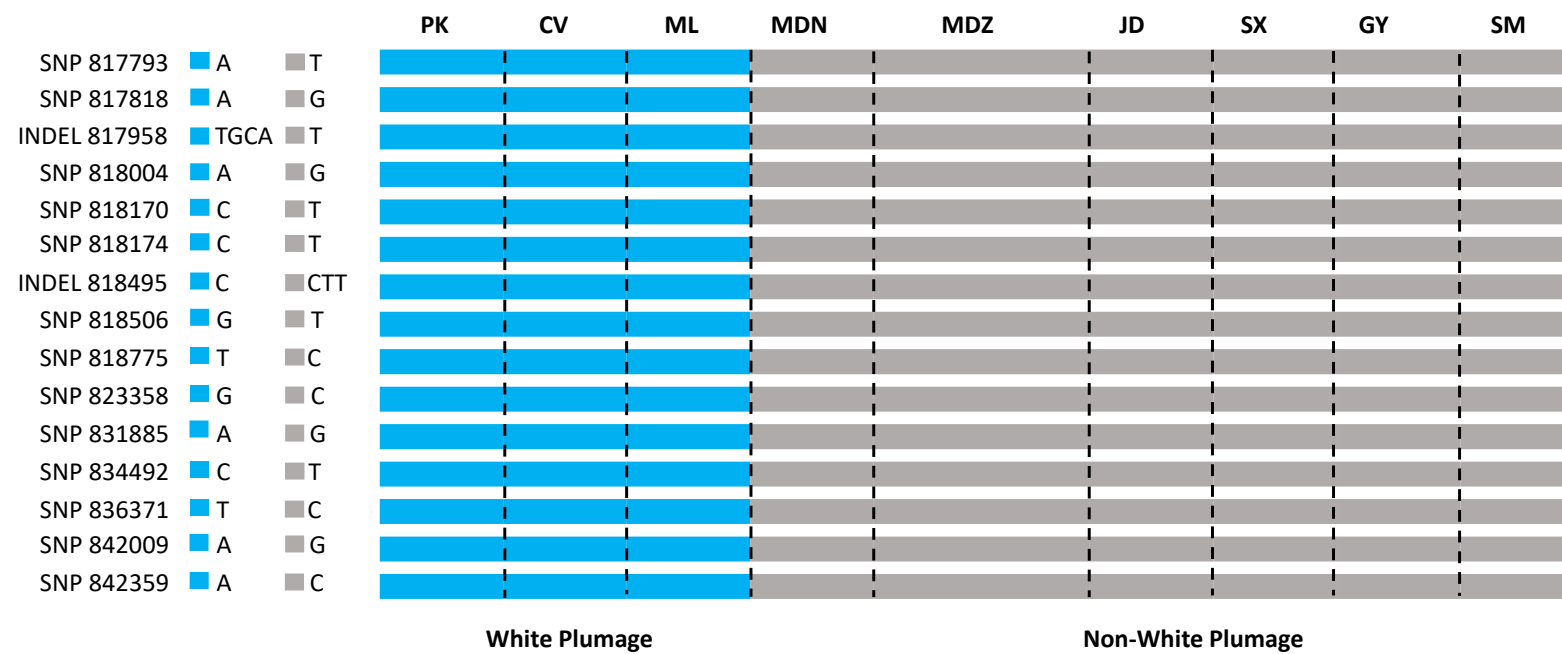



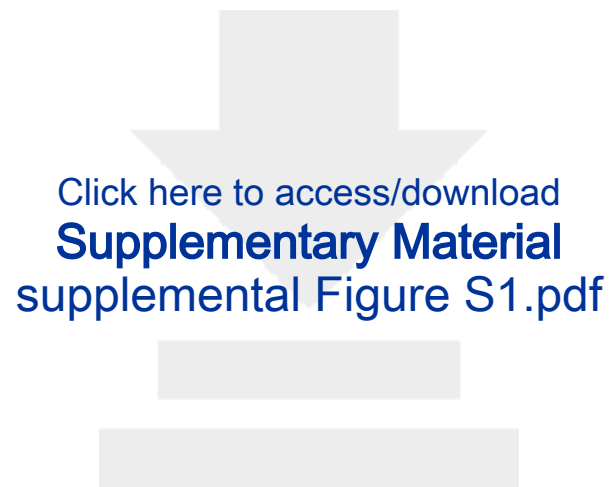

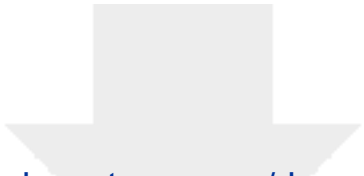

Click here to access/download  
**Supplementary Material**  
supplemental Figure S2.pdf





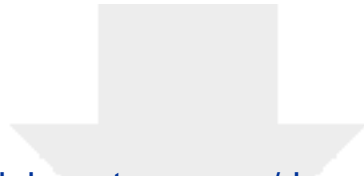

Click here to access/download  
**Supplementary Material**  
Supplemental Figure S3.pdf

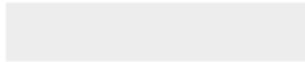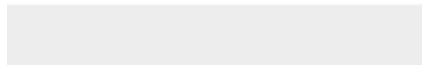



Click here to access/download  
**Supplementary Material**  
Supplemental Figure S4.pdf

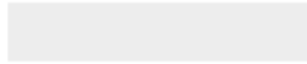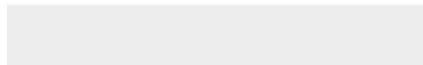

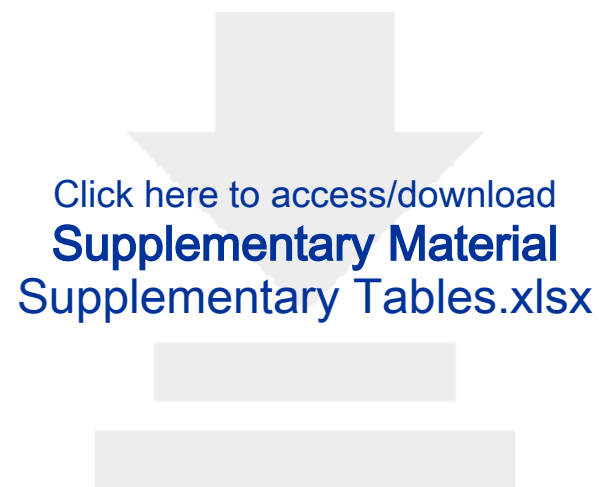

Supplement: giy027_giga-d-17-00301_original_submission.pdf [file giy027_giga-d-17-00301_original_submission.pdf]
