# Supplementary material for: Whole-genome resequencing reveals signatures of selection and timing of duck domestication
Source: PubMed Central journal article supplement (PMC6007426; doi:10.1093/gigascience/giy027), 2018-04-09

## Whole-genome resequencing reveals signatures of selection and timing of duck domestication

--Manuscript Draft--

|                                                      |                                                                                                                                                                                                                                                                                                                                                                                                                                                                                                                                                                                                                                                                                                                                                                                                                                                                                                                                                                                                                                                                                                                       |                   |
|------------------------------------------------------|-----------------------------------------------------------------------------------------------------------------------------------------------------------------------------------------------------------------------------------------------------------------------------------------------------------------------------------------------------------------------------------------------------------------------------------------------------------------------------------------------------------------------------------------------------------------------------------------------------------------------------------------------------------------------------------------------------------------------------------------------------------------------------------------------------------------------------------------------------------------------------------------------------------------------------------------------------------------------------------------------------------------------------------------------------------------------------------------------------------------------|-------------------|
| <b>Manuscript Number:</b>                            | GIGA-D-17-00301R2                                                                                                                                                                                                                                                                                                                                                                                                                                                                                                                                                                                                                                                                                                                                                                                                                                                                                                                                                                                                                                                                                                     |                   |
| <b>Full Title:</b>                                   | Whole-genome resequencing reveals signatures of selection and timing of duck domestication                                                                                                                                                                                                                                                                                                                                                                                                                                                                                                                                                                                                                                                                                                                                                                                                                                                                                                                                                                                                                            |                   |
| <b>Article Type:</b>                                 | Research                                                                                                                                                                                                                                                                                                                                                                                                                                                                                                                                                                                                                                                                                                                                                                                                                                                                                                                                                                                                                                                                                                              |                   |
| <b>Funding Information:</b>                          | Beijing Innovation Team of the Modern Agro-industry Technology Research System (BAIC04-2017)                                                                                                                                                                                                                                                                                                                                                                                                                                                                                                                                                                                                                                                                                                                                                                                                                                                                                                                                                                                                                          | Prof. Lujiang Qu  |
|                                                      | European Research Council (680951)                                                                                                                                                                                                                                                                                                                                                                                                                                                                                                                                                                                                                                                                                                                                                                                                                                                                                                                                                                                                                                                                                    | Dr. Judith E Mank |
|                                                      | Wolfson Merit Award                                                                                                                                                                                                                                                                                                                                                                                                                                                                                                                                                                                                                                                                                                                                                                                                                                                                                                                                                                                                                                                                                                   | Dr. Judith E Mank |
| <b>Abstract:</b>                                     | <p>Background: The genetic basis of animal domestication remains poorly understood, and systems with substantial phenotypic differences between wild and domestic populations are useful for elucidating the genetic basis of adaptation to new environments as well as the genetic basis of rapid phenotypic change. Here, we sequenced the whole genome of 78 individual ducks, from two wild and seven domesticated populations, with an average sequencing depth of 6.42X per individual. Results: Our population and demographic analyses indicate a complex history of domestication, with early selection for separate meat and egg lineages. Genomic comparison of wild to domesticated populations suggest that genes affecting brain and neuronal development have undergone strong positive selection during domestication. Our FST analysis also indicates that the duck white plumage is the result of selection at the melanogenesis associated transcription factor locus. Conclusions: Our results advance the understanding of animal domestication and selection for complex phenotypic traits.</p> |                   |
| <b>Corresponding Author:</b>                         | Lujiang Qu, Ph.D.<br>China Agricultural University<br>Beijing, CHINA                                                                                                                                                                                                                                                                                                                                                                                                                                                                                                                                                                                                                                                                                                                                                                                                                                                                                                                                                                                                                                                  |                   |
| <b>Corresponding Author Secondary Information:</b>   |                                                                                                                                                                                                                                                                                                                                                                                                                                                                                                                                                                                                                                                                                                                                                                                                                                                                                                                                                                                                                                                                                                                       |                   |
| <b>Corresponding Author's Institution:</b>           | China Agricultural University                                                                                                                                                                                                                                                                                                                                                                                                                                                                                                                                                                                                                                                                                                                                                                                                                                                                                                                                                                                                                                                                                         |                   |
| <b>Corresponding Author's Secondary Institution:</b> |                                                                                                                                                                                                                                                                                                                                                                                                                                                                                                                                                                                                                                                                                                                                                                                                                                                                                                                                                                                                                                                                                                                       |                   |
| <b>First Author:</b>                                 | Zebin Zhang                                                                                                                                                                                                                                                                                                                                                                                                                                                                                                                                                                                                                                                                                                                                                                                                                                                                                                                                                                                                                                                                                                           |                   |
| <b>First Author Secondary Information:</b>           |                                                                                                                                                                                                                                                                                                                                                                                                                                                                                                                                                                                                                                                                                                                                                                                                                                                                                                                                                                                                                                                                                                                       |                   |
| <b>Order of Authors:</b>                             | Zebin Zhang                                                                                                                                                                                                                                                                                                                                                                                                                                                                                                                                                                                                                                                                                                                                                                                                                                                                                                                                                                                                                                                                                                           |                   |
|                                                      | Yaxiong Jia                                                                                                                                                                                                                                                                                                                                                                                                                                                                                                                                                                                                                                                                                                                                                                                                                                                                                                                                                                                                                                                                                                           |                   |
|                                                      | Pedro Almeida                                                                                                                                                                                                                                                                                                                                                                                                                                                                                                                                                                                                                                                                                                                                                                                                                                                                                                                                                                                                                                                                                                         |                   |
|                                                      | Judith E Mank                                                                                                                                                                                                                                                                                                                                                                                                                                                                                                                                                                                                                                                                                                                                                                                                                                                                                                                                                                                                                                                                                                         |                   |
|                                                      | Marcel van Tuinen                                                                                                                                                                                                                                                                                                                                                                                                                                                                                                                                                                                                                                                                                                                                                                                                                                                                                                                                                                                                                                                                                                     |                   |
|                                                      | Qiong Wang                                                                                                                                                                                                                                                                                                                                                                                                                                                                                                                                                                                                                                                                                                                                                                                                                                                                                                                                                                                                                                                                                                            |                   |
|                                                      | Zhihua Jiang                                                                                                                                                                                                                                                                                                                                                                                                                                                                                                                                                                                                                                                                                                                                                                                                                                                                                                                                                                                                                                                                                                          |                   |
|                                                      | Yu Chen                                                                                                                                                                                                                                                                                                                                                                                                                                                                                                                                                                                                                                                                                                                                                                                                                                                                                                                                                                                                                                                                                                               |                   |
|                                                      | Kai Zhan                                                                                                                                                                                                                                                                                                                                                                                                                                                                                                                                                                                                                                                                                                                                                                                                                                                                                                                                                                                                                                                                                                              |                   |
|                                                      | Shuisheng Hou                                                                                                                                                                                                                                                                                                                                                                                                                                                                                                                                                                                                                                                                                                                                                                                                                                                                                                                                                                                                                                                                                                         |                   |

|                                                |                                                                                                                                                                                                                                                                                                                                                                                                                                                                                                                                                                                                                                                                                                                                                                                                                                                                                                                                                                                                                                                                                                                                                                                                                                                                                                                                                                                                                                                                                                                                                                                                                                                                                                                                                                                                                                                                                                                                                                                                                                                                                                                                                                                                                                                                                                                                                                                                                                                                                                                                                                                                                                                         |
|------------------------------------------------|---------------------------------------------------------------------------------------------------------------------------------------------------------------------------------------------------------------------------------------------------------------------------------------------------------------------------------------------------------------------------------------------------------------------------------------------------------------------------------------------------------------------------------------------------------------------------------------------------------------------------------------------------------------------------------------------------------------------------------------------------------------------------------------------------------------------------------------------------------------------------------------------------------------------------------------------------------------------------------------------------------------------------------------------------------------------------------------------------------------------------------------------------------------------------------------------------------------------------------------------------------------------------------------------------------------------------------------------------------------------------------------------------------------------------------------------------------------------------------------------------------------------------------------------------------------------------------------------------------------------------------------------------------------------------------------------------------------------------------------------------------------------------------------------------------------------------------------------------------------------------------------------------------------------------------------------------------------------------------------------------------------------------------------------------------------------------------------------------------------------------------------------------------------------------------------------------------------------------------------------------------------------------------------------------------------------------------------------------------------------------------------------------------------------------------------------------------------------------------------------------------------------------------------------------------------------------------------------------------------------------------------------------------|
|                                                | Zhengkui Zhou                                                                                                                                                                                                                                                                                                                                                                                                                                                                                                                                                                                                                                                                                                                                                                                                                                                                                                                                                                                                                                                                                                                                                                                                                                                                                                                                                                                                                                                                                                                                                                                                                                                                                                                                                                                                                                                                                                                                                                                                                                                                                                                                                                                                                                                                                                                                                                                                                                                                                                                                                                                                                                           |
|                                                | Huifang Li                                                                                                                                                                                                                                                                                                                                                                                                                                                                                                                                                                                                                                                                                                                                                                                                                                                                                                                                                                                                                                                                                                                                                                                                                                                                                                                                                                                                                                                                                                                                                                                                                                                                                                                                                                                                                                                                                                                                                                                                                                                                                                                                                                                                                                                                                                                                                                                                                                                                                                                                                                                                                                              |
|                                                | Fangxi Yang                                                                                                                                                                                                                                                                                                                                                                                                                                                                                                                                                                                                                                                                                                                                                                                                                                                                                                                                                                                                                                                                                                                                                                                                                                                                                                                                                                                                                                                                                                                                                                                                                                                                                                                                                                                                                                                                                                                                                                                                                                                                                                                                                                                                                                                                                                                                                                                                                                                                                                                                                                                                                                             |
|                                                | Yong He                                                                                                                                                                                                                                                                                                                                                                                                                                                                                                                                                                                                                                                                                                                                                                                                                                                                                                                                                                                                                                                                                                                                                                                                                                                                                                                                                                                                                                                                                                                                                                                                                                                                                                                                                                                                                                                                                                                                                                                                                                                                                                                                                                                                                                                                                                                                                                                                                                                                                                                                                                                                                                                 |
|                                                | Zhonghua Ning                                                                                                                                                                                                                                                                                                                                                                                                                                                                                                                                                                                                                                                                                                                                                                                                                                                                                                                                                                                                                                                                                                                                                                                                                                                                                                                                                                                                                                                                                                                                                                                                                                                                                                                                                                                                                                                                                                                                                                                                                                                                                                                                                                                                                                                                                                                                                                                                                                                                                                                                                                                                                                           |
|                                                | Ning Yang                                                                                                                                                                                                                                                                                                                                                                                                                                                                                                                                                                                                                                                                                                                                                                                                                                                                                                                                                                                                                                                                                                                                                                                                                                                                                                                                                                                                                                                                                                                                                                                                                                                                                                                                                                                                                                                                                                                                                                                                                                                                                                                                                                                                                                                                                                                                                                                                                                                                                                                                                                                                                                               |
|                                                | Lujiang Qu, Ph.D.                                                                                                                                                                                                                                                                                                                                                                                                                                                                                                                                                                                                                                                                                                                                                                                                                                                                                                                                                                                                                                                                                                                                                                                                                                                                                                                                                                                                                                                                                                                                                                                                                                                                                                                                                                                                                                                                                                                                                                                                                                                                                                                                                                                                                                                                                                                                                                                                                                                                                                                                                                                                                                       |
| <b>Order of Authors Secondary Information:</b> |                                                                                                                                                                                                                                                                                                                                                                                                                                                                                                                                                                                                                                                                                                                                                                                                                                                                                                                                                                                                                                                                                                                                                                                                                                                                                                                                                                                                                                                                                                                                                                                                                                                                                                                                                                                                                                                                                                                                                                                                                                                                                                                                                                                                                                                                                                                                                                                                                                                                                                                                                                                                                                                         |
| <b>Response to Reviewers:</b>                  | <p>Dear Dr Zauner,</p> <p>Many thanks for your positive comments about our manuscript, "Whole-genome resequencing reveals signatures of selection and timing of duck domestication" (manuscript number GIGA-D-17-00301R1). We also thank the reviewers for their thoughtful and constructive suggestions. We have addressed all these comments, detailed below, in our revised manuscript, which we hope is now suitable for publication in GigaScience.</p> <p>Sincerely,<br/>Lujiang Qu, Ph.D., on behalf of all co-authors.<br/>Email: quluj@163.com<br/>Department of Animal Genetics and Breeding, College of Animal Science and Technology, China Agricultural University, Beijing 100193, China</p> <p>GIGA-D-17-00301R1<br/>Whole-genome resequencing reveals signatures of selection and timing of duck domestication<br/>Zebin Zhang; Yaxiong Jia; Pedro Almeida; Judith E Mank; Marcel van Tuinen; Qiong Wang; Zihua Jiang; Yu Chen; Kai Zhan; Shuisheng Hou; Zhengkui Zhou; Huifang Li; Fangxi Yang; Yong He; Zhonghua Ning; Ning Yang; Lujiang Qu, Ph.D.<br/>GigaScience</p> <p>Dear Prof. Qu,</p> <p>Your revised manuscript "Whole-genome resequencing reveals signatures of selection and timing of duck domestication" (GIGA-D-17-00301R1) has been assessed again by our reviewers.</p> <p>I am happy that the reviewers feel that many of their previous comments have been addressed and the manuscript has improved. However, some issues remain to be clarified, and I urge you to fully address the latest comments in a second revised manuscript.</p> <p>Please see the reviewers' reports below.</p> <p>Comment: Please pay particular attention to the comments of reviewer 1 regarding availability of population genetics raw data, coordinates of sweeps, scripts, etc, as well as full step-by-step description of all wet and dry lab protocols. As I explained in my previous decision letter, reproducibility of methods and full data availability are of utmost importance for acceptance in GigaScience.</p> <p>Reply: Many thanks for your comment. All population genetic raw data and command scripts have been submitted to the GigaDB database according to reviewer 1 and your suggestion. We also add the description of all wet and dry protocols to our current manuscript, please see specific replies below.</p> <p>As mentioned previously, the protocols.io platform is a very convenient way to share experimental protocols, and I recommend you to consider this option. Please do let me know if you have questions regarding how we can integrate protocols.io entries with your manuscript.</p> |

Our data curators will contact you to prepare the GigaDB set that will be posted alongside your manuscript, if it is accepted.

Please include a citation to your GigaDB dataset (including the DOI link) to your reference list, and cite this in the data availability section and elsewhere in the manuscript, where appropriate.

Please follow this example format for the reference:

[xx] Author1 N, Author2 N, AuthorX N. Supporting data for "Title of your manuscript". GigaScience Database 2018. <http://dx.doi.org/xxxxxx>

(We will replace the dummy doi (xxxx) with the final version prior to acceptance).

Once you have made the necessary corrections, please submit a revised manuscript online at:

<https://giga.editorialmanager.com/>

If you have forgotten your username or password please use the "Send Login Details" link to get your login information. For security reasons, your password will be reset.

Please include a point-by-point within the 'Response to Reviewers' box in the submission system.

Please also ensure that your revised manuscript conforms to the journal style, which can be found in the Instructions for Authors on the journal homepage.

The due date for submitting the revised version of your article is 15 May 2018.

We look forward to receiving your revised manuscript soon.

Best wishes,

Hans Zauner  
GigaScience  
[www.gigasciencejournal.com](http://www.gigasciencejournal.com)

Reviewer reports:

Reviewer #1: In my opinion, this revision adequately answers most of my comments. The manuscript has also improved with the answers to the other reviewer.

I have only a few remaining comments. The most serious one is about data availability and protocols.

Comment: The revision comes with better data availability. VCF files of variants are included, plus a couple of perl scripts used to process them. However, full population genetic statistics and sweep locations still seem to be missing. Scripts for running the bioinformatic tools are not included. The description of the PCR follow-up of variants has been expanded. However, the description does not include the full protocol, and neither does the description of any of the other laboratory methods. This level of detail is about the standard in the field, but it does not seem to live up to the policies of the journal.

Reply: Many thanks for your positive comments and apologies for any inadequate descriptions. All population genetic raw data and command scripts have been submitted to the GigaDB database.

We used a sliding windows method for FST calculation in our sweep analysis, as this approach is more robust and informative for genome-wide evaluation. This approach means that one window might have several genes, and some very long genes may be present in multiple overlapping windows. Thus, we substituted sweep locations for gene locations, and added this information to our current manuscript, please see supplemental tables S5 and S8.

We have provided a citation for the specific PCR validation methods (Van et al 2008), which has been widely used in previous studies (Wang et al 2016, Yan et al 2014), please see line 536.

Van Tassell, C. P., et al. (2008). "SNP discovery and allele frequency estimation by deep sequencing of reduced representation libraries." *Nat Methods* 5(3): 247-252.  
Wang, M. S., et al. (2016). "Positive selection rather than relaxation of functional constraint drives the evolution of vision during chicken domestication." *Cell Res* 26(5): 556-573.  
Yan, Y., et al. (2014). "Genome-wide characterization of insertion and deletion variation in chicken using next generation sequencing." *PLoS One* 9(8): e104652.

Comment: A couple of times (the justification for the mix of sequence coverages, and the detail about the origin of the ducks), the reply to reviewers contain useful information that was not incorporated in the manuscript. In my opinion, the Methods should include this information, and in particular as much detail as possible about the origin of the animals.

Reply: Many thanks for your suggestion. We have add the justification of coverage to the Methods section of our current manuscript, please see lines 486-490. We have also detailed the point of origin for our samples, please see lines 468-474.

Minor comments

Comment: The reply to reviewers describe the variant filtering as "extremely strict". In fact, it seems to be mostly the default starting criteria suggested by GATK developers in their "best practices" (with a "QUAL" cutoff and a higher "QD" cutoff). How were these filter settings chosen? Are they actually "extremely strict"?

Reply: Many thanks for your questions. Of course, all variants were filtered with "hard filter" criteria suggested by GATK developers. However, to identify variants associated with white plumage traits, the "extremely strict" criteria were used, where variant allele frequency must be 0 in all white duck individuals and be 1 in all non-white duck individuals. Or, 1 in all white duck individuals and 0 in all non-white duck individuals. In other words, the variant had to be completely associated with the phenotype to pass our strictest threshold.

Comment: Line 247: What does "completely associated with selection" mean in this context?

Reply: Thanks for your question. "The duck white plumage is completely associated with selection at the MITF locus" means the mutations were completely associated with white plumage phenotype.

Comment: Lines 252-253: In what sense did the PCR primer design fail? Were you unable to amplify the region, amplify specifically, or unable to find primers that lived up to your quality criteria? I fully understand that PCR primer design fails occasionally, but I think a more specific description would be useful.

Reply: We were unable to design suitable primers to amplify this region, and we add this explanation to our current manuscript, please see line 270.

Reviewer #2: The revised version of the manuscript entitled, "Whole-genome resequencing reveals signatures of selection and timing of duck domestication" tackles the genomic question of domestication. The authors have done much to improve the manuscript. While most of my comments are now minor, there are a few additional requests that would be nice to see incorporated in order to strengthen the manuscript. I believe that the paper will be ready for submission if the authors incorporate all/most comments (See below).

Comment: INTRODUCTION/DATA DESCRIPTION: I think the introduction is much improved. In addition to minor comments below, I would still like to see the authors develop at least one hypothesis as to what genes/genetic regions may be playing a



role in the meat/egg domestication process of these ducks. Alternatively (or in addition to), I would like to see a hypothesis regarding what they think some of the differences may be between wild and domesticated populations.

Reply: Thank you very much for your positive comments. Respectfully, the advantage of comparative genomic studies such as ours is that they are agnostic screens of the entire genome without a priori need to develop specific hypotheses. Previous similar studies of domestication (including Rubin et al. Nature 2010; Vonholdt et al. Nature 2010; Montague et al. PNAS 2014, among many others) have used these approaches to identify regions of the genome affected by artificial selection without a priori hypotheses. We adapted these approaches to the study of ducks here, with the broad aim of identifying whether ducks were domesticated once (null hypothesis) or separately for egg and meat breeds (alternative hypothesis). Moreover, we assess the role of domestication on genes related to plumage and neuroanatomy. We respectfully suggest that to develop further post hoc hypotheses to fit our results at this point would be disingenuous, and defeat the purpose of these sorts of agnostic screens.

Rubin, C. J., et al. (2010). "Whole-genome resequencing reveals loci under selection during chicken domestication." Nature 464(7288): 587-591.

Vonholdt, B. M., et al. (2010). "Genome-wide SNP and haplotype analyses reveal a rich history underlying dog domestication." Nature 464(7290): 898-902.

Montague, M. J., et al. (2014). "Comparative analysis of the domestic cat genome reveals genetic signatures underlying feline biology and domestication." Proceedings of the National Academy of Sciences 111(48): 17230-17235.

Comment: Line 63: remove scientific name as you already introduced mallards in the previous paragraph.

Reply: Done! Please see line 72.

Comment: Line 92: insert "of" - "...613.37 [of] Gb high...". I would also advise the authors to move any kind of findings of this type to RESULTS.

Reply: Done! Please see lines 89-91, 111-112.

Comment: Lines 94: Delete "we detected"

Reply: Done! Please see line 92.

Comment: Line 94: consider change " ...,we tested for population structure between domesticated and wild populations, as well as assessed for signatures of selection associated with domestication."

Reply: Many thanks for your helpful suggestion. We have revised our manuscript accordingly, please see lines 92-96.

Comment: Line 96-98: Either delete the sentence starting with "We inferred..." or add another 1-2 sentence explaining what exactly you tested.

Reply: Deleted! Please see line 95-97.

Comment: Lines 104-109: This seems forced and out of place. Either delete it and put it to the discussion OR expand/edit it to be more streamlined.

Reply: This paragraph have been moved to discussion section, please see lines 100-105, and 449-454.

ANALYSIS:

Comment: Line 117: end with "...78 ducks."

Reply: Done! Please see line 113.

Comment: 2nd Paragraph: "Across samples, a total of 36.1 million (M) SNPs (average

per sample = 4.5 M SNPs; range = 2.34 - 9.52 M SNPs) and 3.1M INDELs (average per sample = 0.4M INDELs; range = 0.21 - 0.89M INDELs) were detected (Fig. 1C1B, Supplemental Figs. S1-S2, Supplemental Table S2). Single base-pair INDELs were the predominant form, and accounting for 38.63% of all detected INDELs (Supplemental Table S3). Our dataset covers 96.2% of the duck dbSNP database deposited in the Genome Variation Map (GVM) (<http://bigd.big.ac.cn/gvm/>). In general, domesticated stock showed lower number of SNPs (t test,  $p = 3.13 \times 10^{-12}$ ) and nucleotide diversity (ttest,  $p = 2.20 \times 10^{-16}$ ) as compared to wild mallards (Fig. 1B - C). Moreover, homozygosity in domesticated ducks was significantly higher than ratios in wild mallards (t test,  $p = 1.35 \times 10^{-10}$ ) consistent with the larger panmictic wild population.

Reply: Thank you so much for your helpful suggestion. This paragraph was revised accordingly, please see lines 126-151.

Comment: Line 137: does 36.1 million SNPs include indels? If not, I would just include the 2 in one summation of total diversity.

Reply: Many thanks for your question and helpful suggestion, the 36.1 million SNPs did not include INDELs. These two variation types are summed together according to your suggestion in our current manuscript, please see line 127.

Comment: Line 142 - 143: The sentence "Single base-pair INDELs were the predominant form, accounting for 38.63% of all detected INDELs (Supplemental Table S3)."

Reply: Revised! Please see lines 131-132.

Comment: Line 148: Are you sure that your data is "consistent with larger panmictic wild population" ? What about artificial selection and inbreeding within domesticated stock? Maybe both? Consider revising.

Reply: Apologies for any confusion. We had revised our manuscript accordingly, please see lines 138-140.

Comment: Lines 155 - 158: Consider changing the sentence to: "In general, clustering among samples corresponded with their source, that included wild ducks (MDN and MDZ), ducks domesticated for meat production (PK, CV, and ML), and ducks domesticated for egg production (JD, 157 SM, and SX). The dual-purpose domesticate clustered with ducks domesticated for egg production (Fig. 2B-C)."

Reply: Done! Please see lines 156-160.

Comment: Lines 184-202: Consider revising to 1 paragraph: "Next, we explored the demographic history of our samples to differentiate whether domestication of meat and egg producing ducks was the result of one or multiple events. First, we estimated changes in effective population size ( $N_e$ ) in our three genetic clusters in a pairwise sequentially Markovian coalescent (PSMC) framework [22]. The meat type ducks (PK, CV, and ML) showed concordant demographic trajectories with egg and mixture dual-purpose type populations (JD, SM, SX, and GY) with one apparent expansion around the Penultimate Glaciation Period (PGP, 0.30-0.13 Mya) [4, 23] and Last Glacial Period (LGP, 110-12 kya) [24, 25], followed by a subsequent contraction (Fig. 2D). Next, we tested multiple demographic scenarios ...."

Reply: Done! Please see lines 187-208.

Comment: Line 214: What is the  $N_e$  for the wild population. Please make clear by at least referencing Table 1.

Reply: Thank you for this helpful suggestion. We have had add the  $N_e$  estimate of the wild population to our main text, please see line 225.

Comment: Lines 224-229: Please cite sources for some of your statements here. Better to make the statement of your findings and save lines 226-229 for discussion.

|                                                                                                                                                                                                                                                                                                                                                                                   |                                                                                                                                                                                                                                                                                                                                                                                                                                                                                                                                                                                                                                                                                                                                                                                                                                                                                                                                                                                                                                                                                                                                                                                                                                                                                                   |
|-----------------------------------------------------------------------------------------------------------------------------------------------------------------------------------------------------------------------------------------------------------------------------------------------------------------------------------------------------------------------------------|---------------------------------------------------------------------------------------------------------------------------------------------------------------------------------------------------------------------------------------------------------------------------------------------------------------------------------------------------------------------------------------------------------------------------------------------------------------------------------------------------------------------------------------------------------------------------------------------------------------------------------------------------------------------------------------------------------------------------------------------------------------------------------------------------------------------------------------------------------------------------------------------------------------------------------------------------------------------------------------------------------------------------------------------------------------------------------------------------------------------------------------------------------------------------------------------------------------------------------------------------------------------------------------------------|
|                                                                                                                                                                                                                                                                                                                                                                                   | <p>Reply: Many thanks for your comments. We have moved lines 226-229 to the discussion section according as suggested, please see lines 387-390.</p> <p>Comment: Line 241: I would like to know if any other region showed deviation/outliers? Or was there only 1 region across the entire genome? Please clarify.</p> <p>Reply: Many thanks for your questions. This region is the fourth ranked region across the entire genome, but the only one region correlated with coloration. We also revised our current manuscript, please see lines 251-261.</p> <p>Comment: DISCUSSION: Overall, the discussion is well written, organized, and I find the topics of broad appeal.</p> <p>I believe the introduction of the Discussion can be combined into a single paragraph and a bit streamlined as it is just reiterating the results.</p> <p>Reply: Thank you so much for your positive comment and your helpful suggestion. The introduction of the Discussion have been revised and redundant material deleted as you suggest, please see lines 348-363.</p> <p>Comment: Lines 348 - 353: Consider splitting into at least 2 sentences.</p> <p>Reply: Done! Please see lines 357-363.</p> <p>Comment: Line 419: add "and": "dogs [45], and..."</p> <p>Reply: Done! Please see line 433.</p> |
| <b>Additional Information:</b>                                                                                                                                                                                                                                                                                                                                                    |                                                                                                                                                                                                                                                                                                                                                                                                                                                                                                                                                                                                                                                                                                                                                                                                                                                                                                                                                                                                                                                                                                                                                                                                                                                                                                   |
| <b>Question</b>                                                                                                                                                                                                                                                                                                                                                                   | <b>Response</b>                                                                                                                                                                                                                                                                                                                                                                                                                                                                                                                                                                                                                                                                                                                                                                                                                                                                                                                                                                                                                                                                                                                                                                                                                                                                                   |
| Are you submitting this manuscript to a special series or article collection?                                                                                                                                                                                                                                                                                                     | No                                                                                                                                                                                                                                                                                                                                                                                                                                                                                                                                                                                                                                                                                                                                                                                                                                                                                                                                                                                                                                                                                                                                                                                                                                                                                                |
| <b>Experimental design and statistics</b>                                                                                                                                                                                                                                                                                                                                         | Yes                                                                                                                                                                                                                                                                                                                                                                                                                                                                                                                                                                                                                                                                                                                                                                                                                                                                                                                                                                                                                                                                                                                                                                                                                                                                                               |
| <p>Full details of the experimental design and statistical methods used should be given in the Methods section, as detailed in our <a href="#">Minimum Standards Reporting Checklist</a>. Information essential to interpreting the data presented should be made available in the figure legends.</p> <p>Have you included all the information requested in your manuscript?</p> |                                                                                                                                                                                                                                                                                                                                                                                                                                                                                                                                                                                                                                                                                                                                                                                                                                                                                                                                                                                                                                                                                                                                                                                                                                                                                                   |
| <b>Resources</b>                                                                                                                                                                                                                                                                                                                                                                  | Yes                                                                                                                                                                                                                                                                                                                                                                                                                                                                                                                                                                                                                                                                                                                                                                                                                                                                                                                                                                                                                                                                                                                                                                                                                                                                                               |
| <p>A description of all resources used, including antibodies, cell lines, animals and software tools, with enough information to allow them to be uniquely identified, should be included in the Methods section. Authors are strongly encouraged to cite <a href="#">Research Resource Identifiers</a> (RRIDs) for antibodies, model organisms and tools, where possible.</p>    |                                                                                                                                                                                                                                                                                                                                                                                                                                                                                                                                                                                                                                                                                                                                                                                                                                                                                                                                                                                                                                                                                                                                                                                                                                                                                                   |

|                                                                                                                                                                                                                                                                                                                                                                                                                                                                                                                                                         |            |
|---------------------------------------------------------------------------------------------------------------------------------------------------------------------------------------------------------------------------------------------------------------------------------------------------------------------------------------------------------------------------------------------------------------------------------------------------------------------------------------------------------------------------------------------------------|------------|
| <p>Have you included the information requested as detailed in our <a href="#">Minimum Standards Reporting Checklist</a>?</p>                                                                                                                                                                                                                                                                                                                                                                                                                            |            |
| <p><b>Availability of data and materials</b></p> <p>All datasets and code on which the conclusions of the paper rely must be either included in your submission or deposited in <a href="#">publicly available repositories</a> (where available and ethically appropriate), referencing such data using a unique identifier in the references and in the “Availability of Data and Materials” section of your manuscript.</p> <p>Have you have met the above requirement as detailed in our <a href="#">Minimum Standards Reporting Checklist</a>?</p> | <p>Yes</p> |

---

1 **Whole-genome resequencing reveals signatures of**  
2 **selection and timing of duck domestication**

3 Zebin Zhang <sup>†,1</sup>, Yaxiong Jia<sup>†,2</sup>, Pedro Almeida<sup>3</sup>, Judith E Mank<sup>3,4</sup>, Marcel van  
4 Tuinen<sup>5</sup>, Qiong Wang<sup>1</sup>, Zhihua Jiang<sup>6</sup>, Yu Chen<sup>7</sup>, Kai Zhan<sup>8</sup>, Shuisheng Hou<sup>2</sup>,  
5 Zhengkui Zhou<sup>2</sup>, Huifang Li<sup>9</sup> Fangxi Yang<sup>10</sup>, Yong He<sup>11</sup>, Zhonghua Ning<sup>1</sup>, Ning  
6 Yang<sup>1</sup>, and Lujiang Qu<sup>1\*</sup>

7 <sup>1</sup>Department of Animal Genetics and Breeding, National Engineering  
8 Laboratory for Animal Breeding, College of Animal Science and Technology,  
9 China Agricultural University, Beijing, China

10 <sup>2</sup>Institute of Animal Science, Chinese Academy of Agricultural Sciences, Beijing,  
11 China

12 <sup>3</sup>Department of Genetics, Evolution and Environment, University College  
13 London, London, UK

14 <sup>4</sup>Department of Organismal Biology, Evolutionary Biology Centre, Uppsala  
15 University, Uppsala, Sweden

16 <sup>5</sup>Centre of Evolutionary and Ecological Studies, Marine Evolution and  
17 Conservation Group, University of Groningen, Groningen, The Netherlands

18 <sup>6</sup>Department of Animal Sciences, Center for Reproductive Biology, Veterinary  
19 and Biomedical Research Building, Washington State University, Pullman,  
20 United States

21 <sup>7</sup>Beijing Municipal General Station of Animal Science, Beijing, China

1  
2  
3  
4  
5  
6  
7  
8  
9  
10  
11  
12  
13  
14  
15  
16  
17  
18  
19  
20  
21  
22  
23  
24  
25  
26  
27  
28  
29  
30  
31  
32  
33  
34  
35  
36  
37  
38  
39  
40  
41  
42  
43  
44  
45  
46  
47  
48  
49  
50  
51  
52  
53  
54  
55  
56  
57  
58  
59  
60  
61  
62  
63  
64  
65

- 
- 1 22 <sup>8</sup>Institute of Animal Husbandry and Veterinary Medicine, Anhui Academy of  
2  
3 23 Agricultural Sciences, Hefei, China  
4  
5  
6 24 <sup>9</sup>Poultry Institute, Chinese Academy of Agriculture Science, Yangzhou, China  
7  
8  
9 25 <sup>10</sup>Institute of Pekin Duck, Beijing, China  
10  
11 26 <sup>11</sup>Cherry Valley farms (xianghe) Co.,Ltd, Langfang, China  
12  
13  
14 27 †These authors contributed equally to this work.  
15  
16  
17 28 \*Corresponding authors: [guluj@163.com](mailto:guluj@163.com)  
18  
19  
20  
21  
22  
23  
24  
25  
26  
27  
28  
29  
30  
31  
32  
33  
34  
35  
36  
37  
38  
39  
40  
41  
42  
43  
44  
45  
46  
47  
48  
49  
50  
51  
52  
53  
54  
55  
56  
57  
58  
59  
60  
61  
62  
63  
64  
65

---

1 29 **Abstract**

2  
3  
4 30 **Background:** The genetic basis of animal domestication remains poorly  
5  
6  
7 31 understood, and systems with substantial phenotypic differences between wild  
8  
9  
10 32 and domestic populations are useful for elucidating the genetic basis of  
11  
12  
13 33 adaptation to new environments as well as the genetic basis of rapid phenotypic  
14  
15  
16 34 change. Here, we sequenced the whole genome of 78 individual ducks, from  
17  
18  
19 35 two wild and seven domesticated populations, with an average sequencing  
20  
21 36 depth of 6.42X per individual.

22  
23  
24 37 **Results:** Our population and demographic analyses indicate a complex history  
25  
26  
27 38 of domestication, with early selection for separate meat and egg lineages.  
28  
29  
30 39 Genomic comparison of wild to domesticated populations suggest that genes  
31  
32  
33 40 affecting brain and neuronal development have undergone strong positive  
34  
35  
36 41 selection during domestication. Our  $F_{ST}$  analysis also indicates that the duck  
37  
38  
39 42 white plumage is the result of selection at the *melanogenesis associated*  
40  
41  
42 43 *transcription factor* locus.

43  
44 44 **Conclusions:** Our results advance the understanding of animal domestication  
45  
46  
47 45 and selection for complex phenotypic traits.

48  
49 46 **Keywords:** duck, domestication, intensive selection, neuronal development,  
50  
51  
52 47 energy metabolism, plumage colouration.

53  
54 48

55  
56  
57 49

58  
59  
60 50

1  
2  
3  
4  
5  
6  
7  
8  
9  
10  
11  
12  
13  
14  
15  
16  
17  
18  
19  
20  
21  
22  
23  
24  
25  
26  
27  
28  
29  
30  
31  
32  
33  
34  
35  
36  
37  
38  
39  
40  
41  
42  
43  
44  
45  
46  
47  
48  
49  
50  
51  
52  
53  
54  
55  
56  
57  
58  
59  
60  
61  
62  
63  
64  
65



---

## 51 Background

52 Animal domestication was one of the major contributory factors to the  
53 agricultural revolution during the Neolithic period, which resulted in a shift in  
54 human lifestyle from hunting to farming [1]. Compared with their wild  
55 progenitors, domesticated animals showed notable changes in behavior,  
56 morphology, physiology, and reproduction [2]. Detecting domestication-  
57 mediated selective signatures is important for understanding the genetic basis  
58 of both adaptation to new environments and rapid phenotype change [3, 4]. In  
59 recent years, to characterize signatures of domestication, whole genome  
60 resequencing studies have been performed on a wide range of agricultural  
61 animals, including pig [5], sheep [6], rabbit [7] and chicken [8, 9].

62 Mallards (*Anas platyrhynchos*) are the world's most widely distributed and  
63 agriculturally important waterfowl species, and are of particular economic  
64 importance in Asia [10]. Southeast Asia, particularly southern China, is the  
65 major center of duck domestication, with records indicating duck farming in the  
66 region dating at least 2,000 years [11, 12], particularly in wet environments [13]  
67 associated with rice crops [14]. In the absence of archaeological evidence, the  
68 exact timing of domestication and the time of meat and egg type ducks split  
69 remains unknown, with the first written records indicating domestic ducks in  
70 central China shortly after 500 BC [15].

71 It is clear that the domesticated duck originated from mallards [16], and  
72 domestic ducks can be classified as those produced primarily for meat (similar

---

1 73 to chicken broilers) or eggs (similar to chicken layer lines). Together with the  
2  
3 74 timing of duck domestication, the relative separation of duck meat and egg lines  
4  
5  
6 75 is also unknown. It is unclear whether ducks were domesticated once, and  
7  
8  
9 76 subsequently selected for divergent meat and egg production traits, or whether  
10  
11 77 meat and egg populations were derived independently in two domestication  
12  
13 78 events from wild mallards.

14  
15  
16  
17 79 Moreover, domesticated mallards show many important behavioral [17]  
18  
19 80 and morphological [18-20] differences from their wild ancestors, particularly  
20  
21 81 related to plumage and neuroanatomy. However, the genetic basis of these  
22  
23 82 phenotypic differences are still poorly understood.  
24  
25  
26  
27

## 28 29 83 **Data Description**

30  
31  
32  
33 84 In order to determine the timing of duck domestication in China, as well as  
34  
35 85 identify the genomic regions under selection during domestication, we  
36  
37 86 performed whole genome resequencing from 78 individuals belonging to seven  
38  
39 87 different duck breeds (three for meat breeds, three for egg breeds, and one  
40  
41 88 dual-purpose breed) and two geographically distinct wild populations. Using the  
42  
43 89 large number of single nucleotide polymorphisms (SNPs) as well as small  
44  
45 90 insertions and deletions (INDELs), we tested for population structure between  
46  
47 91 domesticated and wild populations, as well as assessed the genome for  
48  
49 92 signatures of selection associated with domestication. We tested alternative  
50  
51 93 demographic scenarios with the pairwise sequential Markovian coalescent  
52  
53  
54  
55  
56  
57  
58  
59  
60  
61  
62  
63  
64  
65

94 method combined with the diffusion approximation method.

## 95 Analyses

### 96 Genetic variation

97 We individually sequenced 22 wild and 56 domestic ducks, from two wild  
98 populations and seven domestic breeds (three meat breeds, three egg breeds  
99 and one dual-purpose breed), from across China (Fig. 1A) to an average of  
100 6.42X coverage per individual (a total of 613.37 of Gb high quality paired end  
101 sequence data) after filtering and quality control, resulting in total 535 billion  
102 mappable reads across 78 ducks (Supplemental Table S1).

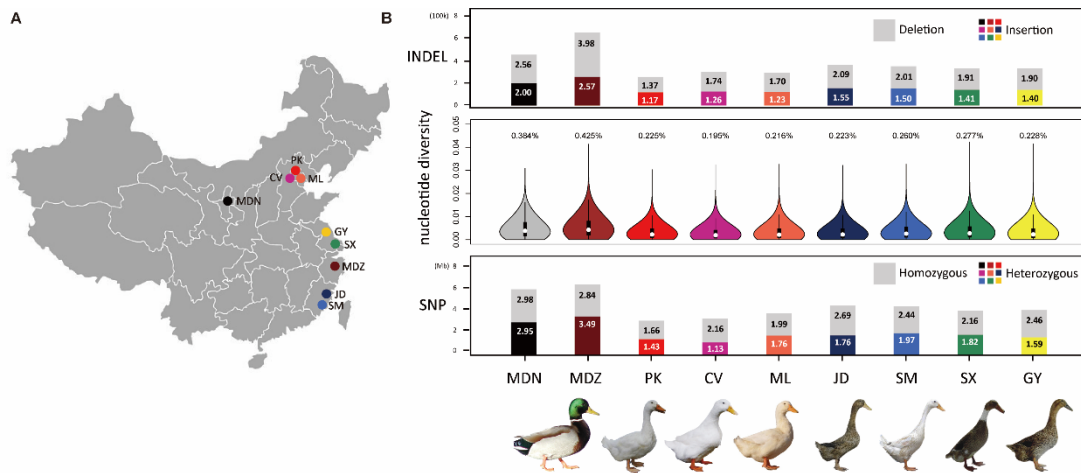

103

104 **Figure. 1 Experimental design and variants statistics**

105 **(A)** Sampling sites in this study. A total of 78 ducks from two wild populations (Mallard Ningxia  
106 (MDN) n=8; Mallard Zhejiang (MDZ) n=14), three meat breeds (Pekin (PK) n=8; Cherry Valley  
107 (CV) n=8; Maple Leaf (ML) n=8), three egg breeds (Jin Ding (JD) n=8; Shan Ma (SM) n=8;  
108 Shao Xing (SX) n=8), and one dual purpose breed (Gao You (GY) n=8) were selected.

109 **(B)** Genomic variation of nine populations. Mean number of SNPs, heterozygous and

1  
2  
3  
4  
5  
6  
7  
8  
9  
10  
11  
12  
13  
14  
15  
16  
17  
18  
19  
20  
21  
22  
23  
24  
25  
26  
27  
28  
29  
30  
31  
32  
33  
34  
35  
36  
37  
38  
39  
40  
41  
42  
43  
44  
45  
46  
47  
48  
49  
50  
51  
52  
53  
54  
55  
56  
57  
58  
59  
60  
61  
62  
63  
64  
65

---

1 110 homozygous SNP ratio in the nine populations are shown at the bottom. Nucleotide diversity  
2  
3 111 ratios of the nine populations are shown at the middle. The nucleotide diversity ratios in wild  
4  
5  
6 112 mallards are dramatically higher than ratios in domesticated ducks. Number of insertions and  
7  
8  
9 113 deletions in the nine populations are shown at the top. The number of deletions was higher than  
10  
11  
12 114 the number of insertions in all nine populations.  
13

14 115

16  
17 116       Across samples, we identified a total of 39.2 million (M) variants, consisting  
18  
19  
20 117 of 36.1 M SNPs (average per sample = 4.5 M SNPs; range = 2.34 - 9.52 M  
21  
22 118 SNPs) and 3.1 M INDELs (average per sample = 0.4 M INDELs; range = 0.21  
23  
24  
25 119 - 0.89 M INDELs) (Fig. 1B, Supplemental Figs. S1 - S2, Supplemental Table  
26  
27  
28 120 S2). Single base-pair INDELs were the most common, accounting for 38.63%  
29  
30  
31 121 of all detected INDELs (Supplemental Table S3). Our dataset covers 96.2% of  
32  
33  
34 122 the duck dbSNP database deposited in the Genome Variation Map (GVM)  
35  
36 123 (<http://bigd.big.ac.cn/gvm/>). In general, domesticated populations showed  
37  
38  
39 124 lower number of SNPs (t test,  $p = 3.13 \times 10^{-12}$ ) and nucleotide diversity (t test,  
40  
41  
42 125  $p = 2.20 \times 10^{-16}$ ) as compared to wild mallards (Fig. 1B). Moreover,  
43  
44  
45 126 homozygosity in domesticated ducks was significantly higher than ratios in wild  
46  
47  
48 127 mallards (t test,  $p = 1.35 \times 10^{-10}$ ) consistent with the larger panmictic wild  
49  
50  
51 128 population or with the higher artificial selection and inbreeding within  
52  
53 129 domesticated stocks.  
54  
55  
56  
57  
58  
59  
60  
61  
62  
63  
64  
65

---

130 Population structure and domestication

131 Phylogenetic relationships, based on a neighbor-joining (NJ) of pairwise  
132 genetic distances of whole genome SNPs (Fig. 2A) and Principal Component  
133 Analysis (PCA, Fig. 2B) revealed strong clustering into three distinct genetic  
134 groups. In general, we observed separate clusters corresponding to wild ducks  
135 (MDN and MDZ), ducks domesticated for meat production (PK, CV, and ML),  
136 and ducks domesticated for egg production (JD, SM, and SX). The dual-  
137 purpose domesticate (GY) clustered with ducks domesticated for egg  
138 production (Fig. 2B-C).

139 We further performed population structure analysis using FRAPPE [21],  
140 which estimates individual ancestry and admixture proportions assuming K  
141 ancestral populations (Fig. 2C). With  $K = 2$ , a clear division was found between  
142 wild type ducks (MDN and MDZ) and domesticated ducks (PK, CV, ML, JD, SM,  
143 SX, and GY). With  $K = 3$ , a clear division was found between meat type ducks  
144 (PK, CV, and ML) and egg type ducks mixed with dual-purpose type ducks (JD,  
145 SM, SX, and GY).

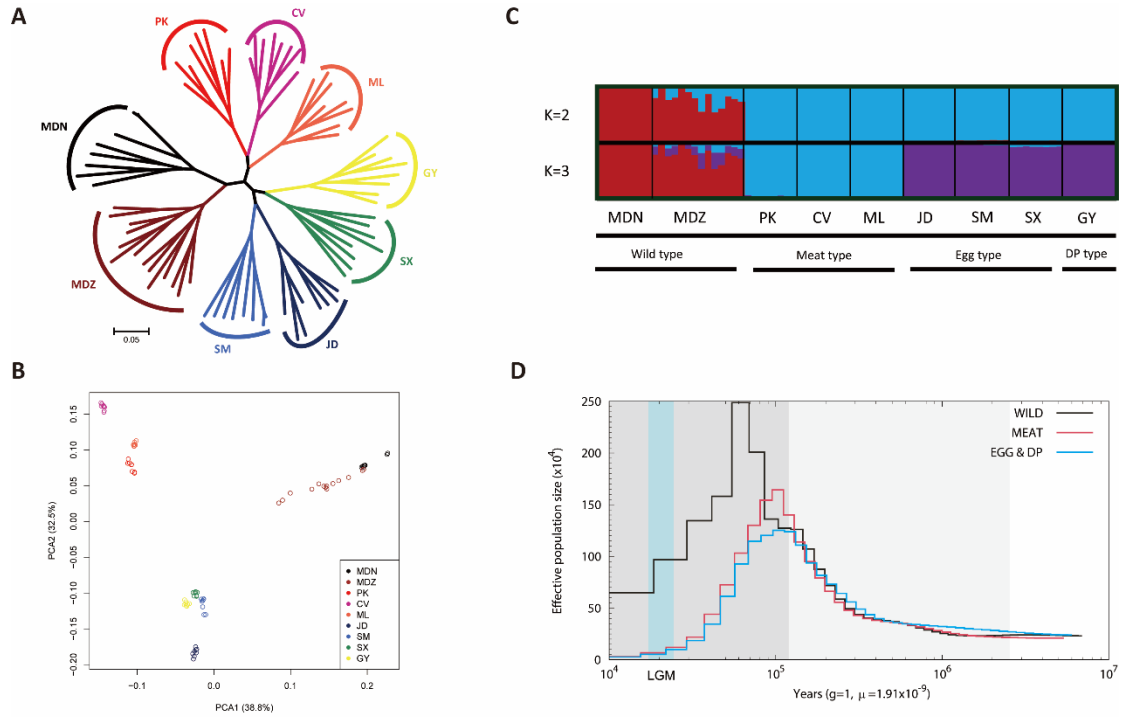

146

147 **Figure. 2 Population genetic structure and demographic history of nine duck**  
 148 **populations**

149 **(A)** Neighbor-joining phylogenetic tree of nine duck populations. The scale bar is  
 150 proportional to genetic differentiation ( $p$  distance).

151 **(B)** PCA plot of duck populations. Eigenvector 1 and 2 explained 38.8% and 32.5% of the  
 152 observed variance, respectively.

153 **(C)** Population genetic structure of 78 ducks. The length of each colored segment  
 154 represents the proportion of the individual genome inferred from ancestral populations ( $K = 2$ -  
 155 3). The population names and production type are at the bottom. DP type means dual-purpose  
 156 type.

157 **(D)** Demographic history of duck populations. Examples of PSMC estimate changes in the  
 158 effective population size over time, representing variation in inferred  $N_e$  dynamics. The lines  
 159 represent inferred population sizes and the gray shaded areas indicate the Pleistocene period,

---

1 160 with Last Glacial Period (LGP) shown in darker gray, and Last Glacial Maximum (LGM) shown  
2  
3 161 in light blue areas.  
4

5  
6 162 Next, we explored the demographic history of our samples to differentiate  
7  
8 163 whether domestication of meat and egg producing ducks was the result of one  
9  
10 164 or multiple events. First, we estimated changes in effective population size ( $N_e$ )  
11  
12 165 in our three genetic clusters in a pairwise sequentially Markovian coalescent  
13  
14 166 (PSMC) framework [22]. The meat type ducks (PK, CV, and ML) showed  
15  
16 167 concordant demographic trajectories with egg and mixture dual-purpose type  
17  
18 168 populations (JD, SM, SX, and GY) with one apparent expansion around the  
19  
20 169 Penultimate Glaciation Period (PGP, 0.30-0.13 Mya) [4, 23] and Last Glacial  
21  
22 170 Period (LGP, 110-12 kya) [24, 25], followed by a subsequent contraction (Fig.  
23  
24 171 2D). Next, we tested multiple demographic scenarios related to domestication  
25  
26 172 using a diffusion approximation method for the allele frequency spectrum ( $\partial a \partial i$ )  
27  
28 173 (Supplemental Fig. S3 and S4). Among the four isolation models tested (models  
29  
30 174 1 - 4), the model of a single domestication with subsequent divergence of the  
31  
32 175 domesticated breeds (Model 2) was both consistent with our population  
33  
34 176 structure results (Fig. 2) and had the lowest Akaike Information Criteria (AIC)  
35  
36 177 value, indicating a better overall fit to the data (log-likelihood = -33,388.43; AIC  
37  
38 178 = 66,788) (Supplemental Fig. S3).  
39  
40  
41  
42  
43  
44  
45  
46  
47  
48  
49  
50  
51  
52

53 179 Demographic parameters estimated from the single domestication model  
54  
55 180 (Model 2) indicated that domestication occurred 2,228, with 95% confidence  
56  
57 181 intervals (CI)  $\pm$  441 years ago, followed by a rapid subsequent divergence of  
58  
59  
60  
61  
62  
63  
64  
65



182 the meat breed from the egg/dual purpose breeds roughly 100 years after the  
 183 initial domestication event (Table 1). Our results suggest that following an initial  
 184 bottleneck associated with domestication, with an estimated  $N_e$  of 320 (95% CI  
 185  $\pm 3$ ) individuals for the ancestral domesticated population, the population has  
 186 expanded to the current  $N_e$  of 5,597 (95% CI  $\pm 1,195$ ) and 12,988 (95% CI  $\pm$   
 187 2,877) in the meat type and egg/dual purpose breeds respectively.  $N_e$  estimates  
 188 for domesticated breeds are lower than  $N_e$  of 88,842 (95% CI  $\pm 18,065$ ) in wild  
 189 mallards, consistent with the large panmictic wild population.

190

191 **Table 1.** Maximum likelihood population demographic parameters. Best fit  
 192 parameter estimates for the model of a single domestication event followed by  
 193 divergence of the domesticated breeds, including changes in population size.  
 194 95% confidence intervals were obtained from 100 bootstrap data sets. Time  
 195 estimates are given in years and migration are in units of number of migrants  
 196 per generation.

197

| Parameter                                       | ML estimate | 95% CI            |
|-------------------------------------------------|-------------|-------------------|
| $N_e$ of ancestral population after size change | 663,439     | 644,726 – 682,152 |
| $N_e$ of the wild population                    | 88,842      | 70,778 – 106,907  |
| $N_e$ of the ancestral domesticated population  | 320         | 316 – 323         |
| $N_e$ of the meat breed                         | 5,597       | 4,402 – 6,792     |
| $N_e$ of the egg/dual purpose                   | 12,988      | 10,111 – 15,865   |
| Time of size change in the ancestral population | 249,944     | 227,912 – 267,518 |
| Time of domestication                           | 2,228       | 1,787 – 2,669     |
| Time of breed divergence                        | 2,126       | 1,686 – 2,567     |
| Migration $_{wild \leftarrow meat}$             | 1.12        | 1.00 – 1.24       |
| Migration $_{wild \leftarrow egg/dp}$           | 3.92        | 3.11 – 4.73       |

198

199 Gene flow estimates were relatively high, with 1 and 4 migrants per  
 200 generation from the meat and egg/dual purpose breeds, respectively, into the  
 201 wild population. Our results suggested duck domestication was a recent single

---

1 202 domestication event followed by rapid subsequent selection for separate meat  
2  
3 203 and egg/dual purpose breeds.  
4

5  
6 204 Selection for plumage color  
7

8  
9 205 Derived traits in domesticated animals tend to evolve in a predictable order,  
10  
11 206 with color variation appearing in the earliest stages of domestication, followed  
12  
13 207 by coat or plumage and structural (skeletal and soft tissue) variation, and finally  
14  
15 208 behavioral differences [26, 27]. One of the simplest and most visible derived  
16  
17 209 traits of ducks is white plumage color. In order to detect the signature of  
18  
19 210 selection associated with white feathers, we searched the duck genome for  
20  
21 211 regions with high  $F_{ST}$  between the populations of white feather (PK, CV, and  
22  
23 212 ML) and non-white feather (MDN, MDZ, JD, SX, and GY) birds based on sliding  
24  
25 213 10kb windows. We identified a region of high differentiation between white  
26  
27 214 plumage and non-white plumage ducks overlapping the *melanogenesis*  
28  
29 215 *associated transcription factor* (*MITF*;  $F_{ST}=0.69$ ) (Fig. 3A). In the intronic region  
30  
31 216 of *MITF*, we identified 13 homozygous SNPs and 2 homozygous INDELS  
32  
33 217 present in all white plumage breeds (n=24) and absent in all non-white plumage  
34  
35 218 breeds (n=46) (Fig. 3B). These mutations were completely associated with the  
36  
37 219 white plumage phenotype, suggesting a causative mutation at the *MITF* locus.  
38  
39 220 Moreover, to validate the reliability of variants detected in *MITF* gene, we  
40  
41 221 amplified the first three SNPs (SNP817793, SNP817818, and SNP818004) and  
42  
43 222 all INDELS by diagnostic PCR combined with Sanger sequencing in the 78  
44  
45 223 white and non-white plumage ducks. The results show that the three SNPs and  
46  
47  
48  
49  
50  
51  
52  
53  
54  
55  
56  
57  
58  
59  
60  
61  
62  
63  
64  
65

224 INDEL817958 completely match our NGS analysis (supplemental Fig. S5), For  
 225 INDEL818495, we were unable to design a suitable PCR primer to amplify this  
 226 region.

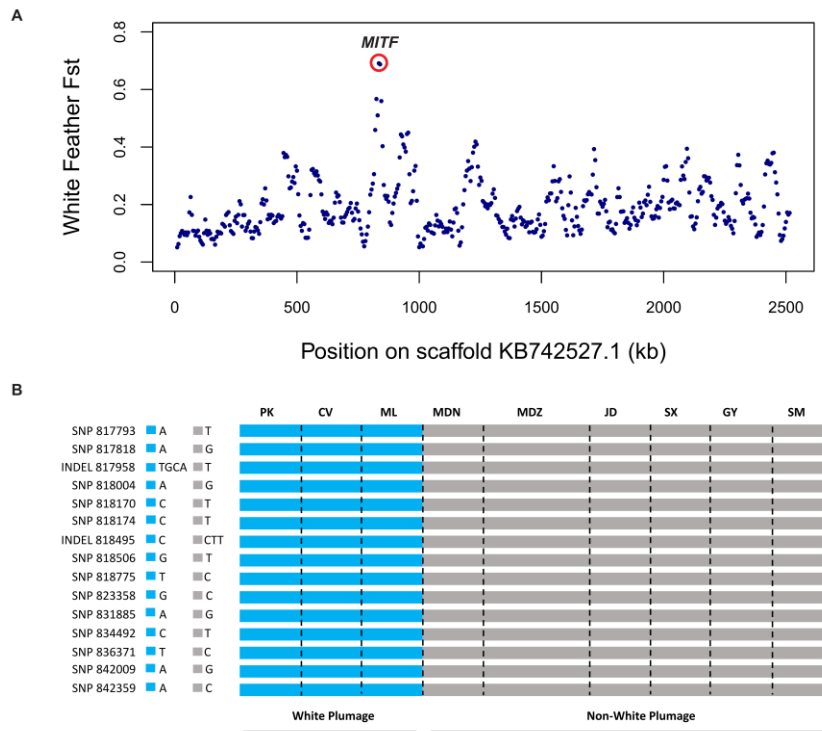

227  
 228 **Figure. 3 MITF shows different genetic signature between white plumage and non-white**  
 229 **plumage ducks.**

230 **(A)** F<sub>ST</sub> plot around the MITF locus. The F<sub>ST</sub> value of MITF is highest for scaffold  
 231 KB742527.1, circled in red. Each plot represent a 10 kb windows.

232 **(B)** 13 homozygous SNPs and 2 homozygous INDELS were identified in white plumage  
 233 ducks and absent in non-white plumage ducks. SNPs and INDELS were named  
 234 according to their position on scaffold.

### 235 Selection for other domestication traits

236 In order to detect the signature of selection for other traits associated with

237 duck domestication, we scanned the duck genome for regions with a high  
 238 coefficient of nucleotide differentiation ( $F_{ST}$ ) among the populations of wild  
 239 (MDN and MDZ) and domesticated (PK, CV, ML, JD, SM, SX, and GY) ducks  
 240 based on 10kb sliding windows, as well as global  $F_{ST}$  between each population  
 241 (Supplemental Tables S4). Owing to the complex and partly unresolved  
 242 demographic history of these populations, it is difficult to define a strict threshold  
 243 that distinguishes true sweeps from regions of homozygosity caused by drift.  
 244 We therefore also calculated the pairwise diversity ratio ( $\theta_{\pi}$ (wild/domesticated)).  
 245 We identified 292 genes in the top 5% of both  $F_{ST}$  and  $\theta_{\pi}$  scores, putatively  
 246 under positive selection during domestication (Fig. 4A, Supplemental Tables  
 247 S5).

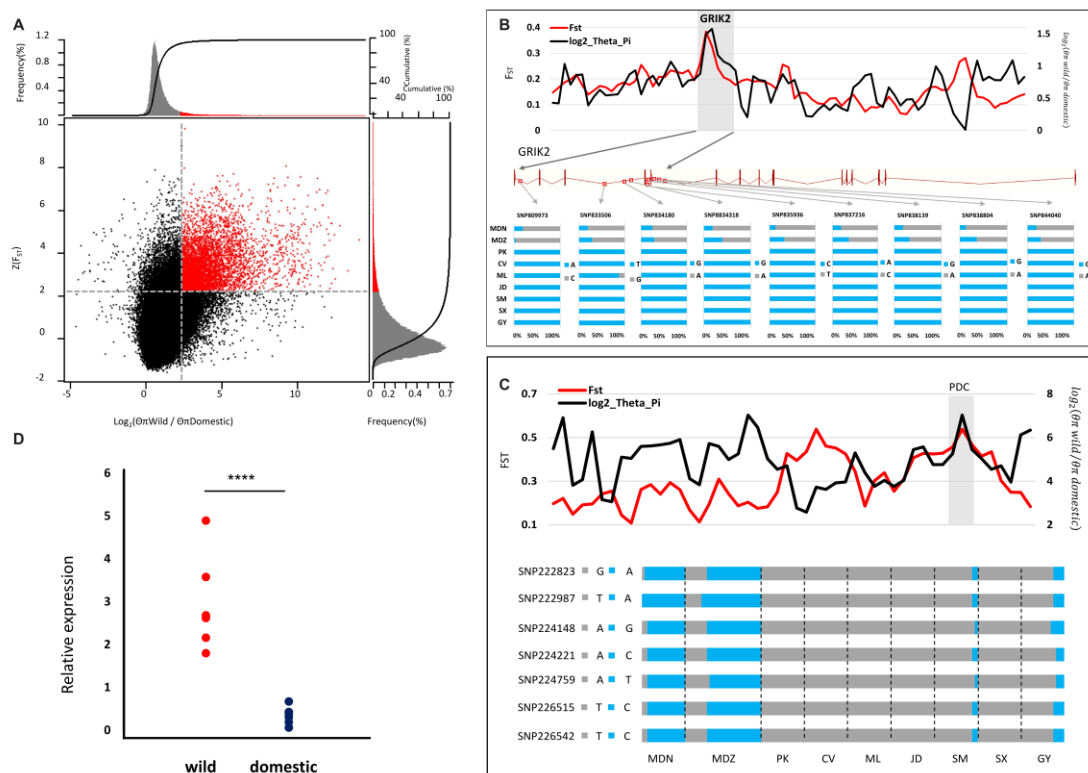

248  
 249 **Figure. 4 Genomic regions with strong selective sweep signals in wild**  
 250 **population ducks and domesticated population ducks.**

---

1 251 (A) Distribution of  $\theta\pi$  ratios ( $\theta\pi_{(wild/domesticated)}$ ) and  $Z(F_{ST})$  values, which are  
2  
3 252 calculated by 10kb windows with 5kb steps. Only scaffolds > 10kb were used for our calculation,  
4  
5  
6 253 as  $F_{ST}$  result calculated on small scaffold are unlikely to be accurate. Red data points located  
7  
8  
9 254 to the top-right regions correspond to the 5% right tails of empirical  $\log_2(\theta\pi_{wild}/\theta\pi_{domestic})$   
10  
11 255 ratio distribution and the top 5% empirical  $Z(F_{ST})$  distribution are genomic regions under  
12  
13  
14 256 selection during duck domestication. The two horizontal and vertical gray lines represented the  
15  
16  
17 257 top 5% value of  $Z(F_{ST})$  (2.216) and  $\log_2(\theta\pi_{wild}/\theta\pi_{domestic})$  (2.375), respectively.

18  
19  
20 258 (B)  $\log_2(\theta\pi)$  ratios and  $F_{ST}$  values around the *GRIK2* locus and allele frequencies of  
21  
22  
23 259 nine SNPs within the *GRIK2* gene across nine duck populations. The black and red lines  
24  
25 260 represent  $\log_2(\theta\pi_{wild}/\theta\pi_{domestic})$  ratios and  $F_{ST}$  values, respectively. The gray bar  
26  
27  
28 261 showed the region of under strong selection in *GRIK2* gene. The nine red rectangular frame  
29  
30  
31 262 corresponding to the locus on gene of nine SNPs. The SNPs were named according to their  
32  
33  
34 263 position on scaffold.

35  
36 264 (C) The *PDC* gene showed different genetic signature in domesticated and wild duck.  
37  
38  
39 265  $\log_2(\theta\pi)$  ratios and  $F_{ST}$  values around the *PDC* locus. The *PDC* gene region is shown in gray.  
40  
41  
42 266 Allele frequencies of seven SNPs within the *PDC* gene across nine duck populations. The SNPs  
43  
44  
45 267 are named according to their scaffold position.

46  
47 268 (D) The *PDC* gene expression level differs between domesticated and wild duck. *PDC*  
48  
49  
50 269 mRNA expression levels in brain of wild (MDN, n=3; MDZ, n=4) and domesticated (PK, n=1;  
51  
52  
53 270 CV, n=1; ML, n=1; JD, n=1; SM, n=1; SX, n=1; GY, n=1) ducks. \*\*\*\* $P$  value from  $t$ -test  
54  
55  
56 271 ( $P < 0.0001$ ).

57  
58 272 All 292 genes located in the top 5%  $F_{ST}$  regions were used for the GO  
59  
60  
61  
62  
63  
64  
65

---

1 273 analysis, resulting in a total of 57 GO enrichment terms (supplementary table  
2  
3 274 S6). Because domesticated ducks are known to differ from wild ducks in body  
4  
5  
6 275 size, body fat percentage, behavior, egg productivity, growth speed, and flight  
7  
8  
9 276 capability, we focused our analysis on GO annotations of neural related  
10  
11 277 processes, lipid metabolism and energy metabolism, reproduction, and skeletal  
12  
13  
14 278 muscle contraction for our 292 putative positively selection genes. In this  
15  
16  
17 279 reduced data set, the neuro-synapse-axon and lipid-energy metabolism  
18  
19  
20 280 pathways were over-represented ([Supplemental Table S7](#)) in our list of genes  
21  
22  
23 281 under selection.

25 282 From the highlighted GO terms, a total of 25 neuro-synapse-axon genes  
26  
27  
28 283 were identified as being under positive selection, with six (*ADGRB3*, *EFNA5*,  
29  
30  
31 284 *GRIN3A*, *GRIK2*, *SYNGAP1*, and *HOMER1*) in the top 1% of  $F_{ST}$  and  $\theta_{\pi}$   
32  
33  
34 285 ([Supplemental Tables S8](#)). In particular, *GRIK2* (glutamate receptor, ionotropic  
35  
36  
37 286 kainate 2) and *GRIN3A* (glutamate receptor, subunit 3A) both showed high  $F_{ST}$   
38  
39  
40 287 and  $\theta_{\pi}$  value compared to neighboring regions, suggesting functional  
41  
42 288 importance ([Fig. 3B](#), [Supplemental Table S5](#), [S8](#)).

45 289 Beyond the neuronal-synapse-axon genes, 115 genes were identified in  
46  
47  
48 290 the four lipid and energy related pathways with high  $F_{ST}$  and  $\theta_{\pi}$  values,  
49  
50  
51 291 particularly related to fatty acid metabolism. Among these genes, 37 genes  
52  
53  
54 292 were found with both parameters yielding top 1% ranked values ([Supplemental](#)  
55  
56 293 [Tables S8](#)), such as phosphatidylinositol 3-kinase catalytic subunit type 3  
57  
58  
59 294 (*PIK3C3*), and patatin like phospholipase domain containing 8 (*PNPLA8*).

---

1 295 To infer whether selection extends beyond allelic variation and also affects  
2  
3 296 gene expression, we compared individual gene expression in the brain, liver,  
4  
5  
6 297 and in breast muscle between seven wild mallards and seven domesticated  
7  
8  
9 298 ducks in natural states with RNA-seq ([Supplemental Tables S9](#)). We detected  
10  
11 299 three genes (*PDC*, *MLPH*, and *NID2*) in the brain, two genes (*MAPK12* and  
12  
13 300 *BST1*) in the liver, and no genes in breast muscle with significantly different  
14  
15  
16 301 expression between wild and domesticated ducks. Of the five differentially  
17  
18  
19 302 expressed genes, *PDC* was the only gene which also showed evidence of a  
20  
21  
22 303 selective sweep at the genomic level ([Supplemental Tables S5](#), [Fig. 3C - D](#)).  
23  
24  
25 304 The results suggest that the *PDC* gene is of substantial functional importance  
26  
27  
28 305 in phenotypic differentiation among wild and domestic ducks.  
29  
30

## 31 **Discussion**

32  
33  
34  
35

36 307 Domesticated animals have contributed greatly to human society and  
37  
38 308 human population growth by providing a stable source of animal protein, fat,  
39  
40  
41 309 and accessory products such as leather and feathers (including down). To  
42  
43  
44 310 illuminate the genetic trajectories of duck domestication, we performed whole-  
45  
46  
47 311 genome sequencing of 78 ducks including seven domesticate breeds and two  
48  
49  
50 312 wild populations. This is the first study to characterize the genetic architecture,  
51  
52  
53 313 phylogenetic relationships and domestication history of domesticated ducks  
54  
55 314 and wild mallards.  
56

57  
58 315 Using this powerful dataset and a suite of cutting-edge population genomic  
59  
60  
61  
62  
63  
64  
65



---

1 316 and functional genetic analyses, we observed higher mean variant numbers  
2  
3 317 and nucleotide diversity for the wild mallard populations compared to the  
4  
5  
6 318 domestics, consistent with both a greater panmictic mallard population as well  
7  
8  
9 319 as recent sweeps associated with domestication.

## 10 11 320 Population structure and domestication

12  
13  
14 321 We observed a large expansion of the duck population at the interglacial  
15  
16  
17 322 period, which could be the result of beneficial climatic changes, including rising  
18  
19  
20 323 temperatures and sea levels. In contrast, the glacial maximum coincided with a  
21  
22  
23 324 reduction in population size, consistent with harsher conditions and limited  
24  
25  
26 325 access to arctic breeding grounds [4, 28-30]. The demographic pattern we  
27  
28  
29 326 observe in wild ducks is similar to that observed in wild boars [5], wild yaks [31],  
30  
31  
32 327 and wild horses [32]. However, it is worth noting that although PSMC is a  
33  
34  
35 328 powerful method to infer changes in  $N_e$  over time, it is also sensitive to  
36  
37  
38 329 deviations from a neutral model. The effects of genetic drift and/or selection  
39  
40  
41 330 could lead to time-dependent estimates of mutation rate, and bias our estimates  
42  
43  
44 331 of population expansion [25].

45  
46  
47 332 We observed three genetic clusters, with wild mallard, meat breeds, and  
48  
49  
50 333 egg/dual purpose breeds each representing unique groups. These results  
51  
52  
53 334 suggest either a single domestication event followed by subsequent breed-  
54  
55  
56 335 specific selection, or two separate domestication events. In order to distinguish  
57  
58  
59 336 alternative models of domestication, we modeled population demographics and  
60  
61  
62 337 found strong support for a single domestication event roughly 2,200 years ago,  
63  
64  
65

---

1 338 with the rapid subsequent selection for separate meat and egg/dual purpose  
2  
3 339 breeds roughly 100 generations later. Difficulty in differentiating between very  
4  
5  
6 340 recent divergence and high migration rates in the frequency spectrum  
7  
8  
9 341 prevented convergence between independent runs when trying to fit other  
10  
11 342 migration parameters to our model. We note that the evolutionary history of wild  
12  
13 343 mallards and domesticated duck breeds is likely to be more complex than the  
14  
15  
16 344 simple demographic scenarios modelled here, and further studies may be  
17  
18  
19 345 needed to fully capture the evolutionary dynamics of duck domestication. Given  
20  
21  
22 346 the recent origin of wild ducks, as well as the high levels of diversity we observe  
23  
24  
25 347 in the wild and domestic duck genomes, it is not possible to differentiate recent  
26  
27  
28 348 admixture from incomplete lineage sorting with our current data. This issue has  
29  
30  
31 349 important conservation implications, and represents an interesting area for  
32  
33  
34 350 future study. Nevertheless, the time estimates obtained with our model are  
35  
36  
37 351 compatible with previous written records from 500 BC [15].

### 39 352 Selection for white plumage

41  
42 353 Plumage color is an important domestication trait, and we compared  
43  
44 354 breeds with white plumage to those with colored plumage. We identified high  
45  
46  
47 355 levels of divergence in the intronic region of the *MITF* gene, an important  
48  
49  
50 356 developmental locus with a complex regulation implicated in pigmentation and  
51  
52  
53 357 melanocyte development in several vertebrate species [33-35], including  
54  
55  
56 358 Japanese quail [36], dog [37], and duck [38, 39].  
57  
58  
59  
60  
61  
62  
63  
64  
65

---

1 359 Selection for other domestication traits

2  
3  
4 360 In order to identify those genomic regions which have been the target of  
5  
6  
7 361 selection during domestication, we used estimates of diversity between wild  
8  
9  
10 362 and domestic samples, retaining those 292 genes in the top 5% of both  $F_{ST}$  and  
11  
12  
13 363  $\theta_{\pi}$  values for further analysis. These genes were over-represented for both  
14  
15  
16 364 neural developmental and lipid metabolism, suggesting that these  
17  
18  
19 365 functionalities were under strong selection during domestication. Two loci,  
20  
21 366 *GRIK2* and *GRIN3A*, showed particularly strong signs of selective sweeps  
22  
23  
24 367 presumably associated with domestication. *GRIK2* encodes a subunit of a  
25  
26  
27 368 glutamate receptor that has a role in synaptic plasticity and is important for  
28  
29  
30 369 learning and memory. *GRIN3A* encodes a subunit of the N-methyl-D-aspartate  
31  
32  
33 370 (NMDAR) receptors, which is expressed abundantly in the human cerebral  
34  
35 371 cortex [40] and is involved in the development of synaptic elements

36  
37 372 We also identified five genes with significantly different expression in the  
38  
39  
40 373 brain and liver of domesticated ducks compared to their wild ancestor. One of  
41  
42  
43 374 these, *PDC*, also showed evidence of selective sweeps at the genomic level.  
44  
45  
46 375 *PDC* encodes phosducin, a photoreceptor-specific protein highly expressed in  
47  
48  
49 376 retina and pineal gland [41], as well as the brain [42].

50  
51 377 Our results suggest that *PDC*, *GRIK2* and *GRIN3A* may have played a  
52  
53  
54 378 crucial role in duck domestication by altering functional regulation of the  
55  
56  
57 379 developing brain and nervous system. This finding is consistent with theories  
58  
59  
60 380 that behavioral traits are the most critical in the initial steps of animal

1  
2  
3  
4  
5  
6  
7  
8  
9  
10  
11  
12  
13  
14  
15  
16  
17  
18  
19  
20  
21  
22  
23  
24  
25  
26  
27  
28  
29  
30  
31  
32  
33  
34  
35  
36  
37  
38  
39  
40  
41  
42  
43  
44  
45  
46  
47  
48  
49  
50  
51  
52  
53  
54  
55  
56  
57  
58  
59  
60  
61  
62  
63  
64  
65

---

1 381 domestication, allowing animals to tolerate humans and captivity [43, 44].  
2  
3 382 Indeed, compared to wild mallards, domestic ducks are more docile, less  
4  
5  
6 383 vigilant, and show important differences in brain morphology [17, 18].  
7  
8  
9 384 Interestingly, differences between wild and domesticated animals in brain and  
10  
11 385 nervous system functions due to directional selection were also observed in  
12  
13  
14 386 domestication studies of rabbits [7], dogs [45], and chickens [8]. In particular,  
15  
16  
17 387 *GRIK2* was also found to play a crucial role during rabbit domestication [7].  
18

19  
20 388 Besides brain and nervous system related genes, we also identified  
21  
22 389 several genes that play an important function in lipid and energy metabolism.  
23  
24  
25 390 For example, *PIK3C3* plays an important role in ATP binding but also regulates  
26  
27  
28 391 brain development and axons of cortical neurons [46-50]. *PNPLA8* is involved  
29  
30  
31 392 in facilitating lipid storage in adipocyte tissue energy mobilization and maintains  
32  
33  
34 393 mitochondrial integrity [51, 52], as well as plays a role in lipid metabolism  
35  
36  
37 394 associated with neurodegenerative diseases [53-55]. *PRKAR2B* is associated  
38  
39  
40 395 with body weight regulation, hyperphagia, and other energy metabolism [56,  
41  
42 396 57].  
43

44  
45 397 Taken together, our results show that duck domestication was a relatively  
46  
47  
48 398 recent and complex process, and the genetic basis of domestication traits show  
49  
50  
51 399 many striking overlaps with other vertebrate domestication events. And, the  
52  
53  
54 400 whole genome resequencing data and SNP and INDEL variant datasets are  
55  
56  
57 401 valuable resources for researchers studying evolution, domestication or trait  
58  
59  
60 402 discovery, and for breeders of *Anas platyrhynchos*. Furthermore, the data  
61  
62  
63  
64  
65

---

1 403 represent a foundation for development of new, ultrahigh density variant  
2  
3 404 screening arrays for duck population level trait analysis and genomic selection.  
4  
5

## 6 405 **Methods**

### 7 406 Ethics statement

8  
9  
10  
11  
12  
13  
14  
15 407 The entire procedure was carried out in strict accordance with the protocol  
16  
17  
18 408 approved by the Animal Welfare Committee of China Agricultural University  
19  
20  
21 409 (Permit Number: XK622).  
22  
23

### 24 410 Sample selection

25  
26  
27  
28 411 78 ducks were chosen for sequencing, seven different populations of  
29  
30  
31 412 domesticated ducks and two population of mallards from different geographic  
32  
33  
34 413 regions. The domesticated ducks include three meat type populations *i.e.*,  
35  
36  
37 414 Pekin duck (PK; n=8); Cherry Valley duck (CV; n=8); Maple Leaf duck (ML; n=8),  
38  
39  
40 415 three egg type populations *i.e.*, Jin Ding duck (JD; n=8); Shao Xing duck (SX;  
41  
42  
43 416 n=8); Shan Ma duck (SM; n=8), one egg and meat dual-purpose type (DP type)  
44  
45  
46 417 population *i.e.*, Gao You duck (GY; n=8), and two wild populations come from  
47  
48  
49 418 two different provinces in China with separated by nearly 2,000 km distance *i.e.*,  
50  
51  
52 419 Mallard from Ningxia province (MDN; n=8); Mallard form Zhejiang province  
53  
54  
55 420 (MDZ; n=14). The classification of production types follow the description of  
56  
57  
58 421 Animal Genetic Resources in China Poultry [58]. PK, CV, and ML ducks  
59  
60  
61 422 originated from Beijing; JD and SM ducks originated from Fujian province while  
62  
63  
64  
65

---

1 423 SX and GY ducks originated from Jiangsu province. Whole blood samples were  
2  
3 424 collected from brachial veins of ducks by standard venipuncture.  
4  
5

6 425 In addition, 14 male ducks (MDNM, n=3; MDZM, n=4; PKM, n=1; CVM,  
7  
8 426 n=1; MLM, n=1; JDM, n=1; SMM, n=1; SXM, n=1; GYM, n=1) were chosen for  
9  
10  
11 427 RNA-seq.  
12  
13

14 428 Sequencing and mapping statistic of individual ducks in genome and  
15  
16  
17 429 transcriptome analysis were detailed in supplementary files ([Supplemental](#)  
18  
19  
20 430 [Table S1, S7](#)).  
21  
22

### 23 431 Sequencing and library preparation

24  
25  
26

27 432 Genomic DNA was extracted using standard phenol/chloroform extraction  
28  
29 433 method. For each sample, two paired-end libraries (500 bp) were constructed  
30  
31  
32 434 according to manufacturer protocols (Illumina), and sequenced on the Illumina  
33  
34  
35 435 HiSeq 2500 sequencing platform. We sequenced each samples at 5X depth, in  
36  
37  
38 436 order to reduce the false negative rate of variants due to our strict filter criteria,  
39  
40  
41 437 we randomly selected one individual for 10X coverage, except for the MDN  
42  
43  
44 438 population, where we sequenced seven individuals at 5X coverage and random  
45  
46  
47 439 one at 20X coverage and the MDZ population, where we sequenced all  
48  
49  
50 440 individuals at 10X coverage. We generated a total of 628.37 Gb of paired-end  
51  
52  
53 441 reads of 100 bp (or 150 bp; MDZ) length ([Supplemental Table S1](#)).  
54

55 442 mRNA from brain, liver, and breast muscle of 14 individual ducks were  
56  
57  
58 443 extracted using standard trizol extraction methods. For each samples, two  
59  
60  
61  
62  
63  
64  
65

---

1 444 paired-end libraries (500 bp) were constructed according to manufacturer  
2  
3 445 instruction (Illumina). All samples were sequenced by Illumina Hiseq 4000  
4  
5  
6 446 sequencing platform with the coverage of 6X. We generated total of 278.62 Gb  
7  
8  
9 447 of paired-end reads of 150 bp length ([Supplemental Table S9](#)).

10  
11 448

### 12 13 14 15 449 Read alignment and variant calling

16  
17  
18  
19 450 To avoid low quality reads, mainly the result of base-calling duplicates and  
20  
21  
22 451 adapter contamination, we filtered out sequences according to the default  
23  
24  
25 452 parameters of NGS QC Toolkit (v2.3.3) [59]. Those paired reads which passed  
26  
27  
28 453 Illumina's quality control filter were aligned using BWA-MEM (v0.7.12) to  
29  
30  
31 454 version 1.0 of the *Anas platyrhynchos* genome (BGI\_duck\_1.0) [10]. Duplicate  
32  
33  
34 455 reads were removed from individual samples alignments using Picard tools  
35  
36 456 MarkDuplicates, and reads were merged using MergeSamFiles  
37  
38  
39 457 (<http://broadinstitute.github.io/picard/>).

40  
41 458 The Genome Analysis Toolkit v3.5 (GATK, RRID:SCR\_001876)  
42  
43  
44 459 RealignerTargetCreator and IndelRealigner protocol were used for global  
45  
46  
47 460 realignment of reads around INDELS before variant calling [60, 61]. SNPs and  
48  
49  
50 461 small indels (1-50 bp) were called used the GATK UnifiedGenotyper set for  
51  
52  
53 462 diploids with the parameter of minimum quality score of 20 for both mapped  
54  
55  
56 463 reads and bases to call variants, similarly to previous studies [62-66]. We  
57  
58  
59 464 filtered variants both per population and per individual using GATK according



---

1 465 to the stringent filtering criteria. For SNPs of population filter: a.) QUAL > 30.0;  
2  
3 466 b.) QD > 5.0; c.) FS < 60.0; d.) MQ > 40.0; e.) MQRankSum > -12.5; f.)  
4  
5  
6 467 ReadPosRankSum > -8.0; Additionally, if there were more than 3 SNPs  
7  
8  
9 468 clustered in a 10 bp window, all three SNPs were considered as false positives  
10  
11  
12 469 and removed [67].

13  
14 470 We used the following population criteria to identify INDELs: QUAL > 30.0,  
15  
16  
17 471 QD > 5.0, FS < 200.0, ReadPosRankSum > -20.0. Of individual filter, we also  
18  
19  
20 472 removed all INDELs and SNPs where the depth of derived variants was less  
21  
22  
23 473 than half the depth of the sequence. All SNPs and INDELs were assigned to  
24  
25  
26 474 specific genomic regions and genes using SnpEff v4.0 (SnpEff,  
27  
28 475 RRID:SCR\_005191) [68] based on the Ensembl duck annotations. After  
29  
30  
31 476 filtering a total of 36,107,949 SNPs and 3,082,731 INDELs were identified  
32  
33  
34 477 ([Supplemental Table S2](#)).

### 35 36 37 478 SNP validation

38  
39  
40  
41 479 In order to evaluate the reliability of our data, we compared our SNPs to  
42  
43  
44 480 the duck dbSNP database deposited in the Genome Variation Map (GVM) at  
45  
46  
47 481 the Big Data Center in the Beijing Institute of Genomics, Chinese Academy of  
48  
49  
50 482 Science (<http://bigd.big.ac.cn/gvm/>). 7,908,722 SNPs were validated in the  
51  
52  
53 483 duck dbSNP database, which covered 96.2% of the database ([Supplemental](#)  
54  
55 484 [Table S2](#)). For the 28,199,227 SNPs not confirmed by dbSNPs, 390 randomly  
56  
57  
58 485 selected nucleotide sites were further validated diagnostic PCR combined with  
59  
60  
61  
62  
63  
64  
65

---

1 486 Sanger sequence method described in previous researchs [8, 69, 70]. The  
2  
3 487 result showed 100% accuracy, indicating the high reliability of the called SNP  
4  
5  
6 488 variation identified in this study.  
7  
8  
9

## 10 489 Population structure

11  
12  
13  
14 490 We removed all SNPs with a minor allele frequency (MAF)  $\leq 0.1$  and kept  
15  
16  
17 491 only SNPs that occurred in more than 90% of individuals. Vcf files were  
18  
19  
20 492 converted to hapmap format with custom perl scripts, and to PLINK format file  
21  
22 493 by GLU v1.0b3 (<https://code.google.com/archive/p/glu-genetics/>) and PLINK  
23  
24  
25 494 v1.90 (PLINK, RRID:SCR\_001757) [71, 72] when appropriate. We used GCTA  
26  
27  
28 495 (v1.25) [73] for Principle Component Analysis (PCA), first by generating the  
29  
30  
31 496 genetic relationship matrix (GRM) from which the first 20 eigenvectors were  
32  
33  
34 497 extracted.  
35

36 498 To estimate individual admixture assuming different numbers of clusters,  
37  
38  
39 499 the population structure was investigated using FRAPPE v1.1 [21] base on all  
40  
41  
42 500 high quality SNPs information, with a maximum likelihood method. We  
43  
44  
45 501 increased the coancestry clusters spanning from 2 to 4 (Supplemental figure  
46  
47  
48 502 S6), because there are four duck types (wild type, meat type, egg type, and  
49  
50  
51 503 dual-purpose type) across the nine duck populations, with 10,000 iterations per  
52  
53  
54 504 run.  
55

56 505 A distance matrix was generated by calculating the pairwise allele sharing  
57  
58  
59 506 distance for each pair of all high quality SNPs. Multiple alignment of the  
60  
61  
62  
63  
64  
65

---

1 507 sequences was performed with MUSCLE v3.8 (MUSCLE, RRID:SCR\_011812)  
2  
3 508 [74]. A neighbor-joining maximum likelihood phylogenetic tree was constructed  
4  
5  
6 509 with the DNAML program in the PHYLIP package v3.69 (PHYLIP,  
7  
8  
9 510 RRID:SCR\_006244) [75] and MEGA7 [76, 77]. All implementation was  
10  
11  
12 511 performed according to the recommended manipulations of SNPPhylo [78].  
13  
14

## 15 512 Demographic history reconstruction

16  
17  
18  
19 513 The demographic history of both wild and domesticated ducks was inferred  
20  
21  
22 514 using a hidden Markov model approach as implemented in Pairwise  
23  
24  
25 515 Sequentially Markovian Coalescence based on SNP distributions [22]. In order  
26  
27  
28 516 to determine which PSMC (v0.6.5) settings were most appropriate for each  
29  
30  
31 517 population, we reset the number of free atomic time intervals (-p option), upper  
32  
33  
34 518 limit of time to most recent common ancestor (TMRCA) (-t option), and initial  
35  
36  
37 519 value of  $r = \theta/\rho$  (-r option) according to previous research [25] and online  
38  
39 520 suggestions by Li and Durbin (<https://github.com/lh3/psmc>). Based on  
40  
41  
42 521 estimated from the chicken genome, an average mutation rate ( $\mu$ ) of  $1.91 \times$   
43  
44 522  $10^{-9}$  per base per generation and a generation time (g) of 1 year were used  
45  
46  
47 523 for analysis [79].  
48

49  
50 524 Three-population demographic inference was performed using a diffusion-  
51  
52  
53 525 based approach as implemented in the program  $\partial a \partial i$  (v1.7) [80]. To minimize  
54  
55  
56 526 potential effects of selection that could interfere with demographic inference,  
57  
58 527 these analyses were performed using the subset of noncoding regions across  
59  
60  
61  
62  
63  
64  
65

---

1 528 the whole genome and spanning 750,939,264 bp in length. Noncoding SNPs  
2  
3 529 were then thinned to 1% to alleviate potential linkage between the markers. The  
4  
5  
6 530 final dataset consisted of 95,181 SNPs with an average distance of 7,112 bp ( $\pm$   
7  
8  
9 531 18,810 bp) between neighbouring SNPs. To account for missing data, the  
10  
11 532 folded allele frequency spectrum for the three populations (wild, meat and  
12  
13  
14 533 egg/dual purpose breeds) was projected down in  $\partial a \partial i$  to the projection that  
15  
16  
17 534 maximized the number of segregating SNPs, resulting in 92,966 SNPs.

19  
20 535 We tested four different scenarios to reconstruct the demographic history  
21  
22 536 of the domesticated breeds of mallards: simultaneous domestication of the  
23  
24  
25 537 meat and egg and dual purpose breeds (Model 1); a single domestication event  
26  
27  
28 538 followed by divergence of the meat and egg and dual purpose breeds (Model  
29  
30  
31 539 2); two independent domestication events, with the meat type breed being  
32  
33  
34 540 domesticated first (Model 3); and two independent domestication events, with  
35  
36  
37 541 the egg and dual purpose breed being domesticated first (Model 4). Using the  
38  
39 542 “backbone” of the best model, we then used a step-wise strategy to add  
40  
41  
42 543 parameters related with variation in population sizes and population growth,  
43  
44  
45 544 keeping a new parameter only if the Akaike information criterion (AIC) and log  
46  
47  
48 545 likelihood improved considerably over the previous model with less parameters.  
49  
50 546 In cases where additional parameters resulted in negligibly improved AIC and  
51  
52  
53 547 likelihood, we retained the simpler, less parameterized model. Gene flow was  
54  
55  
56 548 modelled as continuous migration events after population divergence. Each  
57  
58  
59 549 model was run at least ten times from independent starting values to ensure  
60  
61  
62  
63  
64  
65

---

1 550 convergence to the same parameter estimates. We rejected models where we  
2  
3 551 failed to obtain convergence across the replicate runs. Scaled parameters for  
4  
5  
6 552 the best-supported model were transformed into real values using the same  
7  
8  
9 553 average mutation rate ( $\mu$ ) and ( $g$ ) as described above for the PSMC analysis.  
10  
11 554 Parameter uncertainty was obtained using the Godambe Information Matrix  
12  
13  
14 555 (GIM) [81] from 100 non-parametric bootstraps.  
15  
16

### 17 556 Selective-sweep analysis

18  
19  
20  
21  
22 557 In order to define candidate regions having undergone directional selection  
23  
24  
25 558 during duck domestication we calculated the coefficient of nucleotide  
26  
27  
28 559 differentiation ( $F_{ST}$ ) between mallards and domesticated ducks described by  
29  
30  
31 560 Weir & Cockerham [82]. We calculated the average  $F_{ST}$  in 10kb windows with  
32  
33  
34 561 a 5 kb shift for all seven domesticated duck populations combined, and two  
35  
36 562 mallard populations combined. Only scaffolds longer than 10 kb, 2368 of 78488  
37  
38  
39 563 scaffolds, were chosen for the analysis. We transformed observed  $F_{ST}$  values  
40  
41  
42 564 to Z transformation ( $Z(F_{ST})$ ) with  $\mu = 0.1154$  and  $\sigma = 0.0678$  according to  
43  
44  
45 565 previously described methods [83].  
46

47 566 To estimate levels of nucleotide diversity ( $\pi$ ) across all sampled  
48  
49  
50 567 populations we used the VCFtools software (v0.1.13) [84] to calculate  
51  
52  
53 568  $\theta\pi(\text{wild/domesticated})$  [85], computing the average difference per locus over  
54  
55  
56 569 each pair of accessions. As the measurement of  $F_{ST}$ , averaged  $\pi$  ratio  
57  
58 570 ( $\theta\pi(\text{wild/domesticated})$ ) was calculated for each scaffold in 10kb sliding  
59  
60  
61  
62  
63  
64  
65

---

1 571 windows.

2  
3 572 Functional classification of GO categories was performed in Database for  
4  
5  
6 573 Annotation, Visualization and Integrated Discovery (DAVID, v6.8) [86].  
7  
8  
9 574 Statistical significance was accessed by using a modified Fisher's exact test  
10  
11  
12 575 and Benjamini correction for multiple testing.  
13

14  
15 576 RNA-seq and data processing  
16

17  
18  
19 577 To infer whether novel allelic variants located in the top 5%  $F_{ST}$  regions of  
20  
21  
22 578 genome comparison between wild mallards and domesticated ducks could also  
23  
24  
25 579 affecting gene expression, we compared gene expression in brain, liver and in  
26  
27  
28 580 breast muscle between wild mallards and domesticated ducks. To make our  
29  
30  
31 581 result more universal, 7 male mallards and 7 male domesticated ducks were  
32  
33  
34 582 choose for RNA-seq. All samples were individually sequenced by Illumina  
35  
36 583 Highseq 4000 sequencing platform.  
37

38  
39 584 For each sample, adapters and primers of paired end reads were removed  
40  
41  
42 585 by NGSQC Tool kit (v2.3.3) [59]. For each paired end read pair, if one of two  
43  
44  
45 586 reads had an average base quality less than 20 (PHRED quality score), then  
46  
47  
48 587 both reads were removed. If one end of paired end read had percentage of high  
49  
50  
51 588 quality base less than 70%, the two paired reads also removed. After that high-  
52  
53  
54 589 quality reads were mapped to reference genome using STAR (v.2.5.3a) [87].  
55  
56  
57 590 The *featureCounts* function of the *Rsubread* (v.1.5.2) [88, 89] was used to  
58  
59  
60 591 output the counts of reads aligning to each gene. We detected the differential  
61  
62  
63  
64  
65

---

1 592 expression genes with edgeR (v3.6) [90-93] using a  $p_{adj} < 0.05$  threshold.

2  
3 **593 Availability of supporting data and materials**

4  
5  
6 594 The 78 ducks used in whole genome resequencing analysis and the 14  
7  
8  
9 595 ducks used in RNA-seq analysis are accessible at NCBI under BioProject  
10  
11 596 accession numbers PRJNA419832 and PRJNA419583, respectively. The  
12  
13  
14 597 unasssembled sequencing reads of 78 ducks and RNA-seq reads of 14  
15  
16  
17 598 ducks have been deposited in NCBI Sequence Read Archive (SRA) under  
18  
19  
20 599 accession numbers SRP125660 and SRP125529, respectively. All VCF files of  
21  
22  
23 600 SNPs and INDELs and other supporting data, such as scripts, alignments for  
24  
25  
26 601 phylogenetic trees and sweep regions, are available via the *GigaScience*  
27  
28 602 database *GigaDB*[94].

29  
30  
31  
32 **603 Declarations**

33  
34  
35  
36 604 Funding

37  
38  
39  
40 605 This work was supported by the earmarked fund for the Beijing Innovation  
41  
42 606 Team of the Modern Agro-industry Technology Research System (BAIC04-  
43  
44  
45 607 2017), European Research Council (grant agreement 680951) and Wolfson  
46  
47  
48 608 Merit Award. We gratefully acknowledge our colleagues in the Poultry Team at  
49  
50  
51 609 the National Engineering Laboratory for Animal Breeding of China Agricultural  
52  
53  
54 610 University, for their assistance on sample collection and helpful comments on  
55  
56 611 the manuscript.

---

1 612 Authors' contributions

2  
3  
4 613 Conceived and designed the experiments: Lujiang Qu. Wrote the paper:  
5  
6  
7 614 Zebin Zhang. Revised the paper: Lujiang Qu, Judith E Mank, Marcel van Tuinen.  
8  
9  
10 615 Analyzed the data: Zebin Zhang, Pedro Almeida, Qiong Wang, Yaxiong Jia.  
11  
12 616 Performed the experiments: Zebin Zhang, Yaxiong Jia. Contributed  
13  
14  
15 617 reagents/materials: Zhihua Jiang, Yu Chen, Kai Zhan, Shuisheng Hou,  
16  
17  
18 618 Zhengkui Zhou, Huifang Li, Fangxi Yang, Yong He, Zhonghua Ning, and Ning  
19  
20  
21 619 Yang.

22  
23  
24  
25 620 **References**

- 26  
27  
28 621 1. Li J and Zhang Y. Advances in research of the origin and  
29 622 domestication of domestic animals. *Biodiversity Science*. 2009;17 4:319-  
30 623 29.  
31  
32 624 2. Darwin C and Mayr E. On the origin of species by means of  
33 625 natural selection, or the preservation of favoured races in the struggle  
34 626 for life. John Murray, London. On the Origin of Species by Means of  
35 627 Natural Selection. 1859.  
36  
37 628 3. Chen C, Liu Z, Pan Q, Chen X, Wang H, Guo H, et al. Genomic  
38 629 Analyses Reveal Demographic History and Temperate Adaptation of the  
39 630 Newly Discovered Honey Bee Subspecies *Apis mellifera sinixinyuan* n.  
40 631 ssp. *Mol Biol Evol*. 2016;33 5:1337-48. doi:10.1093/molbev/msw017.  
41  
42 632 4. Yang J, Li WR, Lv FH, He SG, Tian SL, Peng WF, et al. Whole-  
43 633 Genome Sequencing of Native Sheep Provides Insights into Rapid  
44 634 Adaptations to Extreme Environments. *Mol Biol Evol*. 2016;33 10:2576-  
45 635 92. doi:10.1093/molbev/msw129.  
46  
47 636 5. Li M, Tian S, Jin L, Zhou G, Li Y, Zhang Y, et al. Genomic  
48 637 analyses identify distinct patterns of selection in domesticated pigs and  
49 638 Tibetan wild boars. *Nat Genet*. 2013;45 12:1431-8. doi:10.1038/ng.2811.  
50  
51 639 6. Jiang Y, Xie M, Chen W, Talbot R, Maddox JF, Faraut T, et al.  
52 640 The sheep genome illuminates biology of the rumen and lipid  
53 641 metabolism. *Science*. 2014;344 6188:1168-73.  
54 642 doi:10.1126/science.1252806.  
55  
56 643 7. Carneiro M, Rubin CJ, Di Palma F, Albert FW, Alföldi J, Barrio  
57 644 AM, et al. Rabbit genome analysis reveals a polygenic basis for



---

phenotypic change during domestication. *Science*. 2014;345:6200:1074-9. doi:10.1126/science.1253714.

8. Wang MS, Zhang RW, Su LY, Li Y, Peng MS, Liu HQ, et al. Positive selection rather than relaxation of functional constraint drives the evolution of vision during chicken domestication. *Cell Res*. 2016;26(5):556-73. doi:10.1038/cr.2016.44.

9. Rubin CJ, Zody MC, Eriksson J, Meadows JR, Sherwood E, Webster MT, et al. Whole-genome resequencing reveals loci under selection during chicken domestication. *Nature*. 2010;464(7288):587-91. doi:10.1038/nature08832.

10. Huang Y, Li Y, Burt DW, Chen H, Zhang Y, Qian W, et al. The duck genome and transcriptome provide insight into an avian influenza virus reservoir species. *Nat Genet*. 2013;45(7):776-83. doi:10.1038/ng.2657.

11. Zeuner FE. *A history of domesticated animals. A history of domesticated animals*. 1963.

12. Thomson SAL, Ornithologists' Union B and Thomson AL. *A new dictionary of birds*. Nelson London; 1964.

13. Mason IL and Mason IL. *Evolution of domesticated animals*. 1984.

14. Bray F and Needham J. *Science and Civilization in China*, vol. 6, part 1. Agriculture: Cambridge University Press, Cambridge, UK. 1984.

15. Kiple KF. *The Cambridge world history of food*. Cambridge: Cambridge University Press; 2000.

16. Chang H. *Conspectus of genetic resources of livestock*. Chinese Agriculture Press, Beijing, China, 1995.

17. Miller DB. Social displays of Mallard Ducks (*Anas platyrhynchos*): effects of domestication. *Journal of Comparative and Physiological Psychology*. 1977;91(2):221.

18. Ebinger P. Domestication and plasticity of brain organization in mallards (*Anas platyrhynchos*). *Brain, behavior and evolution*. 1995;45(5):286-300.

19. Frahm H, Rehkämper G and Werner C. Brain alterations in crested versus non-crested breeds of domestic ducks (*Anas platyrhynchos* fd). *Poultry science*. 2001;80(9):1249-57.

20. Duggan BM, Hocking PM, Schwarz T and Clements DN. Differences in hindlimb morphology of ducks and chickens: effects of domestication and selection. *Genetics Selection Evolution*. 2015;47(1):88.

21. Tang H, Peng J, Wang P and Risch NJ. Estimation of individual admixture: analytical and study design considerations. *Genet Epidemiol*. 2005;28(4):289-301. doi:10.1002/gepi.20064.

22. Li H and Durbin R. Inference of human population history from individual whole-genome sequences. *Nature*. 2011;475(7357):493-6. doi:10.1038/nature10231.

- 
- 689 23. Ehlers J and Gibbard PL. The extent and chronology of  
690 Cenozoic global glaciation. *Quaternary International*. 2007;164:6-20.
- 691 24. Williams MAJ, Dunkerley D, De Deckker P, Kershaw AP and  
692 Stokes T. *Quaternary environments*. Science Press; 1997.
- 693 25. Nadachowska-Brzyska K, Li C, Smeds L, Zhang G and  
694 Ellegren H. Temporal Dynamics of Avian Populations during Pleistocene  
695 Revealed by Whole-Genome Sequences. *Curr Biol*. 2015;25 10:1375-  
696 80. doi:10.1016/j.cub.2015.03.047.
- 697 26. Shapiro MD, Kronenberg Z, Li C, Domyan ET, Pan H, Campbell  
698 M, et al. Genomic diversity and evolution of the head crest in the rock  
699 pigeon. *Science*. 2013;339 6123:1063-7. doi:10.1126/science.1230422.
- 700 27. Price TD. Domesticated birds as a model for the genetics of  
701 speciation by sexual selection. *Genetica*. 2002;116 2-3:311-27. doi:Doi  
702 10.1023/A:1021248913179.
- 703 28. Lorenzen ED, Nogués-Bravo D, Orlando L, Weinstock J,  
704 Binladen J, Marske KA, et al. Species-specific responses of Late  
705 Quaternary megafauna to climate and humans. *Nature*. 2011;479  
706 7373:359-64.
- 707 29. Hewitt G. The genetic legacy of the Quaternary ice ages.  
708 *Nature*. 2000;405 6789:907-13.
- 709 30. Hewitt G. Genetic consequences of climatic oscillations in the  
710 Quaternary. *Philosophical Transactions of the Royal Society of London*  
711 *B: Biological Sciences*. 2004;359 1442:183-95.
- 712 31. Qiu Q, Wang L, Wang K, Yang Y, Ma T, Wang Z, et al. Yak  
713 whole-genome resequencing reveals domestication signatures and  
714 prehistoric population expansions. *Nature communications*.  
715 2015;6:10283. doi:10.1038/ncomms10283.
- 716 32. Orlando L, Ginolhac A, Zhang G, Froese D, Albrechtsen A,  
717 Stiller M, et al. Recalibrating Equus evolution using the genome  
718 sequence of an early Middle Pleistocene horse. *Nature*. 2013;499  
719 7456:74-8. doi:10.1038/nature12323.
- 720 33. Steingrimsson E, Copeland NG and Jenkins NA. Melanocytes  
721 and the microphthalmia transcription factor network. *Annual review of*  
722 *genetics*. 2004;38:365-411.  
723 doi:10.1146/annurev.genet.38.072902.092717.
- 724 34. Hallsson JH, Haflidadottir BS, Schepsky A, Arnheiter H and  
725 Steingrimsson E. Evolutionary sequence comparison of the Mitf gene  
726 reveals novel conserved domains. *Pigment cell research*. 2007;20  
727 3:185-200. doi:10.1111/j.1600-0749.2007.00373.x.
- 728 35. Levy C, Khaled M and Fisher DE. MITF: master regulator of  
729 melanocyte development and melanoma oncogene. *Trends in molecular*  
730 *medicine*. 2006;12 9:406-14. doi:10.1016/j.molmed.2006.07.008.
- 731 36. Minvielle F, Bed'hom B, Coville JL, Ito S, Inoue-Murayama M  
732 and Gourichon D. The "silver" Japanese quail and the MITF gene: causal

---

733 mutation, associated traits and homology with the "blue" chicken  
734 plumage. BMC genetics. 2010;11:15. doi:10.1186/1471-2156-11-15.

735 37. Karlsson EK, Baranowska I, Wade CM, Salmon Hillbertz NH,  
736 Zody MC, Anderson N, et al. Efficient mapping of mendelian traits in  
737 dogs through genome-wide association. Nat Genet. 2007;39 11:1321-8.  
738 doi:10.1038/ng.2007.10.

739 38. Li S, Wang C, Yu W, Zhao S and Gong Y. Identification of genes  
740 related to white and black plumage formation by RNA-Seq from white  
741 and black feather bulbs in ducks. PLoS One. 2012;7 5:e36592.  
742 doi:10.1371/journal.pone.0036592.

743 39. Sultana H, Seo D, Choi NR, Bhuiyan MSA, Lee SH, Heo KN,  
744 et al. Identification of Polymorphisms in MITF and DCT Genes and their  
745 Associations with Plumage Colors in Asian Duck Breeds. Asian-  
746 Australasian journal of animal sciences. 2017;  
747 doi:10.5713/ajas.17.0298.

748 40. Eriksson M, Nilsson A, Samuelsson H, Samuelsson EB, Mo L,  
749 Akesson E, et al. On the role of NR3A in human NMDA receptors.  
750 Physiology & behavior. 2007;92 1-2:54-9.  
751 doi:10.1016/j.physbeh.2007.05.026.

752 41. Bauer PH, Muller S, Puzicha M, Pippig S, Obermaier B,  
753 Helmreich EJM, et al. Phosducin Is a Protein Kinase-a-Regulated G-  
754 Protein Regulator. Nature. 1992;358 6381:73-6. doi:Doi  
755 10.1038/358073a0.

756 42. Sunayashiki-Kusuzaki K, Kikuchi T, Wawrousek EF and  
757 Shinohara T. Arrestin and phosducin are expressed in a small number of  
758 brain cells. Brain research Molecular brain research. 1997;52 1:112-20.

759 43. Mignon-Grasteau S, Boissy A, Bouix J, Faure J-M, Fisher AD,  
760 Hinch GN, et al. Genetics of adaptation and domestication in livestock.  
761 Livestock Production Science. 2005;93 1:3-14.

762 44. Dugatkin LA and Trut L. How to Tame a Fox (and Build a Dog):  
763 Visionary Scientists and a Siberian Tale of Jump-Started Evolution.  
764 University of Chicago Press; 2017.

765 45. Axelsson E, Ratnakumar A, Arendt ML, Maqbool K, Webster  
766 MT, Perloski M, et al. The genomic signature of dog domestication  
767 reveals adaptation to a starch-rich diet. Nature. 2013;495 7441:360-4.  
768 doi:10.1038/nature11837.

769 46. Volinia S, Dhand R, Vanhaesebroeck B, MacDougall L, Stein R,  
770 Zvelebil M, et al. A human phosphatidylinositol 3-kinase complex related  
771 to the yeast Vps34p-Vps15p protein sorting system. The EMBO Journal.  
772 1995;14 14:3339.

773 47. Inaguma Y, Ito H, Iwamoto I, Matsumoto A, Yamagata T, Tabata  
774 H, et al. Morphological characterization of Class III phosphoinositide 3-  
775 kinase during mouse brain development. Medical molecular morphology.  
776 2016;49 1:28-33. doi:10.1007/s00795-015-0116-1.

1  
2  
3  
4  
5  
6  
7  
8  
9  
10  
11  
12  
13  
14  
15  
16  
17  
18  
19  
20  
21  
22  
23  
24  
25  
26  
27  
28  
29  
30  
31  
32  
33  
34  
35  
36  
37  
38  
39  
40  
41  
42  
43  
44  
45  
46  
47  
48  
49  
50  
51  
52  
53  
54  
55  
56  
57  
58  
59  
60  
61  
62  
63  
64  
65

- 
- 777 48. Stopkova P, Saito T, Papolos DF, Vevera J, Paclt I, Zukov I, et  
778 al. Identification of PIK3C3 promoter variant associated with bipolar  
779 disorder and schizophrenia. *Biol Psychiatry*. 2004;55 10:981-8.  
780 doi:10.1016/j.biopsych.2004.01.014.
- 781 49. Tang R, Zhao X, Fang C, Tang W, Huang K, Wang L, et al.  
782 Investigation of variants in the promoter region of PIK3C3 in  
783 schizophrenia. *Neuroscience letters*. 2008;437 1:42-4.  
784 doi:10.1016/j.neulet.2008.03.043.
- 785 50. Zhou X, Wang L, Hasegawa H, Amin P, Han B-X, Kaneko S, et  
786 al. Deletion of PIK3C3/Vps34 in sensory neurons causes rapid  
787 neurodegeneration by disrupting the endosomal but not the autophagic  
788 pathway. *Proceedings of the National Academy of Sciences*. 2010;107  
789 20:9424-9.
- 790 51. Wilson PA, Gardner SD, Lambie NM, Commans SA and  
791 Crowther DJ. Characterization of the human patatin-like phospholipase  
792 family. *Journal of lipid research*. 2006;47 9:1940-9.
- 793 52. Kienesberger PC, Oberer M, Lass A and Zechner R.  
794 Mammalian patatin domain containing proteins: a family with diverse  
795 lipolytic activities involved in multiple biological functions. *Journal of lipid*  
796 *research*. 2009;50 Supplement:S63-S8.
- 797 53. Tesson C, Nawara M, Salih MA, Rossignol R, Zaki MS, Al Balwi  
798 M, et al. Alteration of fatty-acid-metabolizing enzymes affects  
799 mitochondrial form and function in hereditary spastic paraplegia. *The*  
800 *American Journal of Human Genetics*. 2012;91 6:1051-64.
- 801 54. Schuurs-Hoeijmakers JH, Oh EC, Vissers LE, Swinkels ME,  
802 Gilissen C, Willemsen MA, et al. Recurrent de novo mutations in PACS1  
803 cause defective cranial-neural-crest migration and define a recognizable  
804 intellectual-disability syndrome. *The American Journal of Human*  
805 *Genetics*. 2012;91 6:1122-7.
- 806 55. Martin E, Schüle R, Smets K, Rastetter A, Boukhris A, Loureiro  
807 JL, et al. Loss of function of glucocerebrosidase GBA2 is responsible for  
808 motor neuron defects in hereditary spastic paraplegia. *The American*  
809 *Journal of Human Genetics*. 2013;92 2:238-44.
- 810 56. Gagliano SA, Tiwari AK, Freeman N, Lieberman JA, Meltzer HY,  
811 Kennedy JL, et al. Protein kinase cAMP-dependent regulatory type II  
812 beta (PRKAR2B) gene variants in antipsychotic-induced weight gain.  
813 *Human psychopharmacology*. 2014;29 4:330-5. doi:10.1002/hup.2407.
- 814 57. Czyzyk TA, Sikorski MA, Yang L and McKnight GS. Disruption  
815 of the RII $\beta$  subunit of PKA reverses the obesity syndrome of agouti lethal  
816 yellow mice. *Proceedings of the National Academy of Sciences*.  
817 2008;105 1:276-81.
- 818 58. Resources CNCoAG. Animal genetic resources in China  
819 poultry. Beijing: China Agriculture Press; 2010.
- 820 59. Patel RK and Jain M. NGS QC Toolkit: a toolkit for quality

---

control of next generation sequencing data. PLoS One. 2012;7 2:e30619. doi:10.1371/journal.pone.0030619.

60. McKenna A, Hanna M, Banks E, Sivachenko A, Cibulskis K, Kernytsky A, et al. The Genome Analysis Toolkit: a MapReduce framework for analyzing next-generation DNA sequencing data. *Genome Res.* 2010;20 9:1297-303. doi:10.1101/gr.107524.110.

61. DePristo MA, Banks E, Poplin R, Garimella KV, Maguire JR, Hartl C, et al. A framework for variation discovery and genotyping using next-generation DNA sequencing data. *Nat Genet.* 2011;43 5:491-8. doi:10.1038/ng.806.

62. Yan Y, Yi G, Sun C, Qu L and Yang N. Genome-wide characterization of insertion and deletion variation in chicken using next generation sequencing. *PLoS One.* 2014;9 8:e104652. doi:10.1371/journal.pone.0104652.

63. Qu Y, Tian S, Han N, Zhao H, Gao B, Fu J, et al. Genetic responses to seasonal variation in altitudinal stress: whole-genome resequencing of great tit in eastern Himalayas. *Sci Rep.* 2015;5:14256. doi:10.1038/srep14256.

64. Meyer RS, Choi JY, Sanches M, Plessis A, Flowers JM, Amas J, et al. Domestication history and geographical adaptation inferred from a SNP map of African rice. *Nat Genet.* 2016;48 9:1083-8. doi:10.1038/ng.3633.

65. Russell J, Mascher M, Dawson IK, Kyriakidis S, Calixto C, Freund F, et al. Exome sequencing of geographically diverse barley landraces and wild relatives gives insights into environmental adaptation. *Nat Genet.* 2016;48 9:1024-30. doi:10.1038/ng.3612.

66. Mascher M, Schuenemann VJ, Davidovich U, Marom N, Himmelbach A, Hubner S, et al. Genomic analysis of 6,000-year-old cultivated grain illuminates the domestication history of barley. *Nat Genet.* 2016;48 9:1089-93. doi:10.1038/ng.3611.

67. Li H, Ruan J and Durbin R. Mapping short DNA sequencing reads and calling variants using mapping quality scores. *Genome Res.* 2008;18 11:1851-8. doi:10.1101/gr.078212.108.

68. Cingolani P, Platts A, Wang LL, Coon M, Nguyen T, Wang L, et al. A program for annotating and predicting the effects of single nucleotide polymorphisms, SnpEff: SNPs in the genome of *Drosophila melanogaster* strain w1118; iso-2; iso-3. *Fly.* 2012;6 2:80-92.

69. Zhang Z, Nie C, Jia Y, Jiang R, Xia H, Lv X, et al. Parallel Evolution of Polydactyly Traits in Chinese and European Chickens. *PLoS one.* 2016;11 2:e0149010.

70. Van Tassell CP, Smith TP, Matukumalli LK, Taylor JF, Schnabel RD, Lawley CT, et al. SNP discovery and allele frequency estimation by deep sequencing of reduced representation libraries. *Nature methods.* 2008;5 3:247-52. doi:10.1038/nmeth.1185.

---

865 71. Purcell S, Neale B, Todd-Brown K, Thomas L, Ferreira MA,  
866 Bender D, et al. PLINK: a tool set for whole-genome association and  
867 population-based linkage analyses. *The American Journal of Human*  
868 *Genetics*. 2007;81 3:559-75.

869 72. Chang CC, Chow CC, Tellier LC, Vattikuti S, Purcell SM and  
870 Lee JJ. Second-generation PLINK: rising to the challenge of larger and  
871 richer datasets. *Gigascience*. 2015;4 1:7.

872 73. Yang J, Lee SH, Goddard ME and Visscher PM. GCTA: a tool  
873 for genome-wide complex trait analysis. *The American Journal of*  
874 *Human Genetics*. 2011;88 1:76-82.

875 74. Edgar RC. MUSCLE: multiple sequence alignment with high  
876 accuracy and high throughput. *Nucleic acids research*. 2004;32 5:1792-  
877 7.

878 75. Plotree D and Plotgram D. PHYLIP-phylogeny inference  
879 package (version 3.2). *cladistics*. 1989;5 163:6.

880 76. Tamura K, Dudley J, Nei M and Kumar S. MEGA4: molecular  
881 evolutionary genetics analysis (MEGA) software version 4.0. *Molecular*  
882 *biology and evolution*. 2007;24 8:1596-9.

883 77. Kumar S, Stecher G and Tamura K. MEGA7: Molecular  
884 Evolutionary Genetics Analysis Version 7.0 for Bigger Datasets. *Mol Biol*  
885 *Evol*. 2016;33 7:1870-4. doi:10.1093/molbev/msw054.

886 78. Lee TH, Guo H, Wang X, Kim C and Paterson AH. SNPhylo: a  
887 pipeline to construct a phylogenetic tree from huge SNP data. *BMC*  
888 *genomics*. 2014;15 1:162. doi:10.1186/1471-2164-15-162.

889 79. Nam K, Mugal C, Nabholz B, Schielzeth H, Wolf JB, Backström  
890 N, et al. Molecular evolution of genes in avian genomes. *Genome biology*.  
891 2010;11 6:R68.

892 80. Gutenkunst RN, Hernandez RD, Williamson SH and  
893 Bustamante CD. Inferring the joint demographic history of multiple  
894 populations from multidimensional SNP frequency data. *PLoS genetics*.  
895 2009;5 10:e1000695. doi:10.1371/journal.pgen.1000695.

896 81. Coffman AJ, Hsieh PH, Gravel S and Gutenkunst RN.  
897 Computationally Efficient Composite Likelihood Statistics for  
898 Demographic Inference. *Molecular Biology and Evolution*. 2016;33  
899 2:591-3. doi:10.1093/molbev/msv255.

900 82. Weir BS and Cockerham CC. Estimating F-Statistics for the  
901 Analysis of Population-Structure. *Evolution*. 1984;38 6:1358-70. doi:Doi  
902 10.2307/2408641.

903 83. Kreyszig E. *Advanced engineering mathematics*. John Wiley &  
904 Sons; 2007.

905 84. Danecek P, Auton A, Abecasis G, Albers CA, Banks E, DePristo  
906 MA, et al. The variant call format and VCFtools. *Bioinformatics*. 2011;27  
907 15:2156-8.

908 85. Tajima F. Evolutionary relationship of DNA sequences in finite

---

909 populations. *Genetics*. 1983;105 2:437-60.

1 910 86. Huang da W, Sherman BT and Lempicki RA. Systematic and  
2 911 integrative analysis of large gene lists using DAVID bioinformatics  
3 912 resources. *Nature protocols*. 2009;4 1:44-57.  
4 913 doi:10.1038/nprot.2008.211.

5 914 87. Dobin A, Davis CA, Schlesinger F, Drenkow J, Zaleski C, Jha  
6 915 S, et al. STAR: ultrafast universal RNA-seq aligner. *Bioinformatics*.  
7 916 2013;29 1:15-21.

8 917 88. Liao Y, Smyth GK and Shi W. The Subread aligner: fast,  
9 918 accurate and scalable read mapping by seed-and-vote. *Nucleic acids*  
10 919 *research*. 2013;41 10:e108-e.

11 920 89. Liao Y, Smyth GK and Shi W. featureCounts: an efficient  
12 921 general purpose program for assigning sequence reads to genomic  
13 922 features. *Bioinformatics*. 2014;30 7:923-30.  
14 923 doi:10.1093/bioinformatics/btt656.

15 924 90. Robinson MD and Smyth GK. Moderated statistical tests for  
16 925 assessing differences in tag abundance. *Bioinformatics*. 2007;23  
17 926 21:2881-7. doi:10.1093/bioinformatics/btm453.

18 927 91. Robinson MD, McCarthy DJ and Smyth GK. edgeR: a  
19 928 Bioconductor package for differential expression analysis of digital gene  
20 929 expression data. *Bioinformatics*. 2010;26 1:139-40.  
21 930 doi:10.1093/bioinformatics/btp616.

22 931 92. McCarthy DJ, Chen Y and Smyth GK. Differential expression  
23 932 analysis of multifactor RNA-Seq experiments with respect to biological  
24 933 variation. *Nucleic acids research*. 2012;40 10:4288-97.  
25 934 doi:10.1093/nar/gks042.

26 935 93. Lun AT, Chen Y and Smyth GK. It's DE-licious: a recipe for  
27 936 differential expression analyses of RNA-seq experiments using quasi-  
28 937 likelihood methods in edgeR. *Statistical Genomics: Methods and*  
29 938 *Protocols*. 2016:391-416.

30 939 94. Zhang Z, Jia Y, Almeida P, Mank JE, Tuinen MV, Wang Q et al.  
31 940 Supporting data for "Whole-genome resequencing reveals signatures of  
32 941 selection and timing of duck domestication". *GigaScience database*  
33 942 2018. <http://dx.doi.org/10.5524/100417>  
34 943

1  
2  
3  
4  
5  
6  
7  
8  
9  
10  
11  
12  
13  
14  
15  
16  
17  
18  
19  
20  
21  
22  
23  
24  
25  
26  
27  
28  
29  
30  
31  
32  
33  
34  
35  
36  
37  
38  
39  
40  
41  
42  
43  
44  
45  
46  
47  
48  
49  
50  
51  
52  
53  
54  
55  
56  
57  
58  
59  
60  
61  
62  
63  
64  
65

Figure 1

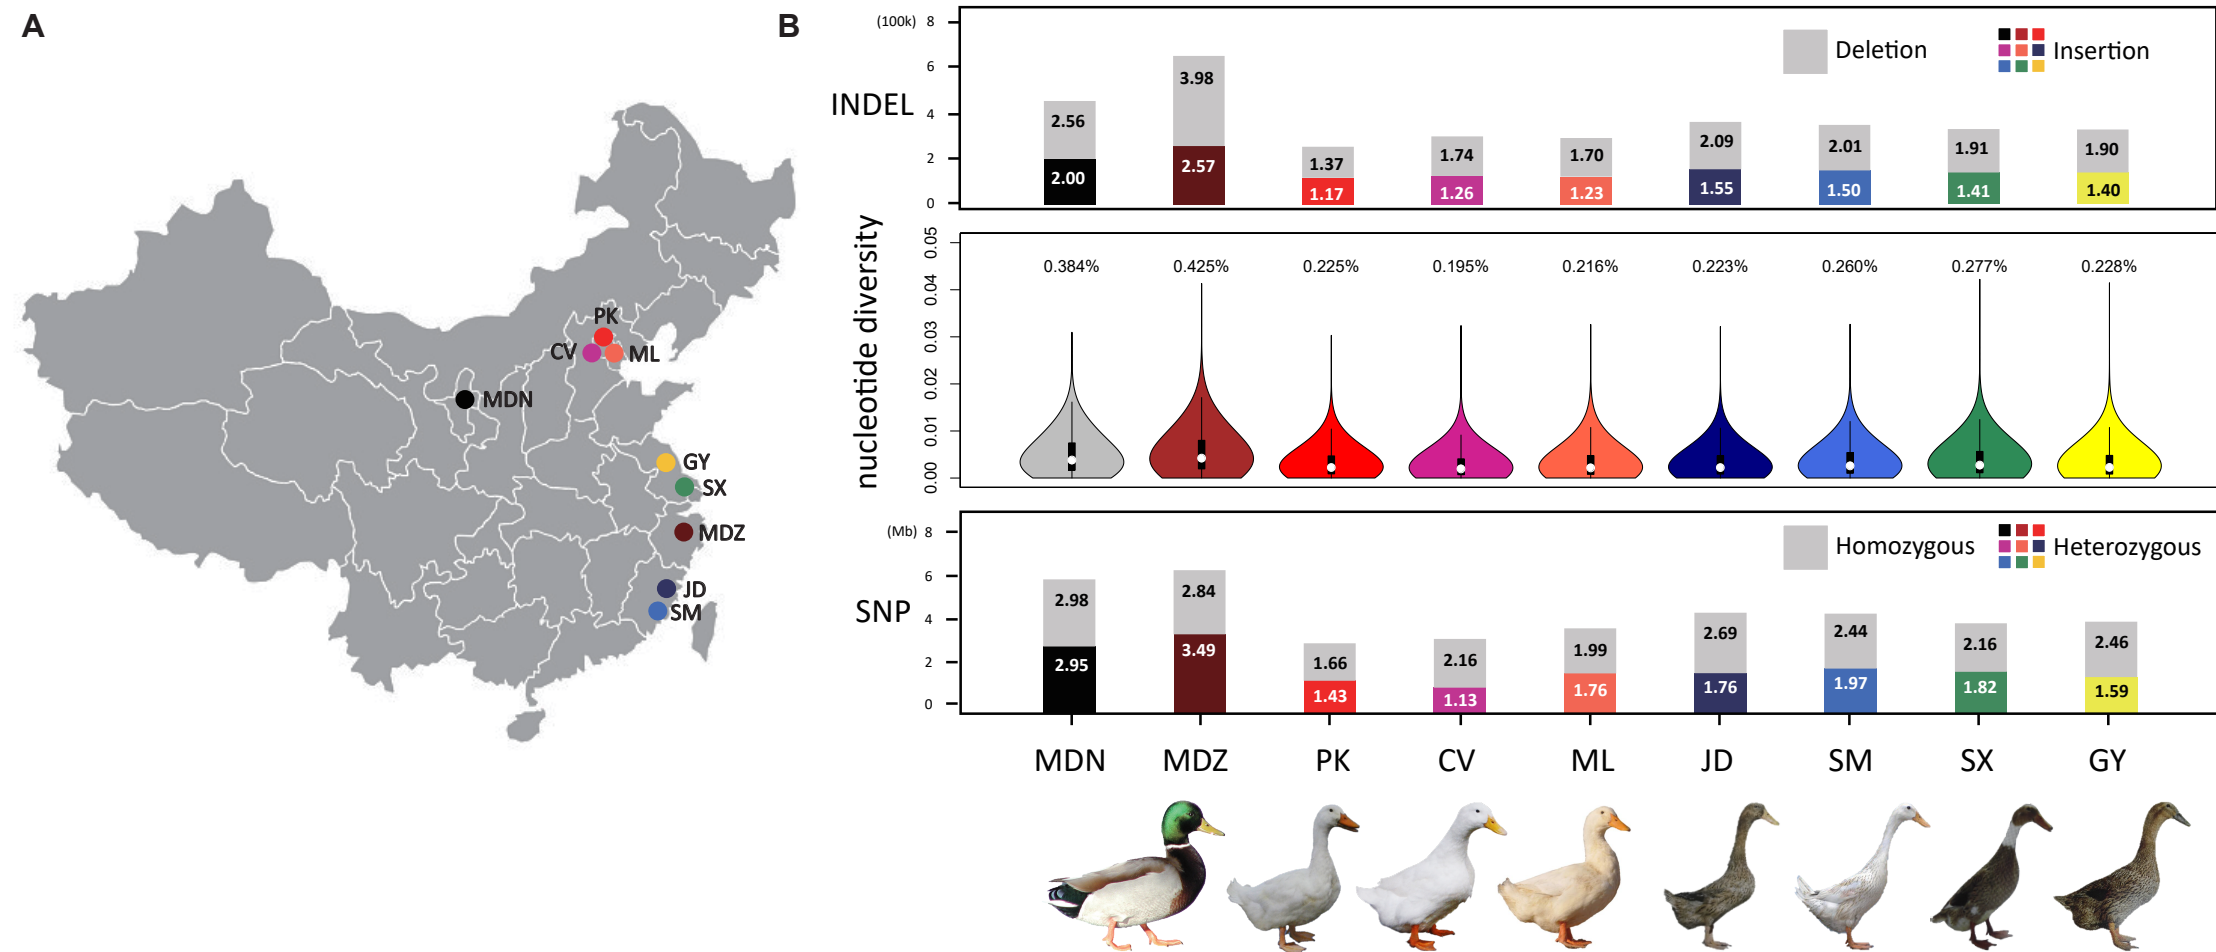



Figure 2

[Click here to download Figure Fig. 2.pdf](#)**A**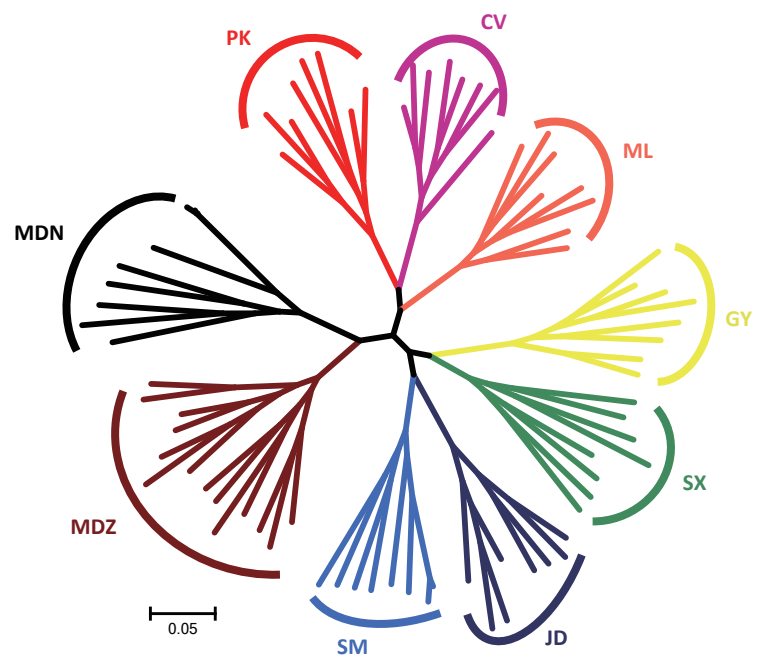**B**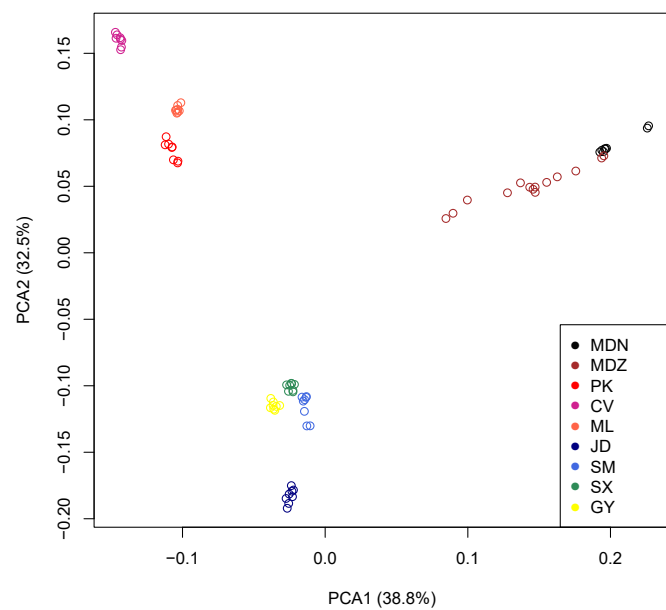**C**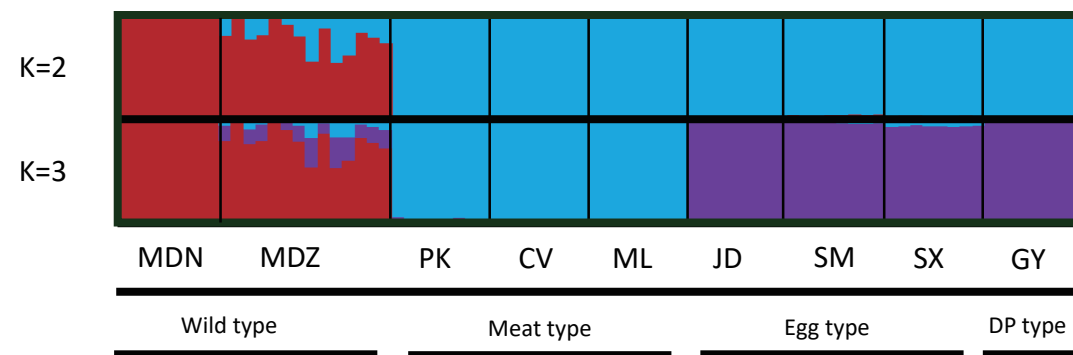**D**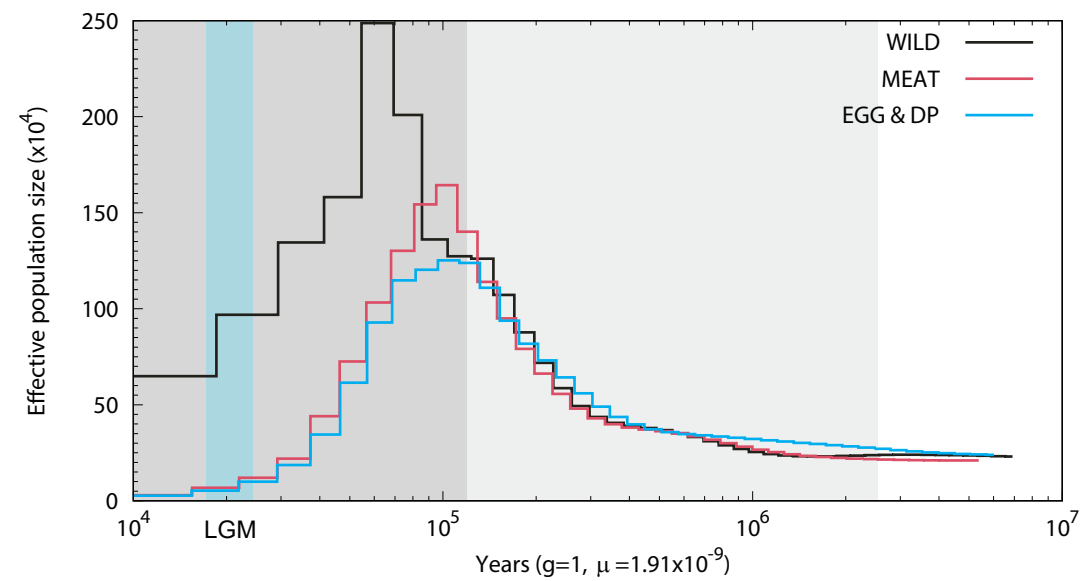

A

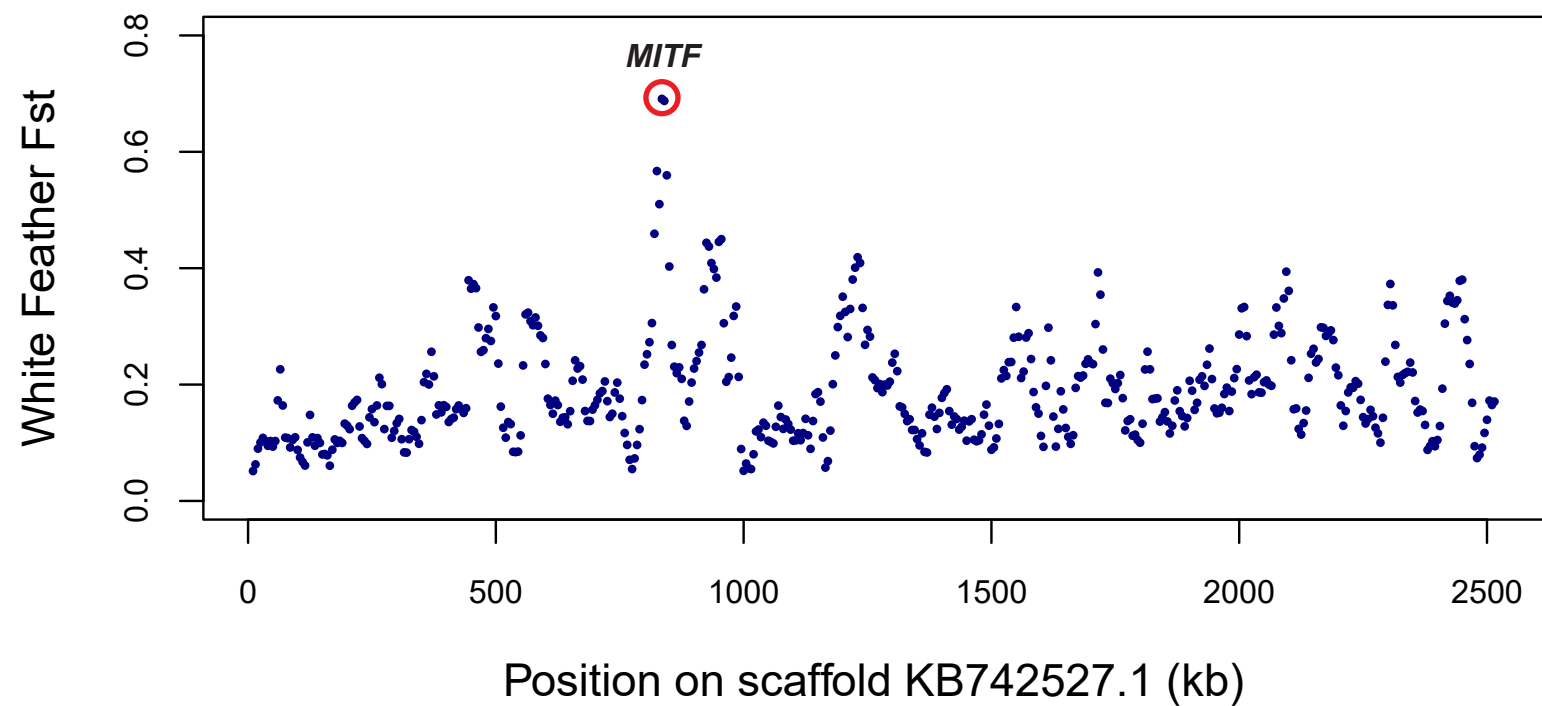

B

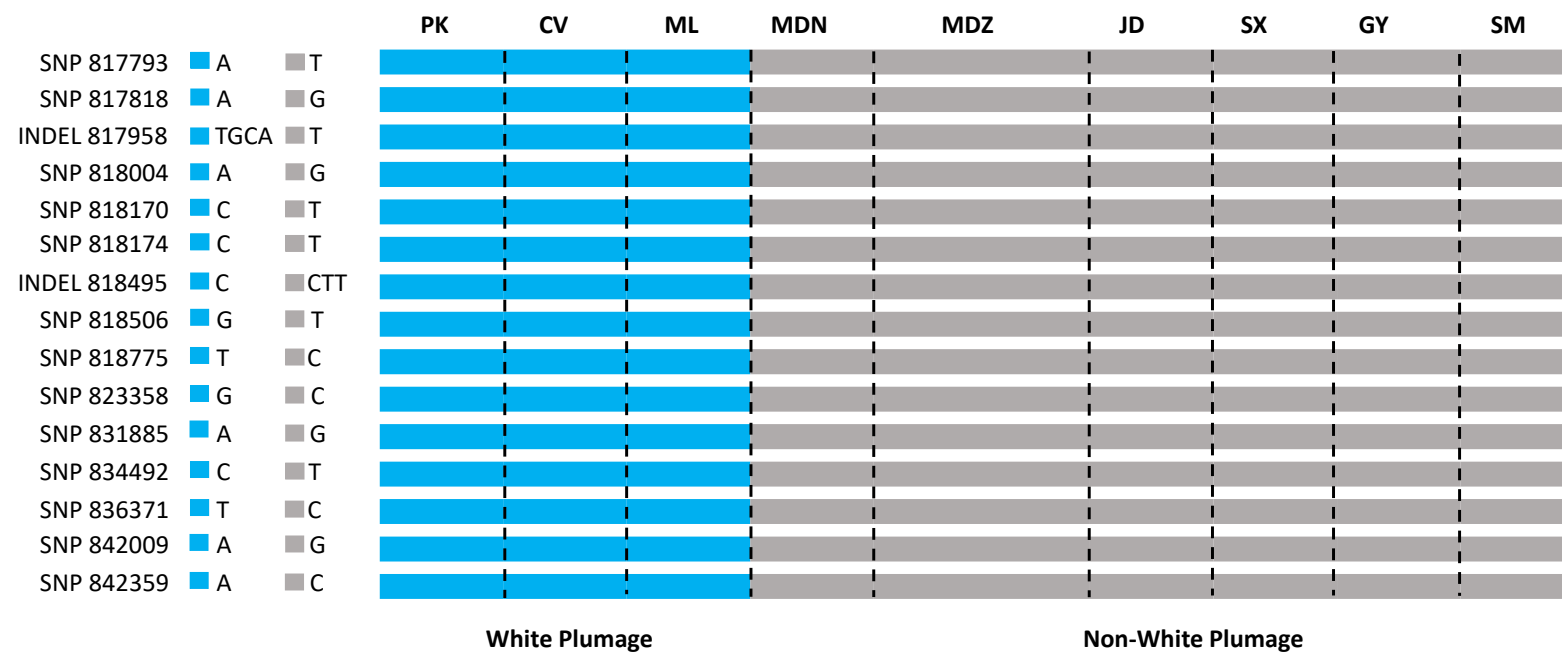

Figure 4

[Click here to download Figure fig. 4.pdf](#)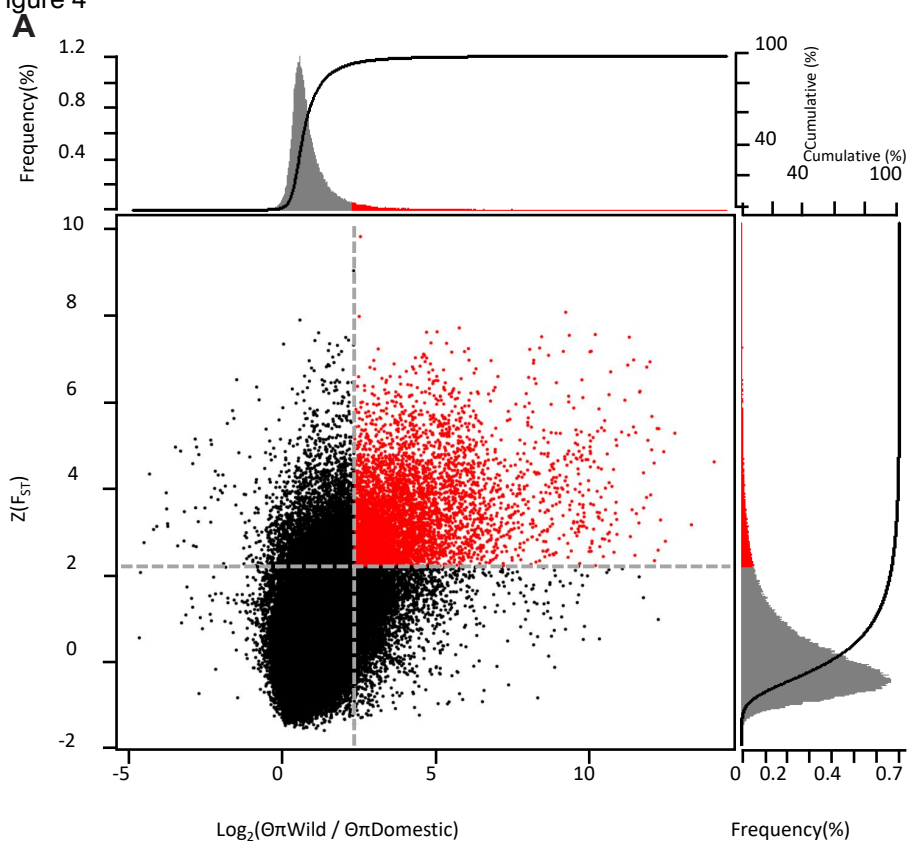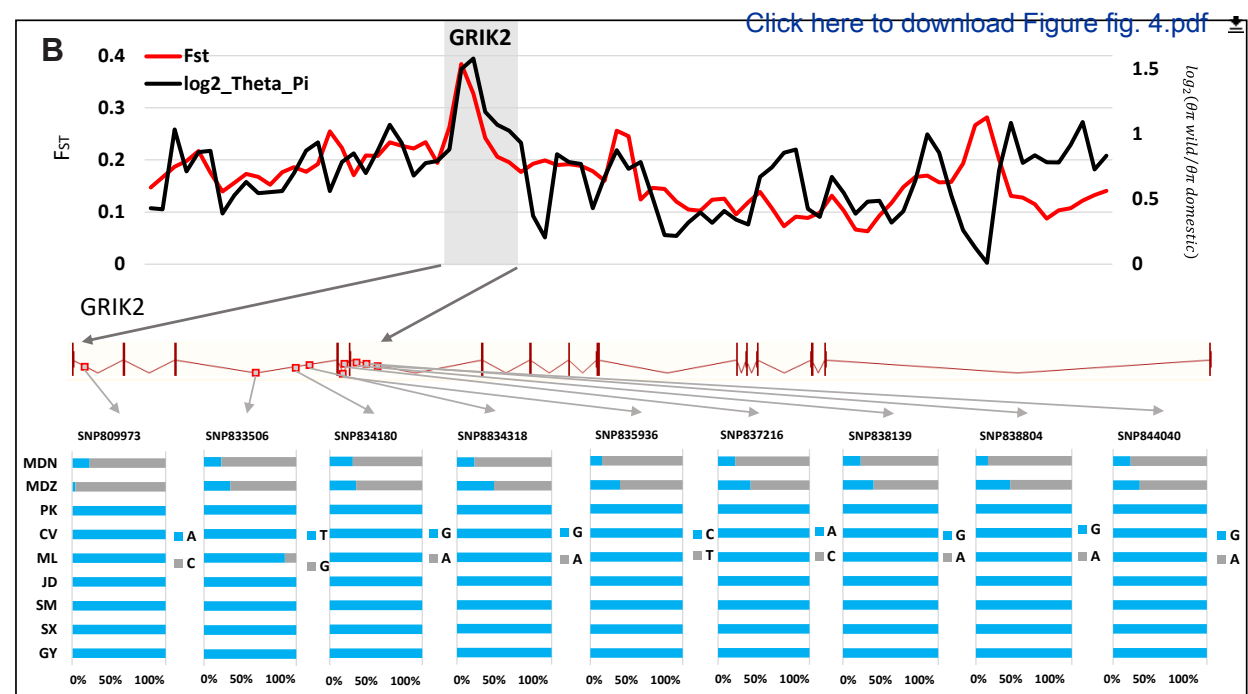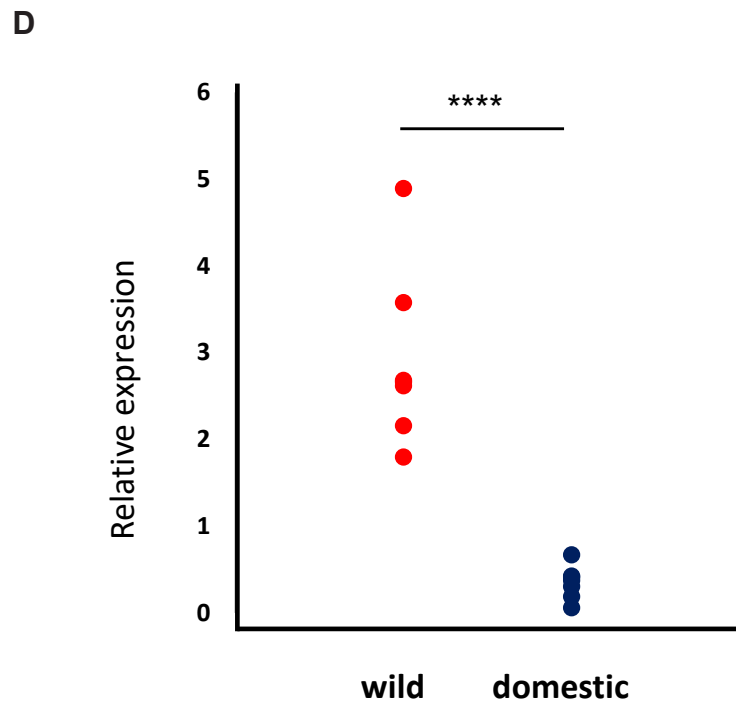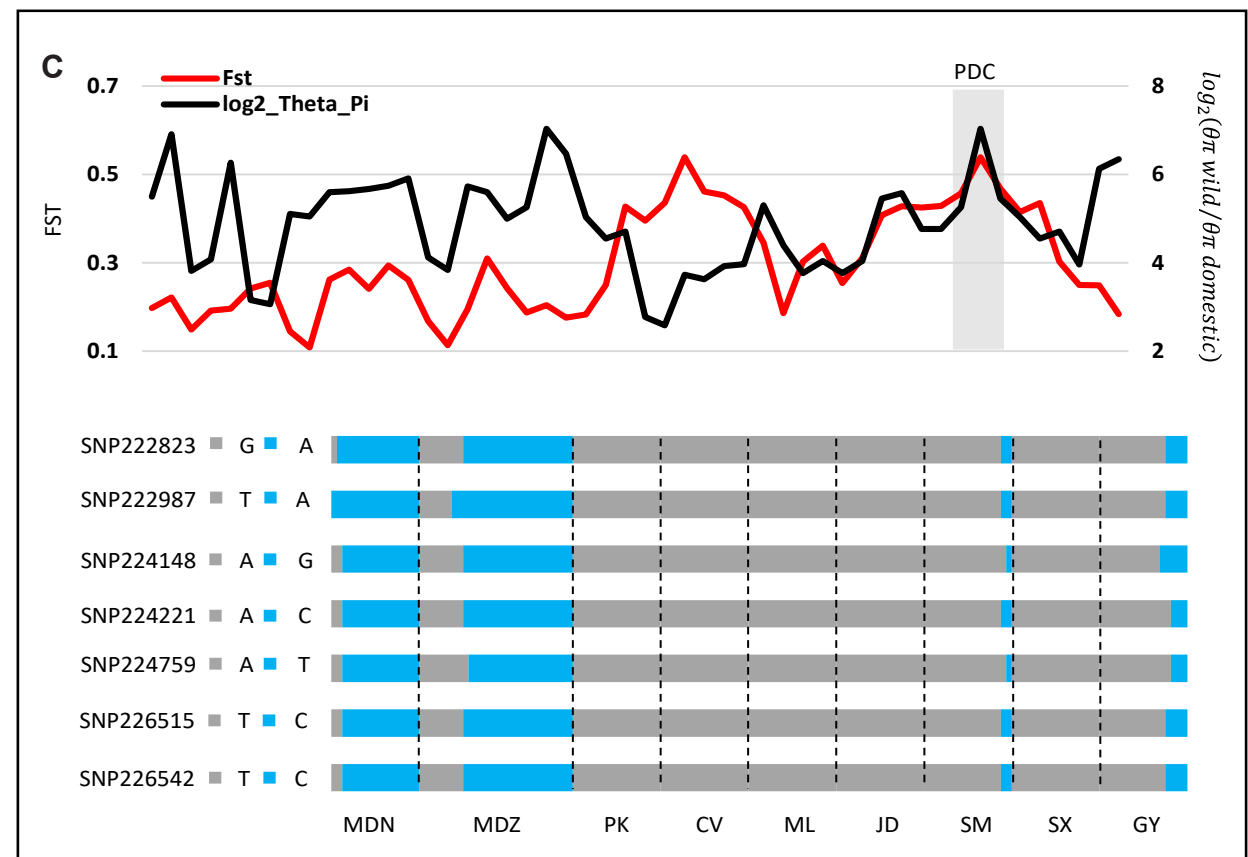

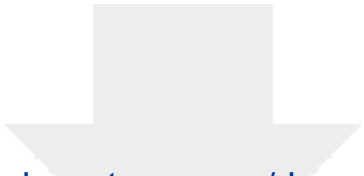

Click here to access/download  
**Supplementary Material**  
supplemental Figure S1.pdf



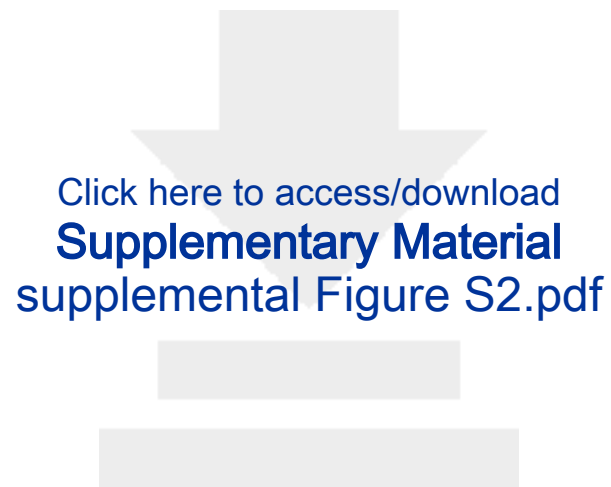

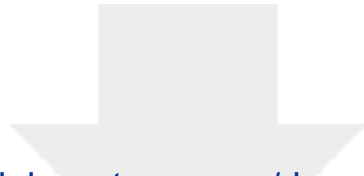

Click here to access/download  
**Supplementary Material**  
Supplemental Figure S3.pdf

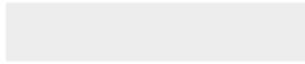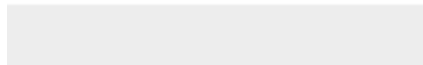



Click here to access/download  
**Supplementary Material**  
Supplemental Figure S4.pdf

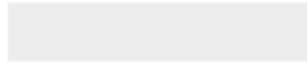



Click here to access/download  
**Supplementary Material**  
Supplemental Figure S5.pdf

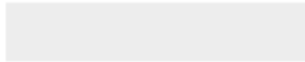





Click here to access/download  
**Supplementary Material**  
Supplemental Figure S6.pdf

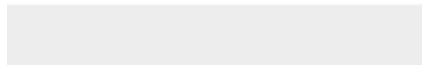



Click here to access/download  
**Supplementary Material**  
Supplementary Tables.xlsx



Supplement: giy027_giga-d-17-00301_revision_2.pdf [file giy027_giga-d-17-00301_revision_2.pdf]
