# Supplementary material for: Whole-genome resequencing reveals signatures of selection and timing of duck domestication
Source: PubMed Central journal article supplement (PMC6007426; doi:10.1093/gigascience/giy027), 2018-04-09
Supplement: giy027_giga-d-17-00301_revision_1.pdf [file giy027_giga-d-17-00301_revision_1.pdf]

## Whole-genome resequencing reveals signatures of selection and timing of duck domestication

--Manuscript Draft--

|                                                      |                                                                                                                                                                                                                                                                                                                                                                                                                                                                                                                                                                                                                                                                                                                                                                                                                                                                                                                                                                                                                                                                                                                                     |                   |
|------------------------------------------------------|-------------------------------------------------------------------------------------------------------------------------------------------------------------------------------------------------------------------------------------------------------------------------------------------------------------------------------------------------------------------------------------------------------------------------------------------------------------------------------------------------------------------------------------------------------------------------------------------------------------------------------------------------------------------------------------------------------------------------------------------------------------------------------------------------------------------------------------------------------------------------------------------------------------------------------------------------------------------------------------------------------------------------------------------------------------------------------------------------------------------------------------|-------------------|
| <b>Manuscript Number:</b>                            | GIGA-D-17-00301R1                                                                                                                                                                                                                                                                                                                                                                                                                                                                                                                                                                                                                                                                                                                                                                                                                                                                                                                                                                                                                                                                                                                   |                   |
| <b>Full Title:</b>                                   | Whole-genome resequencing reveals signatures of selection and timing of duck domestication                                                                                                                                                                                                                                                                                                                                                                                                                                                                                                                                                                                                                                                                                                                                                                                                                                                                                                                                                                                                                                          |                   |
| <b>Article Type:</b>                                 | Research                                                                                                                                                                                                                                                                                                                                                                                                                                                                                                                                                                                                                                                                                                                                                                                                                                                                                                                                                                                                                                                                                                                            |                   |
| <b>Funding Information:</b>                          | Beijing Innovation Team of the Modern Agro-industry Technology Research System (BAIC04-2017)                                                                                                                                                                                                                                                                                                                                                                                                                                                                                                                                                                                                                                                                                                                                                                                                                                                                                                                                                                                                                                        | Prof. Lujiang Qu  |
|                                                      | European Research Council (680951)                                                                                                                                                                                                                                                                                                                                                                                                                                                                                                                                                                                                                                                                                                                                                                                                                                                                                                                                                                                                                                                                                                  | Dr. Judith E Mank |
|                                                      | Wolfson Merit Award                                                                                                                                                                                                                                                                                                                                                                                                                                                                                                                                                                                                                                                                                                                                                                                                                                                                                                                                                                                                                                                                                                                 | Dr. Judith E Mank |
| <b>Abstract:</b>                                     | <p>Background: The genetic basis of animal domestication remains poorly understood, and systems with substantial phenotypic differences between wild and domestic populations are useful for elucidating the genetic basis of adaptation to new environments as well as the genetic basis of rapid phenotypic change. Here, we sequenced the whole genome of 78 individual ducks, from two wild and seven domesticated populations, with an average sequencing depth of 6.42X per individual.</p> <p>Results: Our population and demographic analyses indicate a complex history of domestication, with early selection for separate meat and egg lineages. Genomic comparison of wild to domesticated populations suggest that genes affecting brain and neuronal development have undergone strong positive selection during domestication. Our FST analysis also indicates that the duck white plumage is the result of selection at the melanogenesis associated transcription factor locus.</p> <p>Conclusions: Our results advance the understanding of animal domestication and selection for complex phenotypic traits.</p> |                   |
| <b>Corresponding Author:</b>                         | Lujiang Qu, Ph.D.<br>China Agricultural University<br>Beijing, CHINA                                                                                                                                                                                                                                                                                                                                                                                                                                                                                                                                                                                                                                                                                                                                                                                                                                                                                                                                                                                                                                                                |                   |
| <b>Corresponding Author Secondary Information:</b>   |                                                                                                                                                                                                                                                                                                                                                                                                                                                                                                                                                                                                                                                                                                                                                                                                                                                                                                                                                                                                                                                                                                                                     |                   |
| <b>Corresponding Author's Institution:</b>           | China Agricultural University                                                                                                                                                                                                                                                                                                                                                                                                                                                                                                                                                                                                                                                                                                                                                                                                                                                                                                                                                                                                                                                                                                       |                   |
| <b>Corresponding Author's Secondary Institution:</b> |                                                                                                                                                                                                                                                                                                                                                                                                                                                                                                                                                                                                                                                                                                                                                                                                                                                                                                                                                                                                                                                                                                                                     |                   |
| <b>First Author:</b>                                 | Zebin Zhang                                                                                                                                                                                                                                                                                                                                                                                                                                                                                                                                                                                                                                                                                                                                                                                                                                                                                                                                                                                                                                                                                                                         |                   |
| <b>First Author Secondary Information:</b>           |                                                                                                                                                                                                                                                                                                                                                                                                                                                                                                                                                                                                                                                                                                                                                                                                                                                                                                                                                                                                                                                                                                                                     |                   |
| <b>Order of Authors:</b>                             | Zebin Zhang                                                                                                                                                                                                                                                                                                                                                                                                                                                                                                                                                                                                                                                                                                                                                                                                                                                                                                                                                                                                                                                                                                                         |                   |
|                                                      | Yaxiong Jia                                                                                                                                                                                                                                                                                                                                                                                                                                                                                                                                                                                                                                                                                                                                                                                                                                                                                                                                                                                                                                                                                                                         |                   |
|                                                      | Pedro Almeida                                                                                                                                                                                                                                                                                                                                                                                                                                                                                                                                                                                                                                                                                                                                                                                                                                                                                                                                                                                                                                                                                                                       |                   |
|                                                      | Judith E Mank                                                                                                                                                                                                                                                                                                                                                                                                                                                                                                                                                                                                                                                                                                                                                                                                                                                                                                                                                                                                                                                                                                                       |                   |
|                                                      | Marcel van Tuinen                                                                                                                                                                                                                                                                                                                                                                                                                                                                                                                                                                                                                                                                                                                                                                                                                                                                                                                                                                                                                                                                                                                   |                   |
|                                                      | Qiong Wang                                                                                                                                                                                                                                                                                                                                                                                                                                                                                                                                                                                                                                                                                                                                                                                                                                                                                                                                                                                                                                                                                                                          |                   |
|                                                      | Zhihua Jiang                                                                                                                                                                                                                                                                                                                                                                                                                                                                                                                                                                                                                                                                                                                                                                                                                                                                                                                                                                                                                                                                                                                        |                   |
|                                                      | Yu Chen                                                                                                                                                                                                                                                                                                                                                                                                                                                                                                                                                                                                                                                                                                                                                                                                                                                                                                                                                                                                                                                                                                                             |                   |
|                                                      | Kai Zhan                                                                                                                                                                                                                                                                                                                                                                                                                                                                                                                                                                                                                                                                                                                                                                                                                                                                                                                                                                                                                                                                                                                            |                   |
|                                                      | Shuisheng Hou                                                                                                                                                                                                                                                                                                                                                                                                                                                                                                                                                                                                                                                                                                                                                                                                                                                                                                                                                                                                                                                                                                                       |                   |

|                                                |                                                                                                                                                                                                                                                                                                                                                                                                                                                                                                                                                                                                                                                                                                                                                                                                                                                                                                                                                                                                                                                                                                                                                                                                                                                                                                                                                                                                                                                                                                                                                                                                                                                                                                                                                                                                                                                                                                                                                                                                                                                                                                                                                                                                                                                                                                                                                                                                                                                                                                                                                                                                                                                                                                                                                                                                                                                                                   |
|------------------------------------------------|-----------------------------------------------------------------------------------------------------------------------------------------------------------------------------------------------------------------------------------------------------------------------------------------------------------------------------------------------------------------------------------------------------------------------------------------------------------------------------------------------------------------------------------------------------------------------------------------------------------------------------------------------------------------------------------------------------------------------------------------------------------------------------------------------------------------------------------------------------------------------------------------------------------------------------------------------------------------------------------------------------------------------------------------------------------------------------------------------------------------------------------------------------------------------------------------------------------------------------------------------------------------------------------------------------------------------------------------------------------------------------------------------------------------------------------------------------------------------------------------------------------------------------------------------------------------------------------------------------------------------------------------------------------------------------------------------------------------------------------------------------------------------------------------------------------------------------------------------------------------------------------------------------------------------------------------------------------------------------------------------------------------------------------------------------------------------------------------------------------------------------------------------------------------------------------------------------------------------------------------------------------------------------------------------------------------------------------------------------------------------------------------------------------------------------------------------------------------------------------------------------------------------------------------------------------------------------------------------------------------------------------------------------------------------------------------------------------------------------------------------------------------------------------------------------------------------------------------------------------------------------------|
|                                                | Zhengkui Zhou                                                                                                                                                                                                                                                                                                                                                                                                                                                                                                                                                                                                                                                                                                                                                                                                                                                                                                                                                                                                                                                                                                                                                                                                                                                                                                                                                                                                                                                                                                                                                                                                                                                                                                                                                                                                                                                                                                                                                                                                                                                                                                                                                                                                                                                                                                                                                                                                                                                                                                                                                                                                                                                                                                                                                                                                                                                                     |
|                                                | Huifang Li                                                                                                                                                                                                                                                                                                                                                                                                                                                                                                                                                                                                                                                                                                                                                                                                                                                                                                                                                                                                                                                                                                                                                                                                                                                                                                                                                                                                                                                                                                                                                                                                                                                                                                                                                                                                                                                                                                                                                                                                                                                                                                                                                                                                                                                                                                                                                                                                                                                                                                                                                                                                                                                                                                                                                                                                                                                                        |
|                                                | Fangxi Yang                                                                                                                                                                                                                                                                                                                                                                                                                                                                                                                                                                                                                                                                                                                                                                                                                                                                                                                                                                                                                                                                                                                                                                                                                                                                                                                                                                                                                                                                                                                                                                                                                                                                                                                                                                                                                                                                                                                                                                                                                                                                                                                                                                                                                                                                                                                                                                                                                                                                                                                                                                                                                                                                                                                                                                                                                                                                       |
|                                                | Yong He                                                                                                                                                                                                                                                                                                                                                                                                                                                                                                                                                                                                                                                                                                                                                                                                                                                                                                                                                                                                                                                                                                                                                                                                                                                                                                                                                                                                                                                                                                                                                                                                                                                                                                                                                                                                                                                                                                                                                                                                                                                                                                                                                                                                                                                                                                                                                                                                                                                                                                                                                                                                                                                                                                                                                                                                                                                                           |
|                                                | Zhonghua Ning                                                                                                                                                                                                                                                                                                                                                                                                                                                                                                                                                                                                                                                                                                                                                                                                                                                                                                                                                                                                                                                                                                                                                                                                                                                                                                                                                                                                                                                                                                                                                                                                                                                                                                                                                                                                                                                                                                                                                                                                                                                                                                                                                                                                                                                                                                                                                                                                                                                                                                                                                                                                                                                                                                                                                                                                                                                                     |
|                                                | Ning Yang                                                                                                                                                                                                                                                                                                                                                                                                                                                                                                                                                                                                                                                                                                                                                                                                                                                                                                                                                                                                                                                                                                                                                                                                                                                                                                                                                                                                                                                                                                                                                                                                                                                                                                                                                                                                                                                                                                                                                                                                                                                                                                                                                                                                                                                                                                                                                                                                                                                                                                                                                                                                                                                                                                                                                                                                                                                                         |
|                                                | Lujiang Qu, Ph.D.                                                                                                                                                                                                                                                                                                                                                                                                                                                                                                                                                                                                                                                                                                                                                                                                                                                                                                                                                                                                                                                                                                                                                                                                                                                                                                                                                                                                                                                                                                                                                                                                                                                                                                                                                                                                                                                                                                                                                                                                                                                                                                                                                                                                                                                                                                                                                                                                                                                                                                                                                                                                                                                                                                                                                                                                                                                                 |
| <b>Order of Authors Secondary Information:</b> |                                                                                                                                                                                                                                                                                                                                                                                                                                                                                                                                                                                                                                                                                                                                                                                                                                                                                                                                                                                                                                                                                                                                                                                                                                                                                                                                                                                                                                                                                                                                                                                                                                                                                                                                                                                                                                                                                                                                                                                                                                                                                                                                                                                                                                                                                                                                                                                                                                                                                                                                                                                                                                                                                                                                                                                                                                                                                   |
| <b>Response to Reviewers:</b>                  | <p>Dear Dr Zauner,</p> <p>Many thanks for your positive comments about our manuscript, "Whole-genome resequencing reveals signatures of selection and timing of duck domestication" (manuscript number GIGA-D-17-00301). We also thank the reviewers for their thoughtful and constructive suggestions. We have addressed all these comments, detailed below, in our revised manuscript, which we hope is now suitable for publication in GigaScience.</p> <p>Sincerely,<br/>Lujiang Qu, Ph.D., on behalf of all co-authors.<br/>Email: quluj@163.com<br/>Department of Animal Genetics and Breeding, College of Animal Science and Technology, China Agricultural University, Beijing 100193, China</p> <p>GIGA-D-17-00301<br/>Whole-genome resequencing reveals signatures of selection and timing of duck domestication<br/>Zebin Zhang; Yaxiong Jia; Pedro Almeida; Judith E Mank; Marcel van Tuinen; Qiong Wang; Zihua Jiang; Yu Chen; Kai Zhan; Shuisheng Hou; Zhengkui Zhou; Huifang Li; Fangxi Yang; Yong He; Lujiang Qu, Ph.D.<br/>GigaScience</p> <p>Dear Prof. Qu,</p> <p>Your manuscript "Whole-genome resequencing reveals signatures of selection and timing of duck domestication" (GIGA-D-17-00301) has been assessed by our reviewers. Although it is of interest, we are unable to consider it for publication in its current form. The reviewers have raised a number of points which we believe would improve the manuscript and may allow a revised version to be published in GigaScience.</p> <p>Their reports are below.</p> <p>Comment: All reviewers, but reviewer 2 in particular, provide some suggestions how the submission can be improved, for example by explaining the hypotheses more clearly in the introduction, and also by some additional analyses that may make the paper even stronger.</p> <p>Reply: Many thanks for your comments. We have more clearly articulated our hypotheses in introduction section according to your and reviewer2's suggestion, please see lines 75-79. Meanwhile, we have done the additional analyses according to your and reviewer2's suggestion, such as FRAPPE analyses by K=4, PSMC and <math>\delta a\delta i</math> analyses based on chicken mutation rate, global FST between each duck population, and FST recalculated by BayeScan, please see the specific reply to reviewer2.</p> <p>Comment: An absolutely crucial point for publication in GigaScience is the remark #6 by reviewer 1, regarding sharing of data, code and protocols. GigaScience embraces the FAIR principles (<a href="https://www.force11.org/group/fairgroup/fairprinciples">https://www.force11.org/group/fairgroup/fairprinciples</a>) and we ask our authors to document their work according to these principles, to allow full reproducibility and maximum reuse potential of the data, protocols and scripts.</p> |

Please include supporting data such as custom scripts, full population genetic statistics and location of sweeps, any software output files, alignments, phylogenetic tree files etc.

Reply: Thank you for this suggestion. The 78 ducks used in our whole genome resequencing analysis and the 14 ducks used in RNA-seq analysis have been submitted to NCBI BioProject (<http://www.ncbi.nlm.nih.gov/bioproject>) under accession numbers PRJNA419832 and PRJNA419583, respectively. The unassembled sequencing reads of 78 ducks and RNA-seq reads of 14 ducks have been deposited in NCBI Sequence Read Archive (SRA: <http://www.ncbi.nlm.nih.gov/sra>) under accession numbers SRP125660 and SRP125529, respectively.

VCF files of SNPs and INDELS, as well as other supporting data, have been submitted to GigaDB as suggested. Please check the GigaDB servers.

Meanwhile, we also replied to reviewer 1 and have added these description to our current manuscript, please see lines 618-628.

To share your supporting data and scripts, our data curators will be able to help you to make them available via our data repository GigaDB. You can contact them via email: [database@gigasciencejournal.com](mailto:database@gigasciencejournal.com).

We are encouraging our submitters to make use of protocols.io , if you provide your methods (both wet-lab and dry-lab) in the SOP tab on the data spreadsheet we can import those into protocols.io on your behalf.

To share your raw sequencing data, please note that the BIG data repository is not part of the International Nucleotide Sequence Database Collaboration. Please choose a database that is an INSDC member (<http://www.insdc.org/>) and report accession numbers of the INSDC database in the manuscript.

If you are able to fully address points of our reviewers, we would encourage you to submit a revised manuscript to GigaScience. Once you have made the necessary corrections, please submit online at:

<http://giga.edmgr.com/>

If you have forgotten your username or password please use the "Send Login Details" link to get your login information. For security reasons, your password will be reset.

Please include a point-by-point within the 'Response to Reviewers' box in the submission system.

Please ensure you describe additional experiments that were carried out and include a detailed rebuttal of any criticisms or requested revisions that you disagreed with. Please also ensure that your revised manuscript conforms to the journal style, which can be found in the Instructions for Authors on the journal homepage.

The due date for submitting the revised version of your article is 20 Mar 2018.

I look forward to receiving your revised manuscript soon.

Best wishes,

Hans Zauner  
GigaScience  
[www.gigasciencejournal.com](http://www.gigasciencejournal.com)

Reviewer reports:

Reviewer #1:

This paper reports sequencing, population history inferences, and selective sweep mapping in ducks using whole genome sequence data of multiple populations.

This is a good paper. It presents a large-scale population genomic dataset of ducks, uses standard methods that seem appropriate to the task, and it is well written.

Despite this, I have a few criticisms and questions:

Comment: 1. The paper repeatedly states that this is the first time MITF is associated with colour in the duck. This seems not to be entirely true (see Li et al 2012, <http://journals.plos.org/plosone/article?id=10.1371/journal.pone.0036592>, and Sultana et al 2017, <https://www.ncbi.nlm.nih.gov/pubmed/28823136>, but maybe the latter was not published when the manuscript was written). This study presents a whole-genome scan, which should provide stronger evidence than candidate gene associations. Comparing to other papers would be interesting. Can that help filter the candidate variants?

Reply: Thank you very much for your positive comments and for the two very helpful citations. Li et al (2012) identified that M isoform of MITF as expressed in black feather ducks, rather than white feather ducks or other colorful ducks. Sultana et al (2017) showed several SNPs and INDEL of MITF with different allele frequency in black and white ducks (table 2 - 5), but did not distinguish the correlation of MITF to white or other feather colors.

Due linkage effects, it is notoriously difficult to determine which variant is the real causative mutation of white plumage. Thus, we used the strictest variant filter criteria, namely those with fixed genotype differences in white and non-white ducks. We would very much like to implement the reviewer's suggestion of using the variants identified in these two previous studies, however the variants reported in Li et al (2012) and Sultana et al (2017) do not in fact pass our strict filter criteria.

We have however added these citations to our manuscript and revised the discussion accordingly (please see line 390). Most importantly, in order to distinguish our result from these previous studies, we revised our statement to say that "Our results show that white plumage in the duck is completely associated with selection at the MITF locus" in our current manuscript, please see line 42 and line 246-247.

Comment: 2. It would be useful to see the population history results put more into context. In the light of what is known about duck breed history, is it reasonable that meat and egg type ducks split 2100 years ago? In the Discussion, this number is said to be "compatible with previous written records from 500 BC". The reference is to a book with no page numbers given. Would it be possible to be more specific? Given convergence problems with alternative models, how sure are you that the balance between migration and split time is right? I will admit that I am not really the person to evaluate the pairwise sequential Markov coalescent and  $\delta a \delta i$  results.

Reply: Many thanks for your comments. As we state in the manuscript, written records note domestic ducks in China as early as 500 BC. Due to the lack of archaeological evidence, we must focus on textual evidence, which indicates duck domestication occurred approximately 2,000 - 2,500 years ago. We have added these historical references regarding duck domestication to our current manuscript, please see lines 63-71, and have added page numbers to the book citations, and below, please see lines 697-700. Meanwhile, we also reran the PSMC and  $\delta a \delta i$  analyses based on the mutation rate estimate in chicken ( $1.91 \times 10^{-9}$  per base per generation, Nam et al. 2010). The chicken is phylogenetically closer to the duck than zebra finch, the source of our previous mutation rate estimate (Jarvis et al. 2014), however the mutation rate estimates in both chicken and duck are qualitatively similar. As a result, our results are similar, and indicate duck domestication occurred 2228 (441) years ago. We revised the PSMC and  $\delta a \delta i$  results of our current manuscript, please see Fig 2D, Table 1, and lines 204-219, 546-548.

It is true that the recent divergent time and the high level of diversity in both the domestic and wild populations makes it difficult to differentiate recent admixture from incomplete lineage sorting, however our genetic analysis is largely consistent with these written records, and does not indicate domestication much earlier than this time.

Luff R. 2000. Ducks. In Cambridge World History of Food, ed. KF Kiple, KC Ornelas, pp. 517–24. Cambridge, UK: Cambridge University Press



Jarvis, E. D., et al. (2014). "Whole-genome analyses resolve early branches in the tree of life of modern birds." *Science* 346(6215): 1320-1331.

Nam, K., et al. (2010). "Molecular evolution of genes in avian genomes." *Genome Biol* 11(6): R68.

Comment: 3. It is nice to see the high overlap between SNPs detected here and those in dbSNP. How many of the indels were already in databases? Was PCR validation only for SNPs? Given that indel detection is harder than SNP detection, are you convinced that the MITF indels are real?

Reply: Thank you for your comments. Initially, we validated our INDELS in dbINDEL, following a similar protocol to our SNP validation. However, there has been less focus on INDEL annotation in the database, which contains nearly 70 fold fewer INDELS than we detected. As we used extremely strict filter criteria for INDELS as well as SNPs, we suggest that the difference in variation is due to our greater focus on INDEL annotation please lines 497 – 500.

For the two MITF INDELS discussed, we used diagnostic PCR combined with Sanger sequencing to validate these sites in the 78 white and non-white ducks, as well as the first three SNPs (SNP817793, SNP817818, and SNP818004). The Sanger sequencing results of the three SNPs and INDEL817958 completely match our NGS analysis, please see figure below and supplemental figure S5 in our current manuscript. For INDEL818495, we were unable to identify a suitable PCR primer. We have added this to our revised manuscript, please see lines 247-253.

Comment: 4. A protocol for PCR validation seems to be missing (L440-442). It is hard to interpret the 100% accuracy in SNP validation when it is not clear how validation was performed or the accuracy evaluated.

Reply: Apologies, and many thanks for pointing this out. The SNP validation was performed by diagnostic PCR combined with Sanger sequencing method. We have added this description to our revised manuscript, please see lines 510-513.

Comment: 5. The paper is well written, but the GigaScience author guidelines prescribe a somewhat different structure. It specifies an abstract divided into Background, Results, and Conclusions. The Data Description section is missing and other sections are have different names.

Reply: Thank you very much for this helpful suggestion. We had separated the abstract section accordingly, please see lines 30-44. We have also added the Data Description section, please see lines 86-109. We also renamed the Results as Analyses, please see line 111, and revised the Availability of Supporting Data and Materials (lines 618-628), and the Declarations section (lines 632, 633, and 641).

Comment:6. It seems to me that the data and source code availability may not be in line with the journal policies. I am not certain how to interpret the policies, but the editors will know better. Overall, the methods are described in text, but protocols and scripts are not provided. The raw sequence data is published in a repository, but little else, not even the full population genetic statistics or location of sweeps, as far as I can tell.

Reply: Apologies for our previous raw data and source code status. The data from the 78 ducks used in whole genome resequencing and the 14 ducks used in RNA-seq analysis have been submitted to NCBI BioProject (<http://www.ncbi.nlm.nih.gov/bioproject>) under accession numbers PRJNA419832 and PRJNA419583, respectively. The unasssembled sequencing reads of 78 ducks and RNA-seq reads of 14 ducks have been deposited in the NCBI Sequence Read Archive (SRA: <http://www.ncbi.nlm.nih.gov/sra>) under accession numbers SRP125660 and SRP125529, respectively. VCF files of SNPs and INDELS, as well as other supporting data, have been submitted to GigaDB as you suggest, please check the GigaDB servers. And, we add these description to our current manuscript, please see lines 618-628.

Minor comments

Comment: Line 35: The important numbers are the number of individuals sampled and the coverage per individual. Average coverage per breed seems less interesting.

Reply: Many thanks for your comment, we had revised this to per individual coverage information, please see line 36.

Comment: Lines 97-101: What do the average numbers of variants detected per individual mean? Are they variants that differ from reference genome, heterozygous variants, or something else?

Reply: Many thanks for your questions. The number of variants between the reference genome and each individual are different, especially in wild mallard and domesticated ducks, (please see supplementary table S2). The average value is the mean variant count of an individual, which includes both heterozygous variants and homozygous variants.

Comment: Lines 243-250: Which GO terms were these, and how were they chosen? It seems odd to me to first select a subset of genes based on GO and then perform enrichment analysis on that set. Will this not bias the analysis?

Reply: Apologies for any confusion. In fact, we observed 292 genes in the top 5% Fst regions, please see supplementary table S5. Our enrichment analysis is based on these 292 genes, and we identified a subset of GO terms for further analyses based on significant GO term P-values, please see supplementary table S7. Moreover, we add the full GO terms to our current manuscript, please see supplementary table S6.

Comment: Lines 393-400: Is there a reason for this mix of sequencing coverage?

Reply: We aimed to sequence each individual at 5X coverage. Additionally, in order to reduce the false negative rate of variants due to our strict filter criteria, we randomly selected one individual from each population for 10X coverage.

Comment: Lines 381-384: It is not clear where the ducks came from. How were they obtained?

Reply: Many thanks for your questions. PK and ML ducks were obtained from Institute of Pekin Duck with the help of Mr. Fangxi Yang, please see author information section, lines 5 and 25. CV ducks were obtained from Cherry Valley farms Co. Ltd with the help of Dr. Yong He, please see lines 5 and 26. The other domesticated ducks were obtained from different duck breeding farms under the help of Dr. Huifang Li, please see lines 5 and 23.

Comment: Line 506: What tool was used for Fst? Also VCFtools?

Reply: Thanks you very much for your questions. The Fst was calculated by the formula described by Weir BS (1984) under our custom perl script. Our custom perl script have been submitted to GigaDB database.

Weir, B. S. and C. C. Cockerham (1984). "Estimating F-Statistics for the Analysis of Population-Structure." *Evolution* 38(6): 1358-1370.

Comment: Figure 1b: The circos plot in Figure 1 looks impressive, but is impossible to read. What is it supposed to show?

Reply: Apologies for any problems with our figures. The complicated circos plot is the result of the many scaffolds (78,488) in the current duck reference genome. We have removed the circos plot from our current manuscript, please see figure 1, and line 125-127.

Comment: Throughout methods: Version numbers are missing for some softwares.

Reply: Apologies for this. We have added all this information to our current manuscript, such as NGS QC Toolkit v2.3.3 (line 480), SnpEff v4.0 (line 501), GCTA v1.25 (line

520), MUSCLE v3.8 (line 532), PSMC v0.6.5 (line 541), *paai* v1.7 (line 550), VCFtools v0.1.13 (line 592), and edgeR v3.6 (line 617).

Reviewer #2:

Zhang et al. sequenced whole genomes of 78 individuals of domesticated and wild mallard populations. The authors find a complex history of domestication, with particular artificial selection of meat and egg production in domesticated lineages. Further, outlier analyses demonstrate that white plumage was the result of selection of MITF transcriptional factors. I believe that the authors are tackling an important question regarding variation between domesticates and wild populations, and with an extensive genomic dataset. However, I think the authors fall short in introducing the subject and discussing their results. Moreover, the manuscript requires editing prior to publication, particularly the introduction.

Comment: Introduction.

The introduction requires extensive editing. I would also encourage the authors to add another sentence as the relevance (the why) of looking for outliers between domesticated and wild stocks. What exactly are you trying to learn? Instead of results, I would like to see hypotheses regarding what the authors may expect when comparing the genomes of domesticated and wild populations.

Reply: Many thanks for your comments. The most important reason we identified outliers between wild and domesticated ducks was to identify putative sites associated with the genetic basis of phenotypic differences between wild and domestic populations. We have added this explanation to our manuscript, and have also extensively revised our introduction section according to your suggestions, please see lines 51-85.

We had two primary hypotheses regarding duck domestication given the deep divergence between meat and egg breeds. Were ducks domesticated once from wild mallards and subsequently selected for separate egg and meat traits, or were egg and meat populations domesticated in two independent events. We have added the hypotheses of duck domestication scenarios to introduction section, please see lines 75-79.

Comment: The whole first paragraph requires editing.

For example -- Line 50-52: Suggest change sentence to: "Mallards (*Anas platyrhynchos*) are the world's most widely distributed and agriculturally important waterfowl species, and are especially of economic importance in Asia [1]."

Reply: Many thanks for this suggestion. We had revised the sentence accordingly, please see lines 63-64. And we have also extensively revised the first paragraph as suggested, please see lines 52-71.

Comment: Results

1. Line 79 - is this 535 billion mappable reads per sample or across samples?

Reply: Apologies for any confusion. The 535 billion is the total mapped reads across samples. We have added this explanation to our revised manuscript, please see line 117.

Comment: 2. Lines 115-121- how did the authors pick the optimum K in FRAPPE analyses? Did the authors explore additional K values? Were separate analyses done within wild and domesticated populations? Please explain.

Reply: Many thanks for your comments. We analyzed the population structure with K =2, 3 and 4 because there are four duck types across the nine duck populations, shown below, and explained in lines 161-165. When K=4, a clear division was found between egg type ducks (JD, SM, and SX) and dual-purpose type ducks (GY) (supplemental figure S6). The most important reason we focused on K=3 as the optimum value for further analysis is due to the results of both the phylogenetic and PCA analyses, which convergently showed the nine duck populations clustered into 3 major groups.

Comment: 2a. What do the authors make of domesticated admixture in wild populations? Is this hybridization, ancestry, a combination of both...? I would encourage the authors to explore this further as hybridization between domesticated and wild breeds is a serious concern for conservation of wild populations.

Reply: We agree with the reviewer that this is a very interesting area, and an area of great conservation importance. Unfortunately, given the recent domestication and high levels of diversity we observe, it is not in fact possible to accurately differentiate hybridization from incomplete lineage sorting with our current data, as complex models with these alternative scenarios failed to converge. We agree that this is an interesting area for further study, and have added this explanation to our current manuscript, please see lines 377-381.

Comment: 2b. The PCA analyses seem to suggest that there is structure within wild populations. Running a FRAPPE analyses on wild populations could help tease out whether they are 1 population and PCA analyses are just separating samples as there is so much variation.

Reply: Thank you very much for your comments. Of course, the PCA result showed there is a structure within wild populations, because the two wild populations come from two different provinces in China separated by nearly 2,000 km, (please see line 446). However, the PCA result also showed extensive overlap of these two wild populations, please see fig 2B. Additionally, our FRAPPE analyses were based on all 78 duck individuals rather than pooled population information. Thus, we apologize if we have missed something intended by the reviewer, but we think the structural analysis suggested with recover the same result as our current analysis.

Comment: 3. Lines 139-141 - consider revising the sentence into a more formal hypothesis. I would also like to see such hypotheses in the introduction.

Reply: Thank you so much for your kind suggestion. We had two primary hypotheses regarding duck domestication given the deep divergence between meat and egg breeds. Were ducks domesticated once from wild mallards and subsequently selected for separate egg and meat traits, or were egg and meat populations domesticated in two independent events. We have added the hypotheses of duck domestication scenarios to introduction section, please see lines 75-79.

Comment: 4. Outside of outlier tests by calculating FST, the authors should consider more formal testing of these putative outliers (e.g., BayeScan).

Reply: Thank you very much for this suggestion. We have recalculated our FST with BayeScan, and the results are statistically similar to our current analysis, based on Weir, B. S. (1984). Thus, we have kept our previous FST method in our revised manuscript, as this method is a classical and formal method for calculating FST, and has been widely implemented in many organisms, including rice (Meyer, R. S., et al. 2016), sheep (Yang, J., et al. 2016), dog (Gou, X., et al. 2014, Axelsson, E., et al. 2013), and pigeon (Shapiro, M. D., et al. 2013).

Weir, B. S. and C. C. Cockerham (1984). "Estimating F-Statistics for the Analysis of Population-Structure." *Evolution* 38(6): 1358-1370.  
Meyer, R. S., et al. (2016). "Domestication history and geographical adaptation inferred from a SNP map of African rice." *Nat Genet* 48(9): 1083-1088.  
Yang, J., et al. (2016). "Whole-Genome Sequencing of Native Sheep Provides Insights into Rapid Adaptations to Extreme Environments." *Mol Biol Evol* 33(10): 2576-2592.  
Gou, X., et al. (2014). "Whole-genome sequencing of six dog breeds from continuous altitudes reveals adaptation to high-altitude hypoxia." *Genome Res* 24(8): 1308-1315.  
Axelsson, E., et al. (2013). "The genomic signature of dog domestication reveals adaptation to a starch-rich diet." *Nature* 495(7441): 360-364.  
Shapiro, M. D., et al. (2013). "Genomic diversity and evolution of the head crest in the rock pigeon." *Science* 339(6123): 1063-1067.

Comment: 5. Although I like the idea of RNA-seq data here. I think that this is largely overlooked in the manuscript and may detract from the main (genome) focus. I would encourage the authors to consider taking the RNA-seq out or sufficiently expanding on methods, reasoning, etc. of the RNA-seq data.

Reply: Thank you so much for your suggestion. We respectfully suggest that the RNA-seq is a key component of our manuscript, as it represents functional phenotypic differentiation of wild mallards and domesticated ducks, and helps connect the genomic variation to phenotypic differences. We have revised the methods and reasoning of including this data RNA-seq as suggested, please see lines 324-328, 470-475, and 603-615.

Comment: 6. I would like to see global Fst estimates among breeds, wild locations

Reply: Many thanks for your comment. The global FST between were showed in below, and we also add this table to our current manuscript, please see lines 267-268, and supplemental table S4.

Comment: Discussion

I have no issues with the discussion and find it the best written. I think that a section on domesticate and wild hybridization may broaden the appeal of this paper.

Reply: Thanks for this suggestion. As we mentioned above, given the recent domestication and high levels of diversity we observe, it is not possible to accurately differentiate hybridization from incomplete lineage sorting with our current data, as complex models with these alternative scenarios failed to converge. We agree that this is an interesting area for further study, and have added material to the discussion as suggested, please see lines 377-381.

Comment: Methods

Please add additional information regarding FRAPPE analyses, K selection, etc.

Reply: Apologies for any omissions. We have added the method of FRAPPE analyses and K selection to our current manuscript, please see lines 523-529.

Comment: Figures

Figure 1: Consider re-moving statistical tests as these are presented in the results.

Reply: Thanks for your helpful comment. We have moved the statistical tests to the results section as suggested, please see lines 129-133, 144-147.

Reviewer #3:

Overall a very nice paper, detailed comments to the authors:

Comment: Line 35: 45X coverage is misleading since the individual coverage was much smaller, please make a clearer statement here

Reply: Thank you for this helpful suggestion. We have revised the population coverage information to individual information, please see line 36.

Comment: L40: Our FST analysis also indicates for the first time ...

Reply: Thanks for this suggestion. We have revised our manuscript according to your suggestion, please see lines 41-43.

Comment: L52: of particular economic importance ...

Reply: Many thanks for your comment. Done! Please see line 65.

Comment: L60-72: This is not introduction, but actually another summary, which I think is obsolete, a slightly more extended real introduction discussing background

prior knowledge, and aims of the study, would be preferred

Reply: Many thanks. We have moved this section of our previous version to Data Description according to GigaScience author guidelines and your suggestions, please lines 91-109. Meanwhile, we have revised our Introduction section, please see lines 52-85.

Comment: Figure 1B: this panel is nice, but not very informative, what exact information is retrieved from the graph?

Reply: Apologies for any problems with our figures. The complicated circos plot is the result of the many scaffolds (78,488) in the current duck reference genome. We have removed the circos plot from our current manuscript, please see Figure 1.

Comment: L95: The number of deletions was higher than the number of insertions in all nine populations

Reply: Done! Please see line 134.

Comment: L105: Move the sentence "Single base-pair INDELs were the predominant form, accounting for 38.63% of all detected INDELs (Supplemental Table S3)." before the sentence "Both the number of SNPs ..."

Reply: Thank you so much for your kind suggestion. We revised our manuscript accordingly, please see lines 142-143.

Comment: L111: ... clustered together, the three ...

Reply: Done! Please see line 155.

Comment: L117: Show figure for K=2?

Reply: Thanks for your question. Both K=2 and K=3 were showed in fig 2C, please see line 166.

Comment: L155: ... had the lowest Akaike Information Criteria (AIC) value, ...

Reply: Done! Please see lines 200-201.

Comment: L166: ... are lower than in wild mallards ...

Reply: Done! Please see line 213.

Comment: Table 1: is it possible to report standard errors or confidence intervals of the reported estimates?

Reply: Many thanks for your question. To answer the reviewer's question we added 95% confidence intervals to all estimates. We reanalyzed the demographic history of duck domestication based on mutation rates of both zebra finch and chicken. Using the mutation rate of zebra finch (Jarvis et al. 2014), the time of duck domestication is estimated at 2,128 (+- 421) years ago. With estimates of mutation rate from chicken (Nam et al. 2010), we estimate domestication 2,228 (+- 441) years ago. Considering the genetic relationship of duck to chicken is much closer than to zebra finch (Jarvis, E. D., et al. 2014), we revised the PSMC and  $\delta a\delta i$  results of our current manuscript, please see Fig 2D, Table 1, and lines 203-211, 547-549.

Comment: L197: ... white plumage phenotype suggesting a causative mutation. Our result indicates for the first time the duck white plumage associated with selection at ...

Reply: Done! Please see lines 245-247.

Comment: L213: of 10kb size.



Reply: Done! Please see line 267.

Comment: L224: "... scaffolds longer than 10-kb by 10-kb windows with 5-kb steps." This is not clear to me, please describe better.

Reply: Apologies for any confusion. In our study, both  $F_{ST}$  and  $\pi$  were calculated for each 10kb size window, with 5kb size steps. However, of the 78,488 scaffolds in the duck reference genome, there are many scaffolds < 10kb. These short scaffolds were removed, and we only calculated  $F_{ST}$  for scaffolds > 10kb. We have added this to our revised manuscript, please see lines 279-281.

Comment: L237 was shown

Reply: Done! Please see lines 293-294.

Comment: L240 level differs between domesticated and wild duck.

Reply: Done! Please see line 296.

Comment: L245 I understand that you limited the GO analysis to certain processes, what happened if you included other processes as well?

Reply: Many thanks for this suggestion. In this study, all 292 genes located in the 5%  $F_{ST}$  regions (supplementary table S5) were used for the GO analysis, resulting in a total of 57 GO enrichment terms, which have now all been added to our current manuscript, please see lines 300-301, and supplementary table S6. This high number of GO terms presents a hopelessly difficult and complicated analyses, therefore we selected a subset of GO terms for further analysis based on P-value (supplementary table S7) combined the phenotypic differences between wild mallard and domestic duck. We do agree with the reviewer that a more inclusive analysis would be preferable, but the large number of GO terms makes it impossible to obtain meaningful results.

Comment: L252 identified as being under positive selection

Reply: Corrected! Please see line 311.

Comment: L258 Is "neuronal genes" the right term?

Reply: Apologies for any confusion. "Neuronal genes" is not in fact a GO term, rather a simplification of "25 neuro-synapse-axon genes" in line 310. To be more understandable, we have removed this simplification in our revision, please see line 317.

Comment: L260 fatty acid

Reply: Apologies and corrected! Please see line 319.

Comment: L269 and no gene in breast muscle

Reply: Done! Please see line 329.

Comment: L273 The results suggest that the PDC gene is of substantial functional importance in phenotypic differentiation among wild and domestic ducks.

Reply: Many thanks. We have revised this sentence according to your suggestion, please see lines 333-335.

Comment: L289 catalogued 36.1M SNPs and 3.1M INDELS,

Reply: Corrected! Please see line 349.

Comment: L333 ... showed particularly strong signs of selective sweep s presumably associated with domestication.



|                                                                                                                                                                                                                                                                                                                                                                                                                                    |                                                                                                                                                                                                                                                                                                                                                                                                                                                                                                                                                                                                                                                                                                                                                                                                                                                                                                                                                                                                                                                                                                                                                                                                                                                                                                                                                                                                                                                                                                                                                                                                          |
|------------------------------------------------------------------------------------------------------------------------------------------------------------------------------------------------------------------------------------------------------------------------------------------------------------------------------------------------------------------------------------------------------------------------------------|----------------------------------------------------------------------------------------------------------------------------------------------------------------------------------------------------------------------------------------------------------------------------------------------------------------------------------------------------------------------------------------------------------------------------------------------------------------------------------------------------------------------------------------------------------------------------------------------------------------------------------------------------------------------------------------------------------------------------------------------------------------------------------------------------------------------------------------------------------------------------------------------------------------------------------------------------------------------------------------------------------------------------------------------------------------------------------------------------------------------------------------------------------------------------------------------------------------------------------------------------------------------------------------------------------------------------------------------------------------------------------------------------------------------------------------------------------------------------------------------------------------------------------------------------------------------------------------------------------|
|                                                                                                                                                                                                                                                                                                                                                                                                                                    | <p>Reply: We have corrected our manuscript according to your suggestion, please see lines 398-399.</p> <p>Comment: L340 brain and liver of domesticated ducks compared to ...</p> <p>Reply: Corrected! Please see line 405.</p> <p>Comment: L351 differential selection? Do you mean directional selection?</p> <p>Reply: Apologies for any confusion. We also revised our current manuscript, please see lines 416-418.</p> <p>Comment: L362 Taken together, our results show that duck domestication was a relatively recent and ...</p> <p>Reply: We have corrected our manuscript according to your suggestion, please see line 430.</p> <p>Comment: L440 From the 28,199,227 SNPs not confirmed by dbSNPs, 390 randomly chosen (?) nucleotide sites</p> <p>Reply: Many thanks for your question. Of course, all nucleotide sites were randomly selected. We have added this explain to our current manuscript, please see lines 510-513.</p> <p>Comment: L448 Principal Component Analysis (PCA), first by generating the genetic relationship matrix (GRM) from which the first 20 eigenvectors were extracted.</p> <p>Reply: We have corrected our manuscript according to your suggestion, please see line 520-522.</p> <p>--</p> <p>Please also take a moment to check our website at <a href="http://giga.edmgr.com/l.asp?i=25723&amp;l=YHKU51UQ">http://giga.edmgr.com/l.asp?i=25723&amp;l=YHKU51UQ</a> for any additional comments that were saved as attachments. Please note that as GigaScience has a policy of open peer review, you will be able to see the names of the reviewers.</p> |
| <b>Additional Information:</b>                                                                                                                                                                                                                                                                                                                                                                                                     |                                                                                                                                                                                                                                                                                                                                                                                                                                                                                                                                                                                                                                                                                                                                                                                                                                                                                                                                                                                                                                                                                                                                                                                                                                                                                                                                                                                                                                                                                                                                                                                                          |
| <b>Question</b>                                                                                                                                                                                                                                                                                                                                                                                                                    | <b>Response</b>                                                                                                                                                                                                                                                                                                                                                                                                                                                                                                                                                                                                                                                                                                                                                                                                                                                                                                                                                                                                                                                                                                                                                                                                                                                                                                                                                                                                                                                                                                                                                                                          |
| Are you submitting this manuscript to a special series or article collection?                                                                                                                                                                                                                                                                                                                                                      | No                                                                                                                                                                                                                                                                                                                                                                                                                                                                                                                                                                                                                                                                                                                                                                                                                                                                                                                                                                                                                                                                                                                                                                                                                                                                                                                                                                                                                                                                                                                                                                                                       |
| <p><b>Experimental design and statistics</b></p> <p>Full details of the experimental design and statistical methods used should be given in the Methods section, as detailed in our <a href="#">Minimum Standards Reporting Checklist</a>. Information essential to interpreting the data presented should be made available in the figure legends.</p> <p>Have you included all the information requested in your manuscript?</p> | Yes                                                                                                                                                                                                                                                                                                                                                                                                                                                                                                                                                                                                                                                                                                                                                                                                                                                                                                                                                                                                                                                                                                                                                                                                                                                                                                                                                                                                                                                                                                                                                                                                      |
| <p><b>Resources</b></p> <p>A description of all resources used,</p>                                                                                                                                                                                                                                                                                                                                                                | Yes                                                                                                                                                                                                                                                                                                                                                                                                                                                                                                                                                                                                                                                                                                                                                                                                                                                                                                                                                                                                                                                                                                                                                                                                                                                                                                                                                                                                                                                                                                                                                                                                      |

|                                                                                                                                                                                                                                                                                                                                                                                                                                                                                                                                                         |            |
|---------------------------------------------------------------------------------------------------------------------------------------------------------------------------------------------------------------------------------------------------------------------------------------------------------------------------------------------------------------------------------------------------------------------------------------------------------------------------------------------------------------------------------------------------------|------------|
| <p>including antibodies, cell lines, animals and software tools, with enough information to allow them to be uniquely identified, should be included in the Methods section. Authors are strongly encouraged to cite <a href="#">Research Resource Identifiers</a> (RRIDs) for antibodies, model organisms and tools, where possible.</p> <p>Have you included the information requested as detailed in our <a href="#">Minimum Standards Reporting Checklist</a>?</p>                                                                                  |            |
| <p><b>Availability of data and materials</b></p> <p>All datasets and code on which the conclusions of the paper rely must be either included in your submission or deposited in <a href="#">publicly available repositories</a> (where available and ethically appropriate), referencing such data using a unique identifier in the references and in the “Availability of Data and Materials” section of your manuscript.</p> <p>Have you have met the above requirement as detailed in our <a href="#">Minimum Standards Reporting Checklist</a>?</p> | <p>Yes</p> |

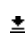

1  
2  
3  
4  
5  
6  
7  
8  
9  
10  
11  
12  
13  
14  
15  
16  
17  
18  
19  
20  
21  
22  
23  
24  
25  
26  
27  
28  
29  
30  
31  
32  
33  
34  
35  
36  
37  
38  
39  
40  
41  
42  
43  
44  
45  
46  
47  
48  
49  
50  
51  
52  
53  
54  
55  
56  
57  
58  
59  
60  
61  
62  
63  
64  
65

---

# 1 **Whole-genome resequencing reveals signatures of** 2 **selection and timing of duck domestication**

3 Zebin Zhang <sup>†,1</sup>, Yaxiong Jia<sup>†,2</sup>, Pedro Almeida<sup>3</sup>, Judith E Mank<sup>3,4</sup>, Marcel van  
4 Tuinen<sup>5</sup>, Qiong Wang<sup>1</sup>, Zhihua Jiang<sup>6</sup>, Yu Chen<sup>7</sup>, Kai Zhan<sup>8</sup>, Shuisheng Hou<sup>2</sup>,  
5 Zhengkui Zhou<sup>2</sup>, Huifang Li<sup>9</sup> Fangxi Yang<sup>10</sup>, Yong He<sup>11</sup>, [Zhonghua Ning<sup>1</sup>](#), [Ning](#)  
6 [Yang<sup>1</sup>](#), and Lujiang Qu<sup>1\*</sup>

7 <sup>1</sup>Department of Animal Genetics and Breeding, National Engineering  
8 Laboratory for Animal Breeding, College of Animal Science and Technology,  
9 China Agricultural University, Beijing, China

10 <sup>2</sup>Institute of Animal Science, Chinese Academy of Agricultural Sciences, Beijing,  
11 China

12 <sup>3</sup>Department of Genetics, Evolution and Environment, University College  
13 London, London, UK

14 <sup>4</sup>Department of Organismal Biology, Evolutionary Biology Centre, Uppsala  
15 University, Uppsala, Sweden

16 <sup>5</sup>Centre of Evolutionary and Ecological Studies, Marine Evolution and  
17 Conservation Group, University of Groningen, Groningen, The Netherlands

18 <sup>6</sup>Department of Animal Sciences, Center for Reproductive Biology, Veterinary  
19 and Biomedical Research Building, Washington State University, Pullman,  
20 United States

21 <sup>7</sup>Beijing Municipal General Station of Animal Science, Beijing, China

1  
2  
3  
4  
5  
6  
7  
8  
9  
10  
11  
12  
13  
14  
15  
16  
17  
18  
19  
20  
21  
22  
23  
24  
25  
26  
27  
28  
29  
30  
31  
32  
33  
34  
35  
36  
37  
38  
39  
40  
41  
42  
43  
44  
45  
46  
47  
48  
49  
50  
51  
52  
53  
54  
55  
56  
57  
58  
59  
60  
61  
62  
63  
64  
65

- 
- 22 <sup>8</sup>Institute of Animal Husbandry and Veterinary Medicine, Anhui Academy of  
23 Agricultural Sciences, Hefei, China
- 24 <sup>9</sup>Poultry Institute, Chinese Academy of Agriculture Science, Yangzhou, China
- 25 <sup>10</sup>Institute of Pekin Duck, Beijing, China
- 26 <sup>11</sup>Cherry Valley farms (xianghe) Co.,Ltd, Langfang, China
- 27 †These authors contributed equally to this work.
- 28 \*Corresponding authors: [guluj@163.com](mailto:guluj@163.com)

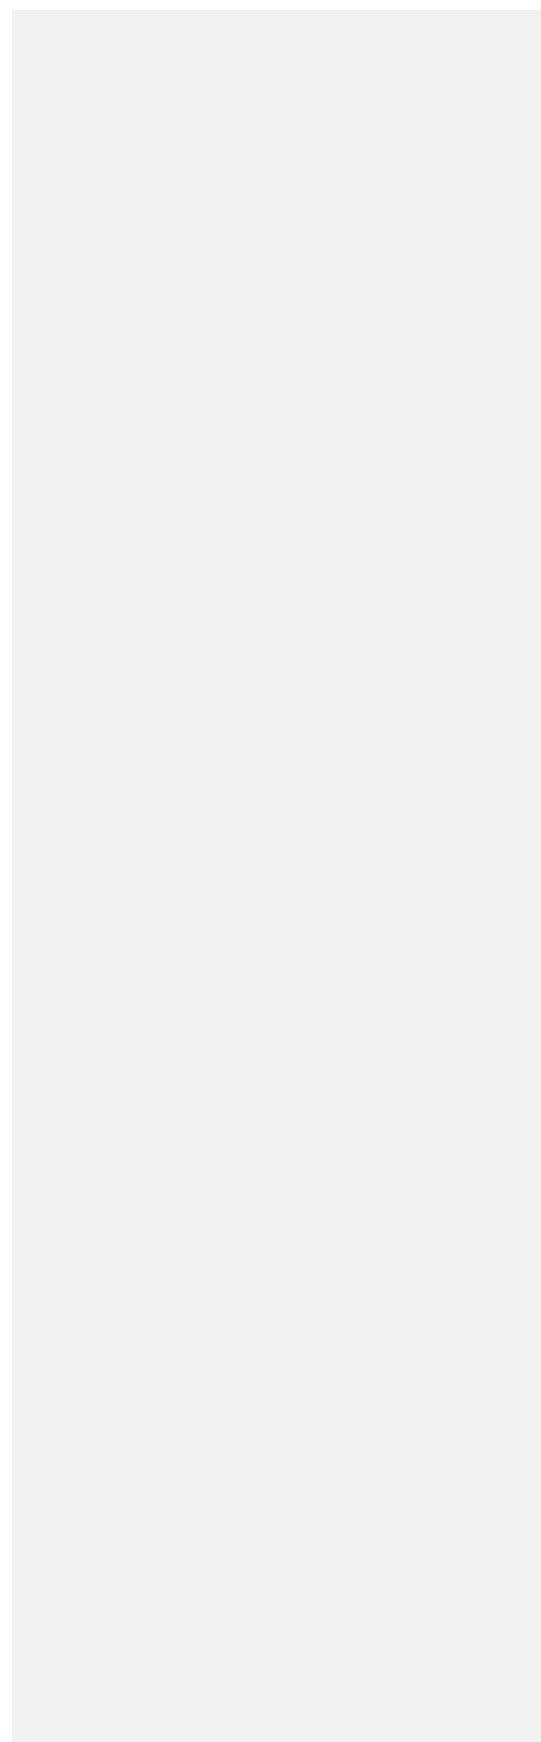

---

## Abstract

**Background:** The genetic basis of animal domestication remains poorly understood, and systems with substantial phenotypic differences between wild and domestic populations are useful for elucidating the genetic basis of adaptation to new environments as well as the genetic basis of rapid phenotypic change. Here, we sequenced the whole genome of 78 individual ducks, from two wild ~~populations~~ and seven domesticated populations, with an average sequencing depth ~~of 6.42X per individual~~ ~~> 45X for each population~~.

**Results:** Our population and demographic analysis indicates a complex history of domestication, with early selection for separate meat and egg lineages. Genomic comparison of wild to domesticated populations suggest that genes affecting brain and neuronal development have undergone strong positive selection during domestication. Our  $F_{ST}$  analysis also ~~indicates for the first time of indicates that~~ ~~is~~ ~~associated the result of~~ ~~with~~ selection at the *melanogenesis associated transcription factor* locus.

**Conclusions:** Our results advance the understanding of animal domestication and selection for complex phenotypic traits.

**Keywords:** duck, domestication, intensive selection, neuronal development, energy metabolism, plumage colouration.

## 51 IntroductionBackground

52 Animal domestication was one of the major contributory factors ~~ef~~to the  
53 agricultural revolution during the Neolithic period, which resulted in a shift in  
54 human lifestyle from hunting to farming [1]. Compared with their wild  
55 progenitors, domesticated animals showed notable changes in behavior,  
56 morphology, physiology, and reproduction [2]. Detecting domestication  
57 mediated selective signatures is important for understanding the genetic basis  
58 of animal both adaptation to ~~a~~ new environments and rapid phenotype changes  
59 in a short period of time [3, 4]. In recent years, to characterize signatures of  
60 domestication, whole genome resequencing studies have been performed on  
61 a wide range of agricultural important organisms, such as observed in pig [5],  
62 sheep [6], rabbit [7] and chicken [8, 9].

63 Mallards (*Anas platyrhynchos*) ~~(ducks or mallards)~~ are the world's most  
64 widely distributed and agriculturally important waterfowl species, and are of  
65 particular economic ~~and~~ importance in Asia [10]. Southeast Asia, particularly  
66 southern China, is the major center of duck domestication, with records  
67 indicating duck farming in the region dating at least 2,000 years [11, 12],  
68 particularly in wet environments [13] associated with rice crops [14]. In the  
69 absence of archaeological evidence, the exact timing of domestication and the  
70 time of meat and egg type ducks split remains unknown, with the first written  
71 records indicating domestic ducks in central China shortly after 500 BC [15].

72 It is clear that the domesticated duck originated from mallards (*Anas*

Formatted: Font: Not Italic

Formatted: Font: Not Italic

---

73 *platyrhynchos* [16], and domestic ducks can be classified as those produced  
74 primarily for meat (similar to chicken broilers) or eggs— (similar to chicken layer  
75 lines). Together with the timing of duck domestication, the relative separation of  
76 duck meat and egg lines is also unknown. It is unclear whether ducks were  
77 domesticated once, and subsequently selected for divergent meat and egg  
78 production traits, or whether meat and egg populations were derived  
79 independently in two domestication events from wild mallards.

80 Moreover, domesticated mallards show many important behavioral [17]  
81 and morphological [18-20] differences from their wild ancestors, particularly  
82 related to plumage and neuroanatomy. However, the genetic basis of these  
83 phenotypic differences are still poorly understood.  
84 ~~—offering an important opportunity to understand the genetic basis of these~~  
85 ~~phenotypic differences.—~~

## 86 Data Description

87 In order to determine the timing of duck domestication in China, as well as  
88 identify the genomic regions under selection during domestication, we  
89 performed whole genome resequencing from 78 individuals belonging to seven  
90 different duck breeds (three for meat breeds, three for egg breeds, and one  
91 dual-purpose breed) and two geographically distinct wild populations. A total of  
92 613.37 Gb high quality paired end sequence data were recovered after initial  
93 quality control. Using the large number of 36.1 million single nucleotide



1  
2  
3  
4  
5  
6  
7  
8  
9  
10  
11  
12  
13  
14  
15  
16  
17  
18  
19  
20  
21  
22  
23  
24  
25  
26  
27  
28  
29  
30  
31  
32  
33  
34  
35  
36  
37  
38  
39  
40  
41  
42  
43  
44  
45  
46  
47  
48  
49  
50  
51  
52  
53  
54  
55  
56  
57  
58  
59  
60  
61  
62  
63  
64  
65

---

94 polymorphisms (SNPs) ~~and 3.1 million as well as~~ small insertions and deletions  
95 (INDELs) ~~we detected~~, we analyzed the structure of these populations and  
96 signatures of selection associated with domestication. ~~We inferred the~~  
97 ~~demographic scenarios with the pairwise sequentially —Markovian~~  
98 ~~coalescent method combined with the diffusion approximation method. We~~  
99 ~~identified two distinct domesticated populations, originating from a single~~  
100 ~~domestication event roughly 2000 years ago. We also identified signatures of~~  
101 ~~selection on genes associated with neuronal development, energy metabolism,~~  
102 ~~vision and plumage during domestication. Together, our results reveal a~~  
103 ~~complex pattern of selection associated with the domestication of the duck.~~

104 ~~The whole genome resequencing data and SNP and INDEL variant~~  
105 ~~datasets are valuable resources for researchers studying evolution,~~  
106 ~~domestication or trait discovery, and for breeders of *Anas platyrhynchos*.~~  
107 ~~Furthermore, the data represent a foundation for development of new, ultrahigh~~  
108 ~~density variant screening arrays for duck population level trait analysis and~~  
109 ~~genomic selection.~~

Formatted: Font: Italic

## 111 **Results** **Analyses**

### 112 **Genetic variation**

113 We individually sequenced 22 wild and 56 domestic ducks, from two wild  
114 populations and seven domestic breeds (three meat breeds, three egg breeds

1  
2  
3  
4  
5  
6  
7  
8  
9  
10  
11  
12  
13  
14  
15  
16  
17  
18  
19  
20  
21  
22  
23  
24  
25  
26  
27  
28  
29  
30  
31  
32  
33  
34  
35  
36  
37  
38  
39  
40  
41  
42  
43  
44  
45  
46  
47  
48  
49  
50  
51  
52  
53  
54  
55  
56  
57  
58  
59  
60  
61  
62  
63  
64  
65

115 and one dual-purpose breed), from across China (Fig. 1A) to an average of  
 116 6.42X coverage per individual after filtering and quality control, resulting in total  
 117 535 billion mappable reads [across 78 duck individuals](#) (Supplemental Table S1).

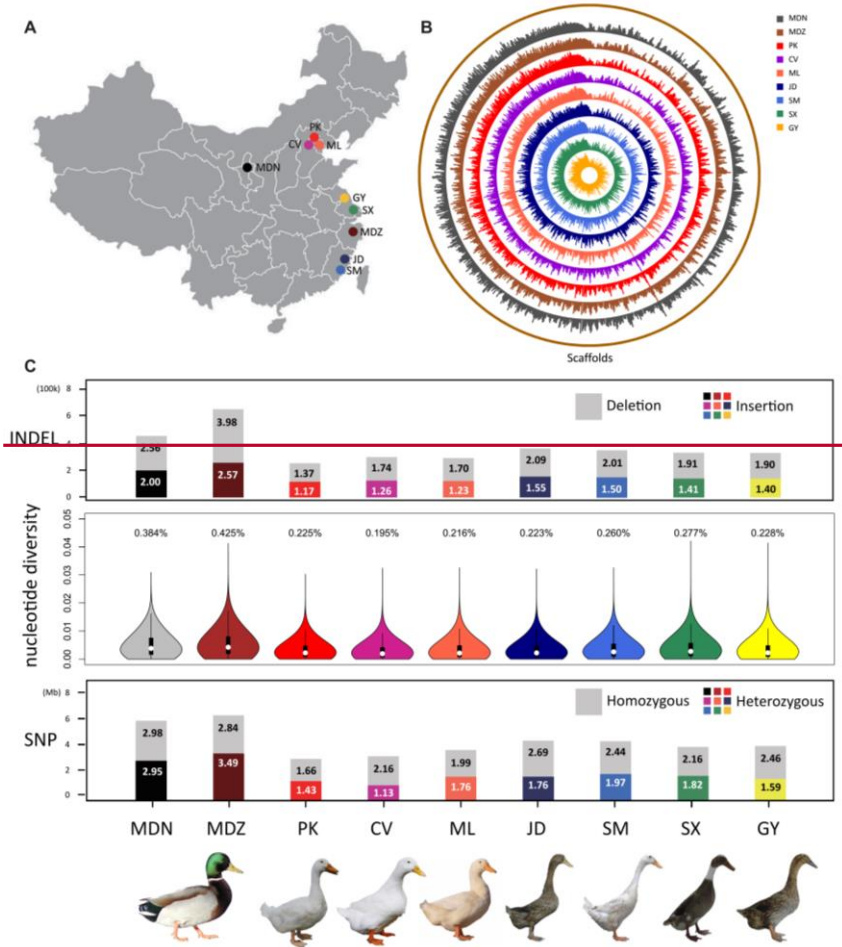

118

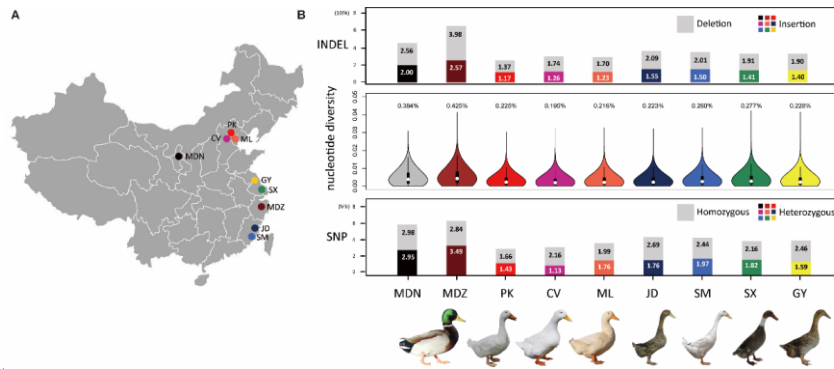

Formatted: Font:

**Figure. 1 Experimental design and variants statistics**

**(A)** Sampling sites in this study. A total of 78 ducks from two wild populations (Mallard Ningxia (MDN) n=8; Mallard Zhejiang (MDZ) n=14), three meat breeds (Pekin (PK) n=8; Cherry Valley (CV) n=8; Maple Leaf (ML) n=8), three egg breeds (Jin Ding (JD) n=8; Shan Ma (SM) n=8; Shao Xing (SX) n=8), and one dual purpose breed (Gao You (GY) n=8) were selected.

**(B)** Circos plot of SNP distribution and density of seven domestic breeds and two wild populations across the genome. The duck whole genome reference is shown in the outermost circle (non-overlapping, window size = 1 Mb).

**(C)** Genomic variation of nine populations ducks. Mean number of SNPs, heterozygous and homozygous SNP ratio in the nine populations as are shown at the bottom. Homozygous SNP ratios in domesticated ducks are significantly higher than ratios in wild mallards ( $p = 1.35 \times 10^{-10}$ ). Nucleotide diversity ratios of in the nine populations are shown at the middle. The nucleotide diversity ratios in wild mallards are dramatically higher than ratios in domesticated ducks ( $p = 2.20 \times 10^{-16}$ ). Number of insertions and deletions in the nine populations are shown at the top. The number of deletions was higher than the number of insertions in all nine populations.

1  
2  
3  
4  
5  
6  
7  
8  
9  
10  
11  
12  
13  
14  
15  
16  
17  
18  
19  
20  
21  
22  
23  
24  
25  
26  
27  
28  
29  
30  
31  
32  
33  
34  
35  
36  
37  
38  
39  
40  
41  
42  
43  
44  
45  
46  
47  
48  
49  
50  
51  
52  
53  
54  
55  
56  
57  
58  
59  
60  
61  
62  
63  
64  
65

136  
137  
138  
139  
140  
141  
142  
143  
144  
145  
146  
147  
148  
149  
150  
151  
152  
153  
154  
155  
156

We detected 36.1 million (M) SNPs in total, with an average for each individual of 4.5M SNPs (range = 2.34 – 9.52M), which covered covering 96.2% of the duck dbSNP database deposited in the Genome Variation Map (GVM) (<http://bigd.big.ac.cn/gvm/>). We also identified 3.1M INDELs, with an average of 0.4M INDELs (range = 0.21 – 0.89M) (Fig. 4C1B, Supplemental Figs. S1 - S2, Supplemental Table S2). Single base-pair INDELs were the predominant form, accounting for 38.63% of all detected INDELs (Supplemental Table S3). Both the number of SNPs (t test,  $p = 3.13 \times 10^{-12}$ ) and nucleotide diversity (t test,  $p = 2.20 \times 10^{-16}$ ) are lower in domesticated compared to wild mallards (Fig. 1B—C), and homozygous SNP ratios in domesticated ducks are significantly higher than ratios in wild mallards (t test,  $p = 1.35 \times 10^{-10}$ .) consistent with the larger panmictic wild population. Single base-pair INDELs were the predominant form, accounting for 38.63% of all detected INDELs (Supplemental Table S3).

Population structure and domestication

Phylogenetic relationships, based on a neighbor-joining (NJ) of pairwise genetic distances of whole genome SNPs (Fig. 2A) and Principal Component Analysis (PCA, Fig. 2B) revealed strong clustering into three distinct genetic groups. The two wild populations (MDN and MDZ) clustered together, with the three meat type population ducks (PK, CV, and ML) clustered together into a

- Formatted: Font: 12 pt

1  
2  
3  
4  
5  
6  
7  
8  
9  
10  
11  
12  
13  
14  
15  
16  
17  
18  
19  
20  
21  
22  
23  
24  
25  
26  
27  
28  
29  
30  
31  
32  
33  
34  
35  
36  
37  
38  
39  
40  
41  
42  
43  
44  
45  
46  
47  
48  
49  
50  
51  
52  
53  
54  
55  
56  
57  
58  
59  
60  
61  
62  
63  
64  
65

157 second group, and the three egg type populations (JD, SM, and SX) clustered  
158 with the dual-purpose type ducks (GY) into a third group.

159 We further performed population structure analysis using FRAPPE [21],  
160 which estimates individual ancestry and admixture proportions assuming K  
161 ancestral populations (Fig. 2C). With K = 2, a clear division was found between  
162 wild type ducks (MDN and MDZ) and domesticated ducks (PK, CV, ML, JD, SM,  
163 SX, and GY). With K = 3, a clear division was found between meat type ducks  
164 (PK, CV, and ML) and egg type ducks mixed with dual-purpose type ducks (JD,  
165 SM, SX, and GY).

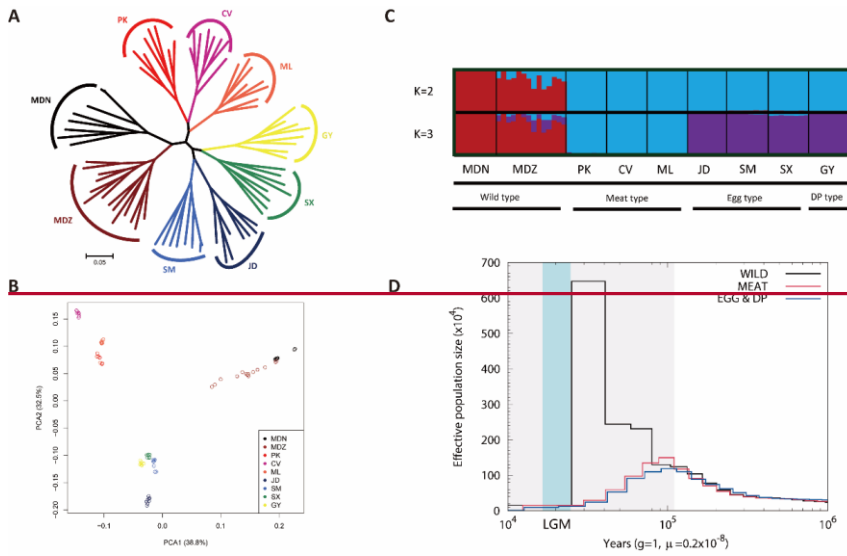

Formatted: Font: Bold

166

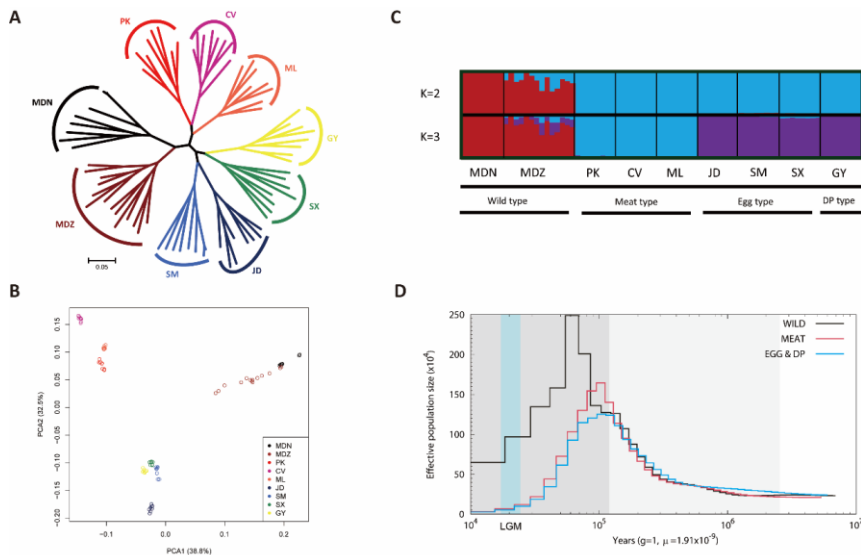

167

168 **Figure. 2 Population genetic structure and demographic history of nine duck**  
 169 **populations**

170 **(A)** Neighbor-joining phylogenetic tree of nine duck populations. The scale bar is  
 171 proportional to genetic differentiation ( $p$  distance).

172 **(B)** PCA plot of duck populations. Eigenvector 1 and 2 explained 38.8% and 32.5% of the  
 173 observed variance, respectively.

174 **(C)** Population genetic structure of 78 ducks. The length of each colored segment  
 175 represents the proportion of the individual genome inferred from ancestral populations ( $K = 2$ -  
 176 3). The population names and production type are at the bottom. DP type means dual-purpose  
 177 type.

178 **(D)** Demographic history of duck populations. Examples of PSMC estimate changes in the  
 179 effective population size over time, representing variation in inferred  $N_e$  dynamics. The lines  
 180 represent inferred population sizes and the gray shaded areas indicate the Pleistocene period,

1  
2  
3  
4  
5  
6  
7  
8  
9  
10  
11  
12  
13  
14  
15  
16  
17  
18  
19  
20  
21  
22  
23  
24  
25  
26  
27  
28  
29  
30  
31  
32  
33  
34  
35  
36  
37  
38  
39  
40  
41  
42  
43  
44  
45  
46  
47  
48  
49  
50  
51  
52  
53  
54  
55  
56  
57  
58  
59  
60  
61  
62  
63  
64  
65

---

181 with Last Glacial Period (LGP) shown in darker gray, and Last Glacial Maximum (LGM) shown  
182 in light blue areas.

183  
184 Together, these results indicate two genetic clusters of domesticated  
185 breeds, either domesticated once with subsequent subdivision due to divergent  
186 selection, or domesticated twice independently. In order to differentiate these  
187 alternatives, we explored the demographic history of our samples, first  
188 estimating changes in effective population size ( $N_e$ ) in our three genetic clusters  
189 in a pairwise sequentially\_Markovian coalescent (PSMC) framework [22]. The  
190 meat type ducks (PK, CV, and ML) showed concordant demographic  
191 trajectories with egg and ~~mixture\_~~ dual-purposetype populations (JD, SM, SX,  
192 and GY) with one apparent expansion around the Penultimate Glaciation Period  
193 (PGP, 0.30-0.13 Mya) [4, 23] and Last Glacial Period (LGP, 110-12 kya) [24, 25],  
194 followed by a subsequent contraction (Fig. 2D).

195 We tested multiple demographic scenarios related to domestication using  
196 a diffusion approximation method for the allele frequency spectrum ( $\partial a \partial i$ )  
197 (Supplemental Fig. S3 and S4). Among the four isolation models tested (models  
198 1 - 4), the model of a single domestication with subsequent divergence of the  
199 domesticated breeds (Model 2) was both consistent with our population  
200 structure results (Fig. 2) and had the lowest Akaike Information Criteria (AIC)  
201 value, indicating a better overall fit to the data (log-likelihood = -33,388.43; AIC  
202 = 66,788) (Supplemental Fig. S3).



Demographic parameters estimated from the single domestication model (Model 2) indicated that domestication occurred approximately 2,200,228, with 95% confidence intervals (CI) ± 441 years ago, followed by a rapid subsequent divergence of the meat breed from the egg/dual purpose breeds roughly 100 years after the initial domestication event (Table 1). Our results suggest that following an initial bottleneck associated with domestication, with an estimated  $N_e$  of 305–320 (95% CI ± 3) individuals for the ancestral domesticated population, the population has expanded to the current  $N_e$  of 5,597 (95% CI ± 1,195) 5,345 and 12,988 (95% CI ± 2,877) 12,404 in the meat type and egg/dual purpose breeds respectively.  $N_e$  estimates for domesticated breeds are lower than ~~that~~ in wild mallards, consistent with the large panmictic wild population.

**Table 1.** Maximum likelihood population demographic parameters. Best fit parameter estimates for the model of a single domestication event followed by divergence of the domesticated breeds, including changes in population size. 95% confidence intervals were obtained from 100 bootstrap data sets. Time estimates are given in years and migration are in units of number of migrants per generation.

| Parameter                                       | ML estimate                       | 95% CI                          |                                     |
|-------------------------------------------------|-----------------------------------|---------------------------------|-------------------------------------|
| $N_e$ of ancestral population after size change | <u>663,439</u> <del>633,584</del> | <u>644,726</u> <del>– 681</del> | Formatted: Indent: First line: 0 ch |
| $N_e$ of the wild population                    | <u>88,842</u> <del>84,845</del>   | <u>70,778</u> <del>– 106</del>  | Formatted Table                     |
| $N_e$ of the ancestral domesticated population  | <u>305</u> <del>320</del>         | <u>316</u> <del>– 323</del>     | Formatted: Indent: First line: 0 ch |
| $N_e$ of the meat breed                         | <u>5,597</u> <del>5,345</del>     | <u>4,402</u> <del>– 6,792</del> | Formatted: Indent: First line: 0 ch |
| $N_e$ of the egg/dual purpose                   | <u>12,988</u> <del>12,404</del>   | <u>10,111</u> <del>– 15,8</del> | Formatted: Indent: First line: 0 ch |
| Time of size change in the ancestral population | <u>249,944</u> <del>238,696</del> | <u>227,912</u> <del>– 26</del>  | Formatted: Indent: First line: 0 ch |
| Time of domestication                           | <u>2,228</u> <del>2,128</del>     | <u>1,787</u> <del>– 2,669</del> | Formatted: Indent: First line: 0 ch |
| Time of breed divergence                        | <u>2,126</u> <del>2,030</del>     | <u>1,686</u> <del>– 2,567</del> | Formatted: Indent: First line: 0 ch |
| Migration <sub>wild ← meat</sub>                | <u>1.21</u> <del>2</del>          | <u>1.00</u> <del>– 1.24</del>   | Formatted: Indent: First line: 0 ch |

223

224 Gene flow estimates were relatively high, and were 1 and 4 migrants per  
225 generation from the meat and egg/dual purpose breeds, respectively, into the  
226 wild population. Difficulty in differentiating between very recent divergence and  
227 high migration rates in the frequency spectrum prevented convergence  
228 between independent runs when trying to fit other migration parameters to our  
229 model.

### 230 Selection for plumage color

231 Derived traits in domesticated animals tend to evolve in a predictable order,  
232 with color variation appearing in the earliest stages of domestication, followed  
233 by coat or plumage and structural (skeletal and soft tissue) variation, and finally  
234 behavioral differences [26, 27]. One of the simplest and most visible derived  
235 traits of ducks is white plumage color. In order to detect the signature of  
236 selection associated with white feathers, we searched the duck genome for  
237 regions with high  $F_{ST}$  among the populations of white feather (PK, CV, and ML)  
238 and non-white feather (MDN, MDZ, JD, SX, and GY) based on sliding windows  
239 of 10kb windows. We identified a region of high differentiation between white  
240 plumage and non-white plumage ducks overlapping the *melanogenesis*  
241 *associated transcription factor* (*MITF*;  $F_{ST}=0.69$ ) (Fig. 3A). In the intronic region  
242 of *MITF*, we identified 13 homozygous SNPs and 2 homozygous INDELS  
243 present in all white plumage breeds (n=24). These SNPS-variants were absent  
244 in all non-white plumage breeds (n=46) (Fig. 3B). These mutations were

1  
2  
3  
4  
5  
6  
7  
8  
9  
10  
11  
12  
13  
14  
15  
16  
17  
18  
19  
20  
21  
22  
23  
24  
25  
26  
27  
28  
29  
30  
31  
32  
33  
34  
35  
36  
37  
38  
39  
40  
41  
42  
43  
44  
45  
46  
47  
48  
49  
50  
51  
52  
53  
54  
55  
56  
57  
58  
59  
60  
61  
62  
63  
64  
65

245 completely consistent with ~~the~~ white plumage phenotype suggesting a  
246 causative mutation. Our result ~~first~~ first indicates for the first time the duck white  
247 plumage is completely associated with selection at the *MITF* locus. Moreover,  
248 to validate the reliability of variants detected in MITF gene, we amplified the first  
249 three SNPs (SNP817793, SNP817818, and SNP818004) and all INDELs by  
250 diagnostic PCR combined with Sanger sequencing in the 78 white and non-  
251 white plumage ducks. The results show that the three SNPs and INDEL817958  
252 completely match our NGS analysis (supplemental Fig. S5), For INDEL818495,  
253 we were unable to design a suitable PCR primer.

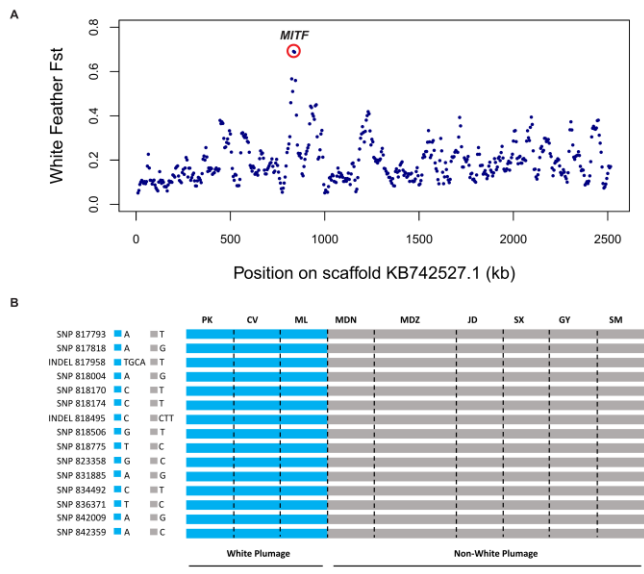

254  
255 **Figure. 3 MITF shows different genetic signature between white plumage and non-white**  
256 **plumage ducks.**

257 (A) FST plot around the MITF locus. The FST value of MITF is highest for scaffold  
258 KB742527.1, circled in red. Each plot represent a 10 kb windows.

1  
2  
3  
4  
5  
6  
7  
8  
9  
10  
11  
12  
13  
14  
15  
16  
17  
18  
19  
20  
21  
22  
23  
24  
25  
26  
27  
28  
29  
30  
31  
32  
33  
34  
35  
36  
37  
38  
39  
40  
41  
42  
43  
44  
45  
46  
47  
48  
49  
50  
51  
52  
53  
54  
55  
56  
57  
58  
59  
60  
61  
62  
63  
64  
65

---

259 (B) 13 homozygous SNPs and 2 homozygous INDELs were identified in white plumage  
260 ducks and absent in non-white plumage ducks. SNPs and INDELs were named  
261 according to their position on scaffold.

### 262 Selection for other domestication traits

263 In order to detect the signature of selection for other traits associated with  
264 duck domestication, we scanned the duck genome for regions with a high  
265 coefficient of nucleotide differentiation ( $F_{ST}$ ) among the populations of wild types  
266 (MDN and MDZ) and domesticated types (PK, CV, ML, JD, SM, SX, and GY)  
267 based on sliding windows of 10kb size windows, as well as global  $F_{ST}$  between  
268 each population (Supplemental Tables S4). Owing to the complex and partly  
269 unresolved demography of these populations, it is difficult to define a strict  
270 threshold that distinguishes true sweeps from regions of homozygosity caused  
271 by drift. We therefore also calculated pairwise diversity ratio  
272 ( $\theta_{\pi}$ (wild/domesticated)). We identified 292 genes in the top 5% of both  $F_{ST}$  and  
273  $\theta_{\pi}$  scores, putatively under positive selection during domestication (Fig. 4A,  
274 Supplemental Tables S4S5).

Formatted: Subscript

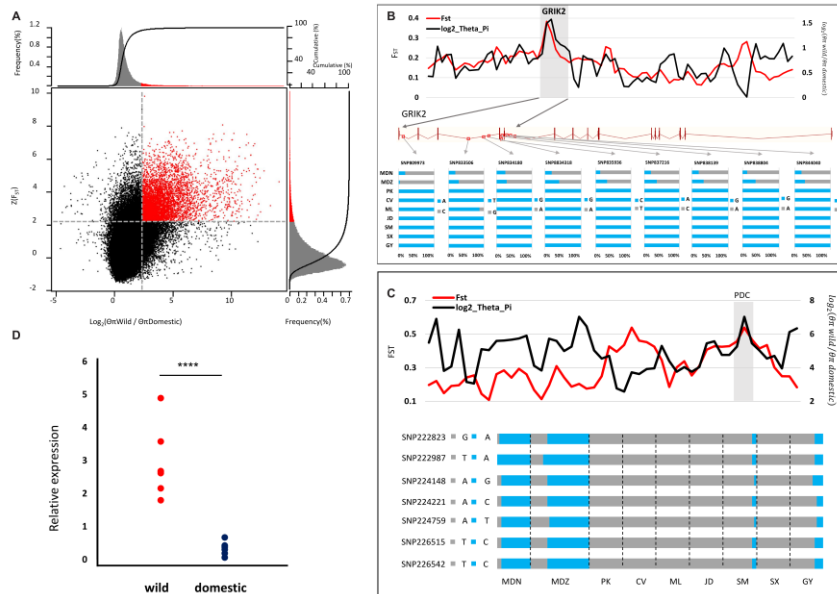

**Figure 4 Genomic regions with strong selective sweep signals in wild population ducks and domesticated population ducks.**

(A) Distribution of  $\theta\pi$  ratios  $\theta\pi(\text{wild}/\text{domesticated})$  and  $Z(F_{ST})$  values, which are calculated using scaffolds longer than 10 kb by 10-kb windows with 5-kb steps. Only scaffolds > 10kb were used for our calculation, as  $F_{ST}$  result calculated on small scaffold are unlikely to be accurate. Red data points located to the top-right regions correspond to the 5% right tails of empirical  $\log_2(\theta\pi_{wild}/\theta\pi_{domestic})$  ratio distribution and the top 5% empirical  $Z(F_{ST})$  distribution are genomic regions under selection during duck domestication. The two horizontal and vertical gray lines represented the top 5% value of  $Z(F_{ST})$  (2.216) and  $\log_2(\theta\pi_{wild}/\theta\pi_{domestic})$  (2.375), respectively.

(B)  $\log_2(\theta\pi)$  ratios and  $F_{ST}$  values around the *GRIK2* locus and allele frequencies of nine SNPs within the *GRIK2* gene across nine duck populations. The black and red lines represent  $\log_2(\theta\pi_{wild}/\theta\pi_{domestic})$  ratios and  $F_{ST}$  values, respectively. The gray bar

Formatted: Subscript

1  
2  
3  
4  
5  
6  
7 289 showed the region of under strong selection in *GRIK2* gene. The nine red rectangular frame  
8  
9 290 corresponding to the locus on gene of nine SNPs. The SNPs were named according to their  
10  
11 291 position on scaffold.

12  
13 292 (C) The *PDC* gene showed different genetic signature in domesticated and wild duck.  
14  
15  
16 293  $\log_2(\theta\pi)$  ratios and  $F_{ST}$  values around the *PDC* locus. The *PDC* gene region ~~i-was showed~~  
17  
18 294 ~~shown~~ in gray ~~par~~. Allele frequencies of seven SNPs within the *PDC* gene across nine duck  
19  
20 295 populations. The SNPs ~~arewere~~ named according to their ~~scaffold position on scaffold n~~.

21  
22 296 (D) The *PDC* gene expression level ~~different-differs between in~~ domesticated and wild duck.  
23  
24 297 *PDC* mRNA expression levels in brain of wild (MDN, n=3; MDZ, n=4) and domesticated (PK,  
25  
26 298 n=1; CV, n=1; ML, n=1; JD, n=1; SM, n=1; SX, n=1; GY, n=1) ducks. \*\*\*\**P* value from *t*-test  
27  
28 299 ( $P < 0.0001$ ).

29  
30  
31 300 All 292 genes located in the 5%  $F_{ST}$  regions were used for the GO analysis,  
32  
33 301 resulting in a total of 57 GO enrichment terms (supplementary table S6).

34  
35 302 Because domesticated ducks are known to differ from wild ducks in body size,  
36  
37 303 body fat percentage, behavior, egg productivity, growth speed, and flight  
38  
39 304 capability, we focused our analysis on GO annotations of neural related  
40  
41 305 processes, lipid metabolism and energy metabolism, reproduction, and skeletal  
42  
43 306 muscle contraction for our 292 putative positively selection genes. In this  
44  
45 307 reduced data set, the neuro-synapse-axon and lipid-energy metabolism  
46  
47 308 pathways were over-represented (Supplemental Table ~~S5~~S7) in our list of  
48  
49 309 genes under selection.

50  
51  
52 310 From the highlighted GO terms, a total of 25 neuro-synapse-axon genes  
53  
54  
55  
56  
57  
58  
59  
60  
61  
62  
63  
64  
65

1  
2  
3  
4  
5  
6  
7  
8  
9  
10  
11  
12  
13  
14  
15  
16  
17  
18  
19  
20  
21  
22  
23  
24  
25  
26  
27  
28  
29  
30  
31  
32  
33  
34  
35  
36  
37  
38  
39  
40  
41  
42  
43  
44  
45  
46  
47  
48  
49  
50  
51  
52  
53  
54  
55  
56  
57  
58  
59  
60  
61  
62  
63  
64  
65

---

§11 were identified as being under positive selection, with six (*ADGRB3*, *EFNA5*,  
§12 *GRIN3A*, *GRIK2*, *SYNGAP1*, and *HOMER1*) in the top 1% of  $F_{ST}$  and  $\theta_{\pi}$   
§13 ([Supplemental Tables S6S8](#)). In particular, *GRIK2* (glutamate receptor,  
§14 ionotropic kainate 2) and *GRIN3A* (glutamate receptor, subunit 3A) both  
§15 showed high  $F_{ST}$  and  $\theta_{\pi}$  value compared to neighboring regions, suggesting  
§16 functional importance ([Fig. 3B](#), [Supplemental Table S4S5](#), [S6S8](#)).

§17 Beyond the neuronal-synapse-axon genes, 115 genes were identified in  
§18 the four lipid and energy related pathways with high  $F_{ST}$  and  $\theta_{\pi}$  values,  
§19 particularly related to gatty-fatty acid metabolism. Among these genes, 37  
§20 genes were found with both parameters yielding top 1% ranked values  
§21 ([Supplemental Tables S6S8](#)), such as phosphatidylinositol 3-kinase catalytic  
§22 subunit type 3 (*PIK3C3*), and patatin like phospholipase domain containing 8  
§23 (*PNPLA8*).

§24 To infer whether selection extends beyond yielding novel allelic variation  
§25 and-by also affecting gene expression, we compared individual gene  
§26 expression in the brain, liver, and in breast muscle between seven wild mallards  
§27 and seven domesticated ducks in natural states with RNA-seq ([Supplemental](#)  
§28 [Tables S7S9](#)). We detected three genes (*PDC*, *MLPH*, and *NID2*) in the brain,  
§29 two genes (*MAPK12* and *BST1*) in the liver, and zero-no genes in breast  
§30 muscle with significantly different expression between wild and domesticated  
§31 ducks. Of the five differentially expressed genes, *PDC* was the only gene which  
§32 also showed evidence of a selective sweep at the genomic level ([Supplemental](#)



1  
2  
3  
4  
5  
6  
7  
8  
9  
10  
11  
12  
13  
14  
15  
16  
17  
18  
19  
20  
21  
22  
23  
24  
25  
26  
27  
28  
29  
30  
31  
32  
33  
34  
35  
36  
37  
38  
39  
40  
41  
42  
43  
44  
45  
46  
47  
48  
49  
50  
51  
52  
53  
54  
55  
56  
57  
58  
59  
60  
61  
62  
63  
64  
65

---

333 [Tables S4S5](#), Fig. 3C - D). The results ~~imply suggest~~ that the *PDC* gene is of  
334 substantial functional importance in phenotypic differentiation among wild and  
335 domestic ducks ~~through both allelic and expression differences~~.

## 336 Discussion

337 Animal domestication was one of the major contributory factors of the  
338 agricultural revolution during the Neolithic period, which resulted in a shift in  
339 human lifestyle from hunting to farming [1]. Since this transition, domesticated  
340 animals have contributed greatly to human society and human population  
341 growth by provision of stable animal protein, fat, and accessory products such  
342 as leather and feathers (including down). Whole genome sequencing has made  
343 it possible to illuminate the genetic trajectories of animal domestication such as  
344 those observed in pig [5], sheep [6], rabbit [7] and chicken [8, 9].

345 In this study, we performed whole-genome sequencing of 78 ducks  
346 including seven domesticate breeds and two wild populations. This is the first  
347 study to characterize the genetic architecture, phylogenetic relationships and  
348 domestication history of domesticated ducks and wild mallards. We first  
349 catalogued ~~millions of~~ 36.1M SNPs and 3.1M INDELS, and in both [types of](#)  
350 [variantseases](#), we observed higher mean variant numbers and nucleotide  
351 diversity for the wild mallard populations compared to the domestics, consistent  
352 with both a greater panmictic mallard population as well as recent sweeps  
353 associated with domestication.

1  
2  
3  
4  
5  
6  
7  
8  
9  
10  
11  
12  
13  
14  
15  
16  
17  
18  
19  
20  
21  
22  
23  
24  
25  
26  
27  
28  
29  
30  
31  
32  
33  
34  
35  
36  
37  
38  
39  
40  
41  
42  
43  
44  
45  
46  
47  
48  
49  
50  
51  
52  
53  
54  
55  
56  
57  
58  
59  
60  
61  
62  
63  
64  
65

---

## 354 Population structure and domestication

355 We observed a large expansion of the duck population at the interglacial  
356 period, which could be the result of beneficial climatic changes, including rising  
357 temperatures and sea levels. In contrast, the glacial maximum coincided with a  
358 much reduced duck population size, consistent with harsher conditions and  
359 limited access to arctic breeding grounds [4, 28-30]. The demographic pattern  
360 we observe in wild ducks is similar to that observed in wild boars [5], wild yaks  
361 [31], and wild horses [32]. However, it is worth noting that although PSMC is a  
362 powerful method to infer changes in  $N_e$  over time, it is also sensitive to  
363 deviations from a neutral model. The effects of genetic drift and/or selection  
364 could lead to time-dependent estimates of mutation rate, and bias our estimates  
365 of population expansion [25].

366 We observed three genetic clusters, with wild mallard, meat breeds, and  
367 egg/dual purpose breeds each representing unique groups. These results  
368 suggest either a single domestication event followed by subsequent breed-  
369 specific selection, or two separate domestication events. In order to distinguish  
370 alternative models of domestication, we modeled population demographics and  
371 found strong support for a single domestication event roughly 2,400-200 years  
372 ago, with the rapid subsequent selection for separate meat and egg/dual  
373 purpose breeds roughly 100 generations later. We note that the evolutionary  
374 history of wild mallards and domesticated duck breeds is likely to be more  
375 complex than the simple demographic scenarios modelled here, and further

1  
2  
3  
4  
5  
6  
7 376 studies may be needed to fully capture the evolutionary dynamics of duck  
8  
9 377 domestication. [Given the recent origin of wild ducks, as well as the high levels](#)  
10  
11 378 [of diversity we observe in the wild and domestic duck genomes, it is not possible](#)  
12  
13 379 [to differentiate recent admixture from incomplete lineage sorting with our](#)  
14  
15 380 [current data. This issue has important conservation implications, and](#)  
16  
17 381 [represents an interesting area for future study.](#)—Nevertheless, [the](#) time  
18  
19  
20 382 estimates obtained with our model are compatible with previous written records  
21  
22 383 from 500 BC [15].

#### 24 384 Selection for white plumage

26 385 Plumage color is an important domestication trait, and we compared  
27  
28 386 breeds with white plumage to those with colored plumage. We identified high  
29  
30 387 levels of divergence in the intronic region of the *MITF* gene, an important  
31  
32 388 developmental locus with a complex regulation implicated in pigmentation and  
33  
34 389 melanocyte development in several vertebrate species [33-35], including  
35  
36 390 Japanese quail [36] ~~and~~, dog [37], ~~and duck~~[38, 39].  
37  
38  
39

#### 40 391 Selection for other domestication traits

42  
43 392 In order to identify those genomic regions which have been the target of  
44  
45 393 selection during domestication, we used estimates of diversity between wild  
46  
47 394 and domestic samples, retaining those 292 genes in the top 5% of both  $F_{ST}$  and  
48  
49 395  $\theta_{\pi}$  values for further analysis. These genes were over-represented for both  
50  
51 396 neural developmental and lipid metabolism, suggesting that these  
52  
53  
54  
55  
56  
57  
58  
59  
60  
61  
62  
63  
64  
65

1  
2  
3  
4  
5  
6  
7  
8  
9  
10  
11  
12  
13  
14  
15  
16  
17  
18  
19  
20  
21  
22  
23  
24  
25  
26  
27  
28  
29  
30  
31  
32  
33  
34  
35  
36  
37  
38  
39  
40  
41  
42  
43  
44  
45  
46  
47  
48  
49  
50  
51  
52  
53  
54  
55  
56  
57  
58  
59  
60  
61  
62  
63  
64  
65

---

397 functionalities were under strong selection during domestication. Two loci,  
398 *GRIK2* and *GRIN3A*, showed particularly strong ~~signatures of genetic~~ signs of  
399 ~~selective~~ sweeps ~~presumably~~ associated with domestication. *GRIK2* encodes  
400 a subunit of a glutamate receptor that has a role in synaptic plasticity and is  
401 important for learning and memory. *GRIN3A* encodes a subunit of the N-methyl-  
402 D-aspartate (NMDAR) receptors, which is expressed abundantly in the human  
403 cerebral cortex [40] and is involved in the development of synaptic elements

404 We also identified five genes with significantly different expression in the  
405 brain and liver of ~~domestics~~ domesticated ducks compared to their wild  
406 ancestor. One of these, *PDC*, also showed evidence of selective sweeps at the  
407 genomic level. *PDC* encodes phosducin, a photoreceptor-specific protein highly  
408 expressed in retina and pineal gland [41], as well as the brain [42].

409 Our results suggest that *PDC*, *GRIK2* and *GRIN3A* may have played a  
410 crucial role in duck domestication by altering functional regulation of the  
411 developing brain and nervous system. This finding is consistent with theories  
412 that behavioral traits are the most critical in the initial steps of animal  
413 domestication, allowing animals to tolerate humans and captivity [43, 44].  
414 Indeed, compared to wild mallards, domestic ducks are more docile, less  
415 vigilant, and show important differences in brain morphology [17, 18].

416 Interestingly, ~~differential selection~~ differences between wild and domesticated  
417 animals in brain and nervous system functions due to ~~by~~ directional selection  
418 ~~were~~ also observed in domestication studies of rabbits [7], dogs [45],

1  
2  
3  
4  
5  
6  
7  
8  
9  
10  
11  
12  
13  
14  
15  
16  
17  
18  
19  
20  
21  
22  
23  
24  
25  
26  
27  
28  
29  
30  
31  
32  
33  
34  
35  
36  
37  
38  
39  
40  
41  
42  
43  
44  
45  
46  
47  
48  
49  
50  
51  
52  
53  
54  
55  
56  
57  
58  
59  
60  
61  
62  
63  
64  
65

---

419 chickens [8]. In particular, *GRIK2* was also found to play a crucial role during  
420 rabbit domestication [7].

421 Besides brain and nervous system related genes, we also identified  
422 several genes that play an important function in lipid and energy metabolism.  
423 For example, *PIK3C3* plays an important role in ATP binding but also regulates  
424 brain development and axons of cortical neurons [46-50]. *PNPLA8* is involved  
425 in facilitating lipid storage in adipocyte tissue energy mobilization and maintains  
426 mitochondrial integrity [51, 52], as well as plays a role in lipid metabolism  
427 associated with neurodegenerative diseases [53-55]. *PRKAR2B* is associated  
428 with body weight regulation, hyperphagia, and other energy metabolism [56,  
429 57].

430 Taken together, our results show that duck domestication was [a relatively](#)  
431 recent and complex process, and the genetic basis of domestication traits show  
432 many striking overlaps with other vertebrate domestication events.

## 433 **Methods**

### 434 Ethics statement

435 The entire procedure was carried out in strict accordance with the protocol  
436 approved by the Animal Welfare Committee of China Agricultural University  
437 (Permit Number: XK622).

---

1  
2  
3  
4  
5  
6  
7 438 Sample selection

10 439 78 ducks were chosen for sequencing, seven different populations of  
11  
12 440 domesticated ducks and two population of mallards from different geographic  
13  
14 441 regions. The domesticated ducks include three meat type populations *i.e.*,  
15  
16 442 Pekin duck (PK; n=8); Cherry Valley duck (CV; n=8); Maple Leaf duck (ML; n=8),  
17  
18 443 three egg type populations *i.e.*, Jin Ding duck (JD; n=8); Shao Xing duck (SX;  
19  
20 444 n=8); Shan Ma duck (SM; n=8), one egg and meat dual-purpose type (DP type)  
21  
22 445 population *i.e.*, Gao You duck (GY; n=8), and two wild populations come from  
23  
24 446 two different provinces in China with separated by nearly 2,000 km distance *i.e.*,  
25  
26 447 Mallard from Ningxia province (MDN; n=8); Mallard form Zhejiang province  
27  
28 448 (MDZ; n=14). The classification of production types follow the description of  
29  
30 449 Animal Genetic Resources in China Poultry [58]. PK, CV, and ML ducks  
31  
32 450 originated from Beijing; JD and SM ducks originated from Fujian province while  
33  
34 451 SX and GY ducks originated from Jiangsu province. Whole blood samples were  
35  
36 452 collected from brachial veins of ducks by standard venipuncture.  
37  
38  
39

40 453 In addition, 14 male ducks (MDNM, n=3; MDZM, n=4; PKM, n=1; CVM,  
41  
42 454 n=1; MLM, n=1; JDM, n=1; SMM, n=1; SXM, n=1; GYM, n=1) were chosen for  
43  
44 455 RNA-seq.  
45

46 456 Sequencing and mapping statistic of individual ducks in genome and  
47  
48 457 transcriptome analysis were detailed in supplementary files ([Supplemental](#)  
49  
50 458 [Table S1, S7](#)).  
51  
52  
53  
54  
55  
56  
57  
58  
59  
60  
61  
62  
63  
64  
65

---

## 459 Sequencing and library preparation

460 Genomic DNA was extracted using standard phenol/chloroform extraction  
461 method. For each sample, two paired-end libraries (500 bp) were constructed  
462 according to manufacturer protocols (Illumina), and sequenced on the Illumina  
463 Hiseq 2500 sequencing platform. From each populations, we sequenced seven  
464 samples at 5X depth and one at 10X coverage, except for the MDN population,  
465 where we sequenced seven individuals at 5X coverage and one at 20X  
466 coverage and the MDZ population, where we sequenced all individuals at 10X  
467 coverage. We generated a total of 628.37 Gb of paired-end reads of 100 bp (or  
468 150 bp; MDZ) length ([Supplemental Table S1](#)).

469 mRNA from brain, liver, and breast muscle of 14 individual ducks were  
470 extracted using standard trizol extraction methods. ~~For each samples, Two-two~~  
471 ~~paired-end libraries (500 bp) were constructed according to manufacturer~~  
472 ~~instruction (Illumina). All samples were sequenced by Illumina Hiseq 4000~~  
473 ~~sequencing platform with the coverage of 6X, with 32M paired-end 150 bp~~  
474 ~~mapped reads. We generated total of 278.62 Gb of paired-end reads of 150 bp~~  
475 ~~length (Supplemental Table S9).~~  
476 ~~per sample after QC (Supplemental Table S7).~~

## 477 Read alignment and variant calling

478 To avoid low quality reads, mainly the result of base-calling duplicates and  
479 adapter contamination, we filtered out sequences according to the default

1  
2  
3  
4  
5  
6  
7  
8  
9  
10  
11  
12  
13  
14  
15  
16  
17  
18  
19  
20  
21  
22  
23  
24  
25  
26  
27  
28  
29  
30  
31  
32  
33  
34  
35  
36  
37  
38  
39  
40  
41  
42  
43  
44  
45  
46  
47  
48  
49  
50  
51  
52  
53  
54  
55  
56  
57  
58  
59  
60  
61  
62  
63  
64  
65

---

480 parameters of NGS QC Toolkit [\(v2.3.3\)](#) [59]. Those paired reads which passed  
481 Illumina's quality control filter were aligned using BWA-MEM (v0.7.12) to  
482 version 1.0 of the *Anas platyrhynchos* genome (BGI\_duck\_1.0) [10]. Duplicate  
483 reads were removed from individual samples alignments using Picard tools  
484 MarkDuplicates, and reads were merged using MergeSamFiles  
485 (<http://broadinstitute.github.io/picard/>).

486 The Genome Analysis Toolkit (GATK, v3.5) RealignerTargetCreator and  
487 IndelRealigner protocol were used for global realignment of reads around  
488 INDELS before variant calling [60, 61]. SNPs and small indels (1-50 bp) were  
489 called used the GATK UnifiedGenotyper set for diploids with the parameter of  
490 minimum quality score of 20 for both mapped reads and bases to call variants,  
491 similarly to previous studies [62-66]. We filtered variants both per population  
492 and per individual using GATK according to the stringent filtering criteria. For  
493 SNPs of population filter: a.) QUAL > 30.0; b.) QD > 5.0; c.) FS < 60.0; d.) MQ >  
494 40.0; e.) MQRankSum > -12.5; f.) ReadPosRankSum > -8.0; Additionally, if  
495 there were more than 3 SNPs clustered in a 10 bp window, all three SNPs were  
496 considered as false positives and removed [67].

497 We used the following population criteria to identify INDELS: QUAL > 30.0,  
498 QD > 5.0, FS < 200.0, ReadPosRankSum > -20.0. Of individual filter, we also  
499 removed all INDELS and SNPs where the depth of derived variants was less  
500 than half the depth of the sequence. All SNPs and INDELS were assigned to  
501 specific genomic regions and genes using SnpEff [\(v4.0\)](#) [68] based on the



1  
2  
3  
4  
5  
6  
7 502 Ensembl duck annotations. After filtering a total of 36,107,949 SNPs and  
8  
9 503 3,082,731 INDELS were identified ([Supplemental Table S2](#)).

#### 10 11 12 504 SNP validation

13  
14  
15 505 In order to evaluate the reliability of our data, we compared our SNPs to  
16  
17 506 the duck dbSNP database deposited in the Genome Variation Map (GVM) at  
18  
19 507 the Big Data Center in the Beijing Institute of Genomics, Chinese Academy of  
20  
21 508 Science (<http://bigd.big.ac.cn/gvm/>). 7,908,722 SNPs were validated in the  
22  
23 509 duck dbSNP database, which covered 96.2% of the database ([Supplemental](#)  
24  
25 510 [Table S2](#)). For the 28,199,227 SNPs not confirmed by dbSNPs, 390 [randomly](#)  
26  
27 511 [selected](#) nucleotide sites were further validated [diagnostic PCR combined with](#)  
28  
29 512 [Sanger sequence method described in our previous research](#) [69]. [The result](#)  
30  
31 513 [showed by PCR with](#) 100% accuracy, indicating the high reliability of the called  
32  
33 514 SNP variation identified in this study.

#### 34 35 36 37 515 Population structure

38  
39  
40 516 We removed all SNPs with a minor allele frequency (MAF)  $\leq 0.1$  and kept  
41  
42 517 only SNPs that occurred in more than 90% of individuals. Vcf files were  
43  
44 518 converted to hapmap format with custom perl scripts, and to PLINK format file  
45  
46 519 by GLU v1.0b3 (<https://code.google.com/archive/p/glu-genetics/>) and PLINK  
47  
48 520 v1.90 [70, 71] when appropriate. We used GCTA [\(v1.25\)](#) [72] for Principle  
49  
50 521 Component Analysis (PCA), first by generating the genetic relationship matrix  
51  
52  
53  
54  
55  
56  
57  
58  
59  
60  
61  
62  
63  
64  
65

1  
2  
3  
4  
5  
6  
7 522 (GRM) ~~followed by~~from which the first 20 eigenvectors were extracted.  
8  
9 523 To estimate individual admixture assuming different numbers of clusters,  
10  
11 524 the population structure was investigated using FRAPPE v1.1 [21] base on all  
12  
13 525 high quality SNPs information, with a maximum likelihood method. We  
14  
15 526 increased the coancestry clusters spanning from 2 to 4 (Supplemental figure  
16  
17 527 S6), because there are four duck types (wild type, meat type, egg type, and  
18  
19 528 dual-purpose type) across the nine duck populations.~~We used all high quality~~  
20  
21 529 ~~SNPs to infer population structure using FRAPPE 1.1 [21], with 10,000~~  
22  
23  
24 530 iterations per run.

25  
26 531 A distance matrix was generated by calculating the pairwise allele sharing  
27  
28 532 distance for each pair of all high quality SNPs. Multiple alignment of the  
29  
30 533 sequences was performed with MUSCLE (v3.8) [73]. A neighbor-joining  
31  
32 534 maximum likelihood phylogenetic tree was constructed with the DNAML  
33  
34 535 program in the PHYLIP package v3.69 [74] and MEGA7 [75, 76]. All  
35  
36 536 implementation was performed according to the recommended manipulations  
37  
38 537 of SNPhylo [77].

### 42 538 Demographic history reconstruction

43  
44  
45 539 The demographic history of both wild and domesticated ducks was inferred  
46  
47 540 using a hidden Markov model approach as implemented in Pairwise  
48  
49 541 Sequentially Markovian Coalescence based on SNP distributions [22]. In order  
50  
51 542 to determine which PSMC (v0.6.5) settings were most appropriate for each  
52  
53  
54  
55  
56  
57  
58  
59  
60  
61  
62  
63  
64  
65

1  
2  
3  
4  
5  
6  
7  
8  
9  
10  
11  
12  
13  
14  
15  
16  
17  
18  
19  
20  
21  
22  
23  
24  
25  
26  
27  
28  
29  
30  
31  
32  
33  
34  
35  
36  
37  
38  
39  
40  
41  
42  
43  
44  
45  
46  
47  
48  
49  
50  
51  
52  
53  
54  
55  
56  
57  
58  
59  
60  
61  
62  
63  
64  
65

---

543 population, we reset the number of free atomic time intervals (-p option), upper  
544 limit of time to most recent common ancestor (TMRCA) (-t option), and initial  
545 value of  $r = \theta/\rho$  (-r option) according to previous research [25] and online  
546 suggestions by Li and Durbin (<https://github.com/lh3/psmc>). Based on  
547 estimated from the ~~zebra finch~~chicken genome, an average mutation rate ( $\mu$ )  
548 of  $21.951 \times 10^{-9}$  per base per generation and a generation time (g) of 1 year  
549 were used for analysis [78, 79] [80].

550 Three-population demographic inference was performed using a diffusion-  
551 based approach as implemented in the program *∂a∂i* (v1.7) [81]. To minimize  
552 potential effects of selection that could interfere with demographic inference,  
553 these analyses were performed using the subset of noncoding regions across  
554 the whole genome and spanning 750,939,264 bp in length. Noncoding SNPs  
555 were then thinned to 1% to alleviate potential linkage between the markers. The  
556 final dataset consisted of 95,181 SNPs with an average distance of 7,112 bp ( $\pm$   
557 18,810 bp) between neighbouring SNPs. To account for missing data, the  
558 folded allele frequency spectrum for the three populations (wild, meat and  
559 egg/dual purpose breeds) was projected down in *∂a∂i* to the projection that  
560 maximized the number of segregating SNPs, resulting in 92,966 SNPs.

561 We tested four different scenarios to reconstruct the demographic history  
562 of the domesticated breeds of mallards: simultaneous domestication of the  
563 meat and egg and dual purpose breeds (Model 1); a single domestication event  
564 followed by divergence of the meat and egg and dual purpose breeds (Model

1  
2  
3  
4  
5  
6  
7  
8  
9  
10  
11  
12  
13  
14  
15  
16  
17  
18  
19  
20  
21  
22  
23  
24  
25  
26  
27  
28  
29  
30  
31  
32  
33  
34  
35  
36  
37  
38  
39  
40  
41  
42  
43  
44  
45  
46  
47  
48  
49  
50  
51  
52  
53  
54  
55  
56  
57  
58  
59  
60  
61  
62  
63  
64  
65

---

565 2); two independent domestication events, with the meat type breed being  
566 domesticated first (Model 3); and two independent domestication events, with  
567 the egg and dual purpose breed being domesticated first (Model 4). Using the  
568 “backbone” of the best model, we then used a step-wise strategy to add  
569 parameters related with variation in population sizes and population growth,  
570 keeping a new parameter only if the Akaike information criterion (AIC) and log  
571 likelihood improved considerably over the previous model with less parameters.  
572 In cases where additional parameters resulted in negligibly improved AIC and  
573 likelihood, we retained the simpler, less parameterized model. Gene flow was  
574 modelled as continuous migration events after population divergence. Each  
575 model was run at least ten times from independent starting values to ensure  
576 convergence to the same parameter estimates. We rejected models where we  
577 failed to obtain convergence across the replicate runs. Scaled parameters for  
578 the best-supported model were transformed into real values using the same  
579 average mutation rate ( $\mu$ ) and ( $g$ ) as described above for the PSMC analysis.  
580 Parameter uncertainty was obtained using the Godambe Information Matrix  
581 (GIM) [82] from 100 non-parametric bootstraps.

582 Selective-sweep analysis

583 In order to define candidate regions having undergone directional selection  
584 during duck domestication we calculated the coefficient of nucleotide  
585 differentiation ( $F_{ST}$ ) between mallards and domesticated ducks described by

1  
2  
3  
4  
5  
6  
7  
8  
9  
10  
11  
12  
13  
14  
15  
16  
17  
18  
19  
20  
21  
22  
23  
24  
25  
26  
27  
28  
29  
30  
31  
32  
33  
34  
35  
36  
37  
38  
39  
40  
41  
42  
43  
44  
45  
46  
47  
48  
49  
50  
51  
52  
53  
54  
55  
56  
57  
58  
59  
60  
61  
62  
63  
64  
65

---

586 Weir & Cockerham [83]. We calculated the average  $F_{ST}$  in 10kb windows with  
587 a 5 kb shift for all seven domesticated duck populations combined, and two  
588 mallard populations combined. Only scaffolds longer than 10 kb, 2368 of 78488  
589 scaffolds, were chosen for the analysis. We transformed observed  $F_{ST}$  values  
590 to Z transformation ( $Z(F_{ST})$ ) with  $\mu = 0.1154$  and  $\sigma = 0.0678$  according to  
591 previously described methods [84].

592 To estimate levels of nucleotide diversity ( $\pi$ ) across all sampled  
593 populations we used the VCFtools software [\(v0.1.13\)](#) [85] to calculate  
594  $\theta\pi(\text{wild/domesticated})$  [86], computing the average difference per locus over  
595 each pair of accessions. As the measurement of  $F_{ST}$ , averaged  $\pi$  ratio  
596 ( $\theta\pi(\text{wild/domesticated})$ ) was calculated for each scaffold in 10kb sliding  
597 windows.

598 Functional classification of GO categories was performed in Database for  
599 Annotation, Visualization and Integrated Discovery (DAVID, ~~ver~~ 6.8) [87].  
600 Statistical significance was accessed by using a modified Fisher's exact test  
601 and Benjamini correction for multiple testing.

## 602 RNA-seq and data processing

603 To infer whether novel allelic variants located in the top 5%  $F_{ST}$  regions of  
604 genome comparison between wild mallards and domesticated ducks could also  
605 affecting gene expression, we compared gene expression in brain, liver and in  
606 breast muscle between wild mallards and domesticated ducks. To make our

Formatted: Subscript

1  
2  
3  
4  
5  
6  
7 607 result more universal, 7 male mallards and 7 male domesticated ducks were  
8  
9 608 choose for RNA-seq. All samples were individually sequenced by Illumina  
10  
11 609 Highseq 4000 sequencing platform.

12  
13  
14 610 For each sample, adapters and primers of paired end reads were removed  
15  
16 611 by NGSQC Tool kit (v2.3.3) [59]. For each paired end read pair, if one of two  
17  
18 612 reads had an average base quality less than 20 (PHRED quality score), then  
19  
20 613 both reads were removed. If one end of paired end read had percentage of high  
21  
22 614 quality base less than 70%, the two paired reads also removed. After that  
23  
24 615 Hhigh-quality reads were mapped to reference genome using STAR (v.2.5.3a)  
25  
26 616 [88]. The *featureCounts* function of the *Rsubread* (v.1.5.2) [89, 90] was used to  
27  
28 617 output the counts of reads aligning to each gene. We detected the differential  
29  
30 618 expression genes with edgeR (v3.6) [91-94] using a  $p_{adj} < 0.05$  threshold.

## 31 32 33 34 619 **Availability of supporting data and materials Data** 35 36 620 **Access**

37  
38  
39 621 The 78 ducks used in whole genome resequencing analysis and the 14  
40  
41 622 ducks used in RNA-seq analysis are accessible at NCBI BioProject  
42  
43 623 (<http://www.ncbi.nlm.nih.gov/bioproject>) under accession numbers  
44  
45 624 PRJNA419832 and PRJNA419583, respectively. The unassembled  
46  
47 625 sequencing reads of 78 ducks and RNA-seq reads of 14 ducks have been  
48  
49 626 deposited in NCBI Sequence Read Archive (SRA:  
50  
51 627 <http://www.ncbi.nlm.nih.gov/sra>) under accession numbers SRP125660 and  
52  
53  
54  
55  
56  
57  
58  
59  
60  
61  
62  
63  
64  
65

628 *SRP125529, respectively. All VCF files of SNPs and INDELs and other*  
629 *supporting data were submitted to GigaDB datavase.*

Formatted: Font: Italic

630 ~~All duck sequence data had been submitted to Genome Sequence Archive~~  
631 ~~(GSA) database of BIG Data Center in Beijing Institute of Genomics (BIGD)~~  
632 ~~with accession number of CRA000523.~~

### 633 Declarations**Acknowledgments**

#### 634 Funding

Formatted: Heading 3, Indent: First line: 0"

635 This work was supported by the earmarked fund for the Beijing Innovation  
636 Team of the Modern Agro-industry Technology Research System (BAIC04-  
637 2017), European Research Council (grant agreement 680951) and Wolfson  
638 Merit Award. We gratefully acknowledge our colleagues in the Poultry Team at  
639 the National Engineering Laboratory for Animal Breeding of China Agricultural  
640 University, for their assistance on sample collection and helpful comments on  
641 the manuscript.

#### 642 Authors' contributions

Formatted: Underline

Formatted: Heading 3

Formatted: Underline

643 Conceived and designed the experiments: Lujiang Qu. Wrote the paper:  
644 Zebin Zhang. Revised the paper: Lujiang Qu, Judith E Mank, Marcel van Tuinen.  
645 Analyzed the data: Zebin Zhang, Pedro Almeida, Qiong Wang, Yaxiong Jia.  
646 Performed the experiments: Zebin Zhang, Yaxiong Jia. Contributed  
647 reagents/materials: Zhihua Jiang, Yu Chen, Kai Zhan, Shuisheng Hou,

1  
2  
3  
4  
5  
6  
7 648 Zhengkui Zhou, Huifang Li, Fangxi Yang, ~~and~~ Yong He, [Zhonghua Ning, and](#)  
8  
9 649 [Ning Yang](#).

## 650 References

- 651 1. Li J and Zhang Y. Advances in research of the origin and  
652 domestication of domestic animals. *Biodiversity Science*. 2009;17 4:319-  
653 29.
- 654 2. Darwin C and Mayr E. On the origin of species by means of  
655 natural selection, or the preservation of favoured races in the struggle  
656 for life. John Murray, London. On the Origin of Species by Means of  
657 Natural Selection. 1859.
- 658 3. Chen C, Liu Z, Pan Q, Chen X, Wang H, Guo H, et al. Genomic  
659 Analyses Reveal Demographic History and Temperate Adaptation of the  
660 Newly Discovered Honey Bee Subspecies *Apis mellifera sinisxinyuan* n.  
661 ssp. *Mol Biol Evol*. 2016;33 5:1337-48. doi:10.1093/molbev/msw017.
- 662 4. Yang J, Li WR, Lv FH, He SG, Tian SL, Peng WF, et al. Whole-  
663 Genome Sequencing of Native Sheep Provides Insights into Rapid  
664 Adaptations to Extreme Environments. *Mol Biol Evol*. 2016;33 10:2576-  
665 92. doi:10.1093/molbev/msw129.
- 666 5. Li M, Tian S, Jin L, Zhou G, Li Y, Zhang Y, et al. Genomic  
667 analyses identify distinct patterns of selection in domesticated pigs and  
668 Tibetan wild boars. *Nat Genet*. 2013;45 12:1431-8. doi:10.1038/ng.2811.
- 669 6. Jiang Y, Xie M, Chen W, Talbot R, Maddox JF, Faraut T, et al.  
670 The sheep genome illuminates biology of the rumen and lipid  
671 metabolism. *Science*. 2014;344 6188:1168-73.  
672 doi:10.1126/science.1252806.
- 673 7. Carneiro M, Rubin CJ, Di Palma F, Albert FW, Alfoldi J, Barrio  
674 AM, et al. Rabbit genome analysis reveals a polygenic basis for  
675 phenotypic change during domestication. *Science*. 2014;345  
676 6200:1074-9. doi:10.1126/science.1253714.
- 677 8. Wang MS, Zhang RW, Su LY, Li Y, Peng MS, Liu HQ, et al.  
678 Positive selection rather than relaxation of functional constraint drives  
679 the evolution of vision during chicken domestication. *Cell Res*. 2016;26  
680 5:556-73. doi:10.1038/cr.2016.44.
- 681 9. Rubin CJ, Zody MC, Eriksson J, Meadows JR, Sherwood E,  
682 Webster MT, et al. Whole-genome resequencing reveals loci under  
683 selection during chicken domestication. *Nature*. 2010;464 7288:587-91.  
684 doi:10.1038/nature08832.
- 685 10. Huang Y, Li Y, Burt DW, Chen H, Zhang Y, Qian W, et al. The  
686 duck genome and transcriptome provide insight into an avian influenza  
687 virus reservoir species. *Nat Genet*. 2013;45 7:776-83.



1  
2  
3  
4  
5  
6  
7  
8  
9  
10  
11  
12  
13  
14  
15  
16  
17  
18  
19  
20  
21  
22  
23  
24  
25  
26  
27  
28  
29  
30  
31  
32  
33  
34  
35  
36  
37  
38  
39  
40  
41  
42  
43  
44  
45  
46  
47  
48  
49  
50  
51  
52  
53  
54  
55  
56  
57  
58  
59  
60  
61  
62  
63  
64  
65

---

doi:10.1038/ng.2657.

11. Zeuner FE. A history of domesticated animals. A history of domesticated animals. 1963.

12. Thomson SAL, Ornithologists' Union B and Thomson AL. A new dictionary of birds. Nelson London; 1964.

13. Mason IL and Mason IL. Evolution of domesticated animals. 1984.

14. Bray F and Needham J. Science and Civilization in China, vol. 6, part 1. Agriculture: Cambridge University Press, Cambridge, UK. 1984.

15. [Luff R. 2000. Ducks. In Cambridge World History of Food, ed. KF Kiple, KC Ornelas, pp. 517–24. Cambridge, UK: Cambridge University Press](#)~~Kiple KF. The Cambridge world history of food. Cambridge: Cambridge University Press; 2000.~~

16. Chang H. Conspectus of genetic resources of livestock. Chinese Agriculture Press, Beijing, China, 1995.

17. Miller DB. Social displays of Mallard Ducks (*Anas platyrhynchos*): effects of domestication. Journal of Comparative and Physiological Psychology. 1977;91 2:221.

18. Ebinger P. Domestication and plasticity of brain organization in mallards (*Anas platyrhynchos*). Brain, behavior and evolution. 1995;45 5:286-300.

19. Frahm H, Rehkämper G and Werner C. Brain alterations in crested versus non-crested breeds of domestic ducks (*Anas platyrhynchos* fd). Poultry science. 2001;80 9:1249-57.

20. Duggan BM, Hocking PM, Schwarz T and Clements DN. Differences in hindlimb morphology of ducks and chickens: effects of domestication and selection. Genetics Selection Evolution. 2015;47 1:88.

21. Tang H, Peng J, Wang P and Risch NJ. Estimation of individual admixture: analytical and study design considerations. Genet Epidemiol. 2005;28 4:289-301. doi:10.1002/gepi.20064.

22. Li H and Durbin R. Inference of human population history from individual whole-genome sequences. Nature. 2011;475 7357:493-6. doi:10.1038/nature10231.

23. Ehlers J and Gibbard PL. The extent and chronology of Cenozoic global glaciation. Quaternary International. 2007;164:6-20.

24. Williams MAJ, Dunkerley D, De Deckker P, Kershaw AP and Stokes T. Quaternary environments. Science Press; 1997.

25. Nadachowska-Brzyska K, Li C, Smeds L, Zhang G and Ellegren H. Temporal Dynamics of Avian Populations during Pleistocene Revealed by Whole-Genome Sequences. Curr Biol. 2015;25 10:1375-80. doi:10.1016/j.cub.2015.03.047.

26. Shapiro MD, Kronenberg Z, Li C, Domyan ET, Pan H, Campbell M, et al. Genomic diversity and evolution of the head crest in the rock pigeon. Science. 2013;339 6123:1063-7. doi:10.1126/science.1230422.

1  
2  
3  
4  
5  
6  
7  
8  
9  
10  
11  
12  
13  
14  
15  
16  
17  
18  
19  
20  
21  
22  
23  
24  
25  
26  
27  
28  
29  
30  
31  
32  
33  
34  
35  
36  
37  
38  
39  
40  
41  
42  
43  
44  
45  
46  
47  
48  
49  
50  
51  
52  
53  
54  
55  
56  
57  
58  
59  
60  
61  
62  
63  
64  
65

---

27. Price TD. Domesticated birds as a model for the genetics of speciation by sexual selection. *Genetica*. 2002;116 2-3:311-27. doi:Doi 10.1023/A:1021248913179.

28. Lorenzen ED, Nogués-Bravo D, Orlando L, Weinstock J, Binladen J, Marske KA, et al. Species-specific responses of Late Quaternary megafauna to climate and humans. *Nature*. 2011;479 7373:359-64.

29. Hewitt G. The genetic legacy of the Quaternary ice ages. *Nature*. 2000;405 6789:907-13.

30. Hewitt G. Genetic consequences of climatic oscillations in the Quaternary. *Philosophical Transactions of the Royal Society of London B: Biological Sciences*. 2004;359 1442:183-95.

31. Qiu Q, Wang L, Wang K, Yang Y, Ma T, Wang Z, et al. Yak whole-genome resequencing reveals domestication signatures and prehistoric population expansions. *Nature communications*. 2015;6:10283. doi:10.1038/ncomms10283.

32. Orlando L, Ginolhac A, Zhang G, Froese D, Albrechtsen A, Stiller M, et al. Recalibrating *Equus* evolution using the genome sequence of an early Middle Pleistocene horse. *Nature*. 2013;499 7456:74-8. doi:10.1038/nature12323.

33. Steingrimsson E, Copeland NG and Jenkins NA. Melanocytes and the microphthalmia transcription factor network. *Annual review of genetics*. 2004;38:365-411. doi:10.1146/annurev.genet.38.072902.092717.

34. Hallsson JH, Hafliadottir BS, Schepsky A, Arnheiter H and Steingrimsson E. Evolutionary sequence comparison of the *Mitf* gene reveals novel conserved domains. *Pigment cell research*. 2007;20 3:185-200. doi:10.1111/j.1600-0749.2007.00373.x.

35. Levy C, Khaled M and Fisher DE. MITF: master regulator of melanocyte development and melanoma oncogene. *Trends in molecular medicine*. 2006;12 9:406-14. doi:10.1016/j.molmed.2006.07.008.

36. Minvielle F, Bed'hom B, Coville JL, Ito S, Inoue-Murayama M and Gourichon D. The "silver" Japanese quail and the MITF gene: causal mutation, associated traits and homology with the "blue" chicken plumage. *BMC genetics*. 2010;11:15. doi:10.1186/1471-2156-11-15.

37. Karlsson EK, Baranowska I, Wade CM, Salmon Hillbertz NH, Zody MC, Anderson N, et al. Efficient mapping of mendelian traits in dogs through genome-wide association. *Nat Genet*. 2007;39 11:1321-8. doi:10.1038/ng.2007.10.

38. Li S, Wang C, Yu W, Zhao S and Gong Y. Identification of genes related to white and black plumage formation by RNA-Seq from white and black feather bulbs in ducks. *PLoS One*. 2012;7 5:e36592. doi:10.1371/journal.pone.0036592.

39. Sultana H, Seo D, Choi NR, Bhuiyan MSA, Lee SH, Heo KN,

1  
2  
3  
4  
5  
6  
7  
8  
9  
10  
11  
12  
13  
14  
15  
16  
17  
18  
19  
20  
21  
22  
23  
24  
25  
26  
27  
28  
29  
30  
31  
32  
33  
34  
35  
36  
37  
38  
39  
40  
41  
42  
43  
44  
45  
46  
47  
48  
49  
50  
51  
52  
53  
54  
55  
56  
57  
58  
59  
60  
61  
62  
63  
64  
65

---

et al. Identification of Polymorphisms in MITF and DCT Genes and their Associations with Plumage Colors in Asian Duck Breeds. *Asian-Australasian journal of animal sciences*. 2017; doi:10.5713/ajas.17.0298.

40. Eriksson M, Nilsson A, Samuelsson H, Samuelsson EB, Mo L, Akesson E, et al. On the role of NR3A in human NMDA receptors. *Physiology & behavior*. 2007;92 1-2:54-9. doi:10.1016/j.physbeh.2007.05.026.

41. Bauer PH, Muller S, Puzicha M, Pippig S, Obermaier B, Helmreich EJM, et al. Phosducin Is a Protein Kinase-a-Regulated G-Protein Regulator. *Nature*. 1992;358 6381:73-6. doi:Doi 10.1038/358073a0.

42. Sunayashiki-Kusuzaki K, Kikuchi T, Wawrousek EF and Shinohara T. Arrestin and phosducin are expressed in a small number of brain cells. *Brain research Molecular brain research*. 1997;52 1:112-20.

43. Mignon-Grasteau S, Boissy A, Bouix J, Faure J-M, Fisher AD, Hinch GN, et al. Genetics of adaptation and domestication in livestock. *Livestock Production Science*. 2005;93 1:3-14.

44. Dugatkin LA and Trut L. *How to Tame a Fox (and Build a Dog): Visionary Scientists and a Siberian Tale of Jump-Started Evolution*. University of Chicago Press; 2017.

45. Axelsson E, Ratnakumar A, Arendt ML, Maqbool K, Webster MT, Perloski M, et al. The genomic signature of dog domestication reveals adaptation to a starch-rich diet. *Nature*. 2013;495 7441:360-4. doi:10.1038/nature11837.

46. Volinia S, Dhand R, Vanhaesebroeck B, MacDougall L, Stein R, Zvelebil M, et al. A human phosphatidylinositol 3-kinase complex related to the yeast Vps34p-Vps15p protein sorting system. *The EMBO Journal*. 1995;14 14:3339.

47. Inaguma Y, Ito H, Iwamoto I, Matsumoto A, Yamagata T, Tabata H, et al. Morphological characterization of Class III phosphoinositide 3-kinase during mouse brain development. *Medical molecular morphology*. 2016;49 1:28-33. doi:10.1007/s00795-015-0116-1.

48. Stopkova P, Saito T, Papolos DF, Vevera J, Paclt I, Zukov I, et al. Identification of PIK3C3 promoter variant associated with bipolar disorder and schizophrenia. *Biol Psychiatry*. 2004;55 10:981-8. doi:10.1016/j.biopsych.2004.01.014.

49. Tang R, Zhao X, Fang C, Tang W, Huang K, Wang L, et al. Investigation of variants in the promoter region of PIK3C3 in schizophrenia. *Neuroscience letters*. 2008;437 1:42-4. doi:10.1016/j.neulet.2008.03.043.

50. Zhou X, Wang L, Hasegawa H, Amin P, Han B-X, Kaneko S, et al. Deletion of PIK3C3/Vps34 in sensory neurons causes rapid neurodegeneration by disrupting the endosomal but not the autophagic

1  
2  
3  
4  
5  
6  
7  
8  
9  
10  
11  
12  
13  
14  
15  
16  
17  
18  
19  
20  
21  
22  
23  
24  
25  
26  
27  
28  
29  
30  
31  
32  
33  
34  
35  
36  
37  
38  
39  
40  
41  
42  
43  
44  
45  
46  
47  
48  
49  
50  
51  
52  
53  
54  
55  
56  
57  
58  
59  
60  
61  
62  
63  
64  
65

---

pathway. *Proceedings of the National Academy of Sciences*. 2010;107:9424-9.

51. Wilson PA, Gardner SD, Lambie NM, Commans SA and Crowther DJ. Characterization of the human patatin-like phospholipase family. *Journal of lipid research*. 2006;47 9:1940-9.

52. Kienesberger PC, Oberer M, Lass A and Zechner R. Mammalian patatin domain containing proteins: a family with diverse lipolytic activities involved in multiple biological functions. *Journal of lipid research*. 2009;50 Supplement:S63-S8.

53. Tesson C, Nawara M, Salih MA, Rossignol R, Zaki MS, Al Balwi M, et al. Alteration of fatty-acid-metabolizing enzymes affects mitochondrial form and function in hereditary spastic paraplegia. *The American Journal of Human Genetics*. 2012;91 6:1051-64.

54. Schuurs-Hoeijmakers JH, Oh EC, Vissers LE, Swinkels ME, Gilissen C, Willemsen MA, et al. Recurrent de novo mutations in PACS1 cause defective cranial-neural-crest migration and define a recognizable intellectual-disability syndrome. *The American Journal of Human Genetics*. 2012;91 6:1122-7.

55. Martin E, Schüle R, Smets K, Rastetter A, Boukhris A, Loureiro JL, et al. Loss of function of glucocerebrosidase GBA2 is responsible for motor neuron defects in hereditary spastic paraplegia. *The American Journal of Human Genetics*. 2013;92 2:238-44.

56. Gagliano SA, Tiwari AK, Freeman N, Lieberman JA, Meltzer HY, Kennedy JL, et al. Protein kinase cAMP-dependent regulatory type II beta (PRKAR2B) gene variants in antipsychotic-induced weight gain. *Human psychopharmacology*. 2014;29 4:330-5. doi:10.1002/hup.2407.

57. Czyzyk TA, Sikorski MA, Yang L and McKnight GS. Disruption of the RII $\beta$  subunit of PKA reverses the obesity syndrome of agouti lethal yellow mice. *Proceedings of the National Academy of Sciences*. 2008;105 1:276-81.

58. Resources CNCoAG. *Animal genetic resources in China poultry*. Beijing: China Agriculture Press; 2010.

59. Patel RK and Jain M. NGS QC Toolkit: a toolkit for quality control of next generation sequencing data. *PLoS One*. 2012;7 2:e30619. doi:10.1371/journal.pone.0030619.

60. McKenna A, Hanna M, Banks E, Sivachenko A, Cibulskis K, Kernytsky A, et al. The Genome Analysis Toolkit: a MapReduce framework for analyzing next-generation DNA sequencing data. *Genome Res*. 2010;20 9:1297-303. doi:10.1101/gr.107524.110.

61. DePristo MA, Banks E, Poplin R, Garimella KV, Maguire JR, Hartl C, et al. A framework for variation discovery and genotyping using next-generation DNA sequencing data. *Nat Genet*. 2011;43 5:491-8. doi:10.1038/ng.806.

62. Yan Y, Yi G, Sun C, Qu L and Yang N. Genome-wide

1  
2  
3  
4  
5  
6  
7  
8  
9  
10  
11  
12  
13  
14  
15  
16  
17  
18  
19  
20  
21  
22  
23  
24  
25  
26  
27  
28  
29  
30  
31  
32  
33  
34  
35  
36  
37  
38  
39  
40  
41  
42  
43  
44  
45  
46  
47  
48  
49  
50  
51  
52  
53  
54  
55  
56  
57  
58  
59  
60  
61  
62  
63  
64  
65

---

864 characterization of insertion and deletion variation in chicken using next  
865 generation sequencing. *PLoS One*. 2014;9 8:e104652.  
866 doi:10.1371/journal.pone.0104652.

867 63. Qu Y, Tian S, Han N, Zhao H, Gao B, Fu J, et al. Genetic  
868 responses to seasonal variation in altitudinal stress: whole-genome  
869 resequencing of great tit in eastern Himalayas. *Sci Rep*. 2015;5:14256.  
870 doi:10.1038/srep14256.

871 64. Meyer RS, Choi JY, Sanches M, Plessis A, Flowers JM, Amas  
872 J, et al. Domestication history and geographical adaptation inferred from  
873 a SNP map of African rice. *Nat Genet*. 2016;48 9:1083-8.  
874 doi:10.1038/ng.3633.

875 65. Russell J, Mascher M, Dawson IK, Kyriakidis S, Calixto C,  
876 Freund F, et al. Exome sequencing of geographically diverse barley  
877 landraces and wild relatives gives insights into environmental adaptation.  
878 *Nat Genet*. 2016;48 9:1024-30. doi:10.1038/ng.3612.

879 66. Mascher M, Schuenemann VJ, Davidovich U, Marom N,  
880 Himmelbach A, Hubner S, et al. Genomic analysis of 6,000-year-old  
881 cultivated grain illuminates the domestication history of barley. *Nat Genet*.  
882 2016;48 9:1089-93. doi:10.1038/ng.3611.

883 67. Li H, Ruan J and Durbin R. Mapping short DNA sequencing  
884 reads and calling variants using mapping quality scores. *Genome Res*.  
885 2008;18 11:1851-8. doi:10.1101/gr.078212.108.

886 68. Cingolani P, Platts A, Wang LL, Coon M, Nguyen T, Wang L, et  
887 al. A program for annotating and predicting the effects of single  
888 nucleotide polymorphisms, SnpEff: SNPs in the genome of *Drosophila*  
889 *melanogaster* strain w1118; iso-2; iso-3. *Fly*. 2012;6 2:80-92.

890 69. Zhang Z, Nie C, Jia Y, Jiang R, Xia H, Lv X, et al. Parallel  
891 Evolution of Polydactyly Traits in Chinese and European Chickens. *PloS*  
892 *one*. 2016;11 2:e0149010.

893 70. Purcell S, Neale B, Todd-Brown K, Thomas L, Ferreira MA,  
894 Bender D, et al. PLINK: a tool set for whole-genome association and  
895 population-based linkage analyses. *The American Journal of Human*  
896 *Genetics*. 2007;81 3:559-75.

897 71. Chang CC, Chow CC, Tellier LC, Vattikuti S, Purcell SM and  
898 Lee JJ. Second-generation PLINK: rising to the challenge of larger and  
899 richer datasets. *Gigascience*. 2015;4 1:7.

900 72. Yang J, Lee SH, Goddard ME and Visscher PM. GCTA: a tool  
901 for genome-wide complex trait analysis. *The American Journal of*  
902 *Human Genetics*. 2011;88 1:76-82.

903 73. Edgar RC. MUSCLE: multiple sequence alignment with high  
904 accuracy and high throughput. *Nucleic acids research*. 2004;32 5:1792-  
905 7.

906 74. Plotree D and Plotgram D. PHYLIP-phylogeny inference  
907 package (version 3.2). *cladistics*. 1989;5 163:6.

1  
2  
3  
4  
5  
6  
7  
8  
9  
10  
11  
12  
13  
14  
15  
16  
17  
18  
19  
20  
21  
22  
23  
24  
25  
26  
27  
28  
29  
30  
31  
32  
33  
34  
35  
36  
37  
38  
39  
40  
41  
42  
43  
44  
45  
46  
47  
48  
49  
50  
51  
52  
53  
54  
55  
56  
57  
58  
59  
60  
61  
62  
63  
64  
65

---

75. Tamura K, Dudley J, Nei M and Kumar S. MEGA4: molecular evolutionary genetics analysis (MEGA) software version 4.0. *Molecular biology and evolution*. 2007;24 8:1596-9.

76. Kumar S, Stecher G and Tamura K. MEGA7: Molecular Evolutionary Genetics Analysis Version 7.0 for Bigger Datasets. *Mol Biol Evol*. 2016;33 7:1870-4. doi:10.1093/molbev/msw054.

77. Lee TH, Guo H, Wang X, Kim C and Paterson AH. SNPhylo: a pipeline to construct a phylogenetic tree from huge SNP data. *BMC genomics*. 2014;15 1:162. doi:10.1186/1471-2164-15-162.

78. Zhan X, Pan S, Wang J, Dixon A, He J, Muller MG, et al. Peregrine and saker falcon genome sequences provide insights into evolution of a predatory lifestyle. *Nat Genet*. 2013;45 5:563-6. doi:10.1038/ng.2588.

79. Balakrishnan CN and Edwards SV. Nucleotide variation, linkage disequilibrium and founder-facilitated speciation in wild populations of the zebra finch (*Taeniopygia guttata*). *Genetics*. 2009;181 2:645-60.

80. Nam K, Mugal C, Nabholz B, Schielzeth H, Wolf JB, Backström N, et al. Molecular evolution of genes in avian genomes. *Genome biology*. 2010;11 6:R68.

81. Gutenkunst RN, Hernandez RD, Williamson SH and Bustamante CD. Inferring the joint demographic history of multiple populations from multidimensional SNP frequency data. *PLoS genetics*. 2009;5 10:e1000695. doi:10.1371/journal.pgen.1000695.

82. Coffman AJ, Hsieh PH, Gravel S and Gutenkunst RN. Computationally Efficient Composite Likelihood Statistics for Demographic Inference. *Molecular Biology and Evolution*. 2016;33 2:591-3. doi:10.1093/molbev/msv255.

83. Weir BS and Cockerham CC. Estimating F-Statistics for the Analysis of Population-Structure. *Evolution*. 1984;38 6:1358-70. doi:10.2307/2408641.

84. Kreyszig E. *Advanced engineering mathematics*. John Wiley & Sons; 2007.

85. Danecek P, Auton A, Abecasis G, Albers CA, Banks E, DePristo MA, et al. The variant call format and VCFtools. *Bioinformatics*. 2011;27 15:2156-8.

86. Tajima F. Evolutionary relationship of DNA sequences in finite populations. *Genetics*. 1983;105 2:437-60.

87. Huang da W, Sherman BT and Lempicki RA. Systematic and integrative analysis of large gene lists using DAVID bioinformatics resources. *Nature protocols*. 2009;4 1:44-57. doi:10.1038/nprot.2008.211.

88. Dobin A, Davis CA, Schlesinger F, Drenkow J, Zaleski C, Jha S, et al. STAR: ultrafast universal RNA-seq aligner. *Bioinformatics*.

1  
2  
3  
4  
5  
6  
7  
8  
9  
10  
11  
12  
13  
14  
15  
16  
17  
18  
19  
20  
21  
22  
23  
24  
25  
26  
27  
28  
29  
30  
31  
32  
33  
34  
35  
36  
37  
38  
39  
40  
41  
42  
43  
44  
45  
46  
47  
48  
49  
50  
51  
52  
53  
54  
55  
56  
57  
58  
59  
60  
61  
62  
63  
64  
65

---

2013;29 1:15-21.

89. Liao Y, Smyth GK and Shi W. The Subread aligner: fast, accurate and scalable read mapping by seed-and-vote. *Nucleic acids research*. 2013;41 10:e108-e.

90. Liao Y, Smyth GK and Shi W. featureCounts: an efficient general purpose program for assigning sequence reads to genomic features. *Bioinformatics*. 2014;30 7:923-30. doi:10.1093/bioinformatics/btt656.

91. Robinson MD and Smyth GK. Moderated statistical tests for assessing differences in tag abundance. *Bioinformatics*. 2007;23 21:2881-7. doi:10.1093/bioinformatics/btm453.

92. Robinson MD, McCarthy DJ and Smyth GK. edgeR: a Bioconductor package for differential expression analysis of digital gene expression data. *Bioinformatics*. 2010;26 1:139-40. doi:10.1093/bioinformatics/btp616.

93. McCarthy DJ, Chen Y and Smyth GK. Differential expression analysis of multifactor RNA-Seq experiments with respect to biological variation. *Nucleic acids research*. 2012;40 10:4288-97. doi:10.1093/nar/gks042.

94. Lun AT, Chen Y and Smyth GK. It's DE-licious: a recipe for differential expression analyses of RNA-seq experiments using quasi-likelihood methods in edgeR. *Statistical Genomics: Methods and Protocols*. 2016:391-416.

Figure 1

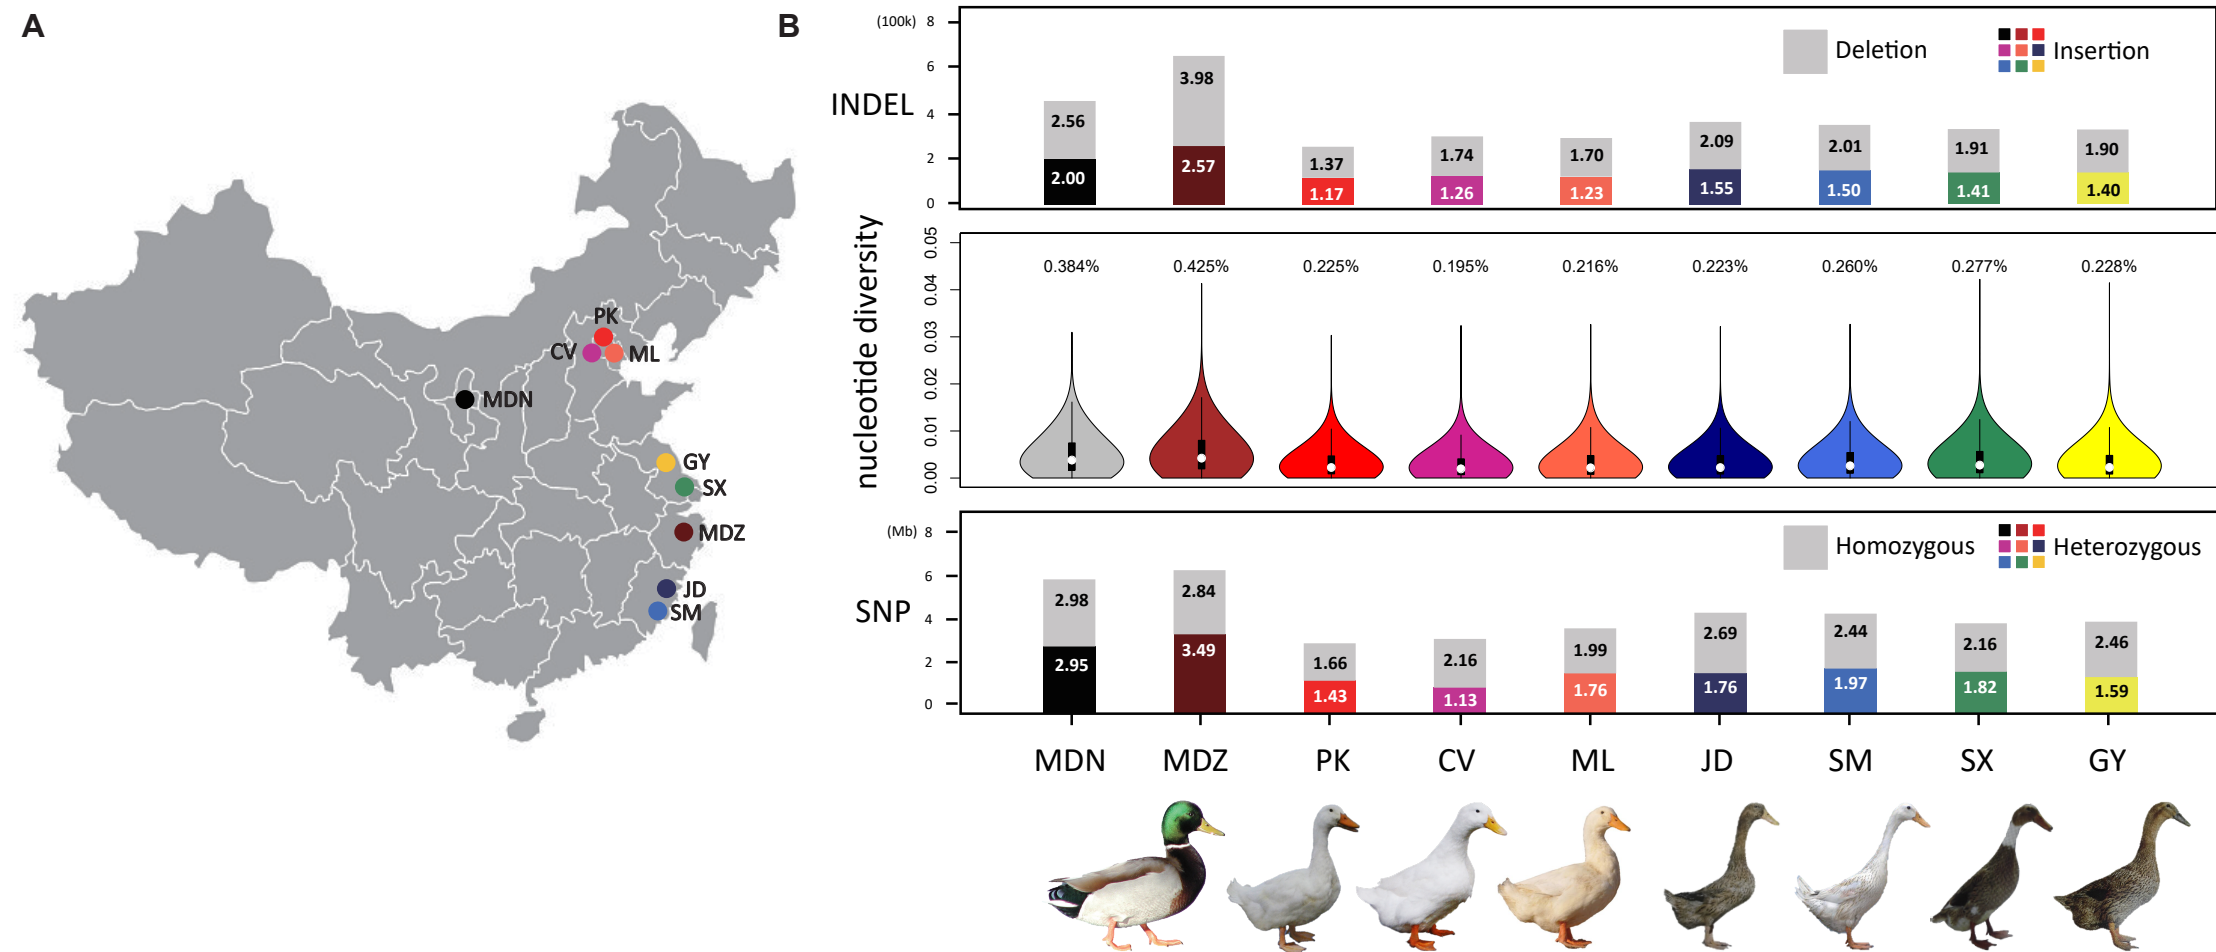



Figure 2

[Click here to download Figure Fig. 2.pdf](#)**A**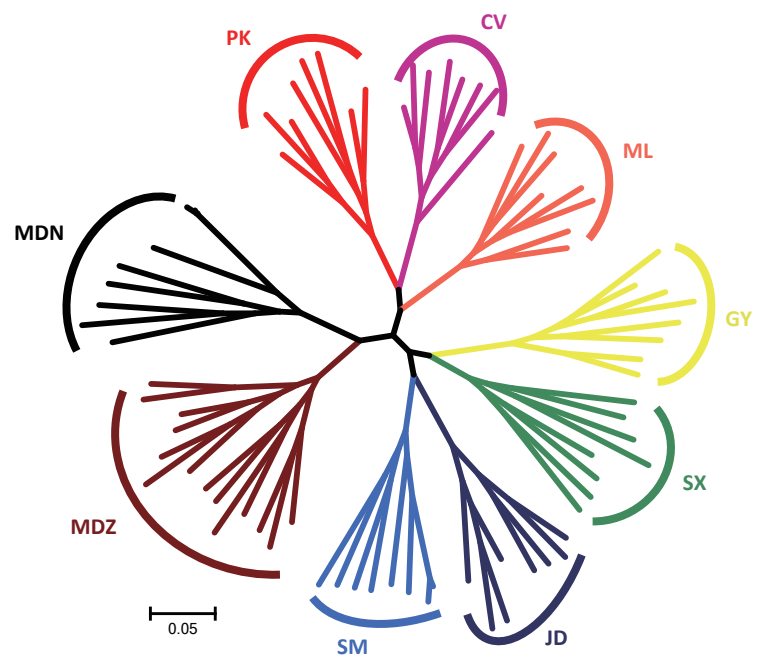**B**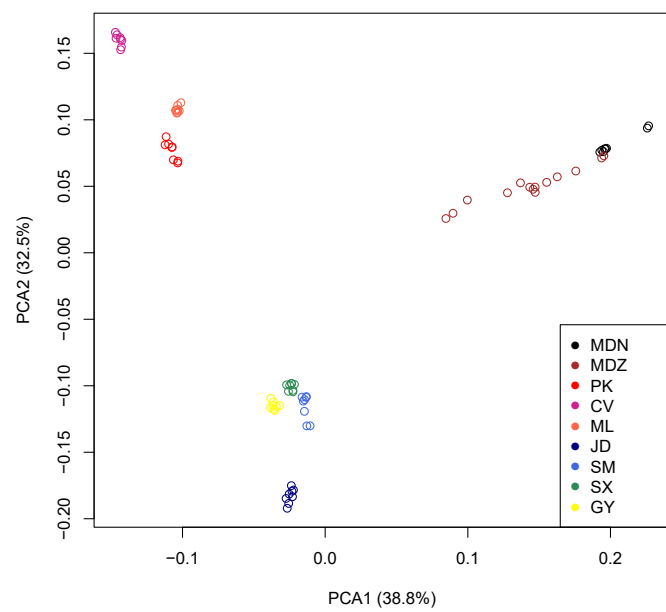**C**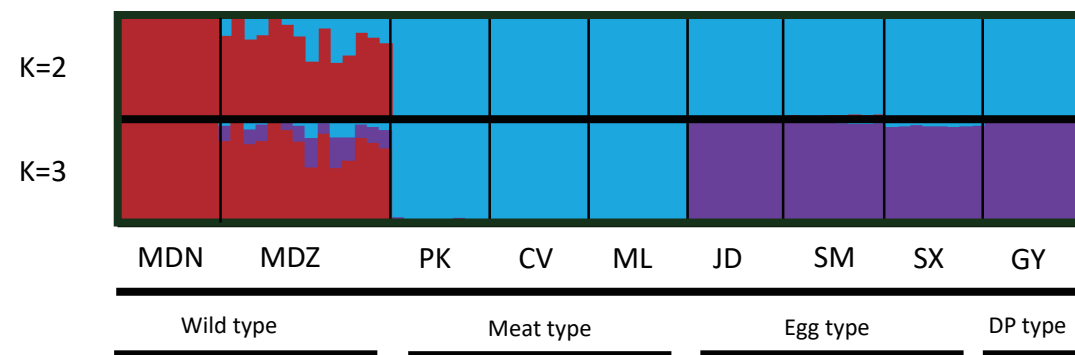**D**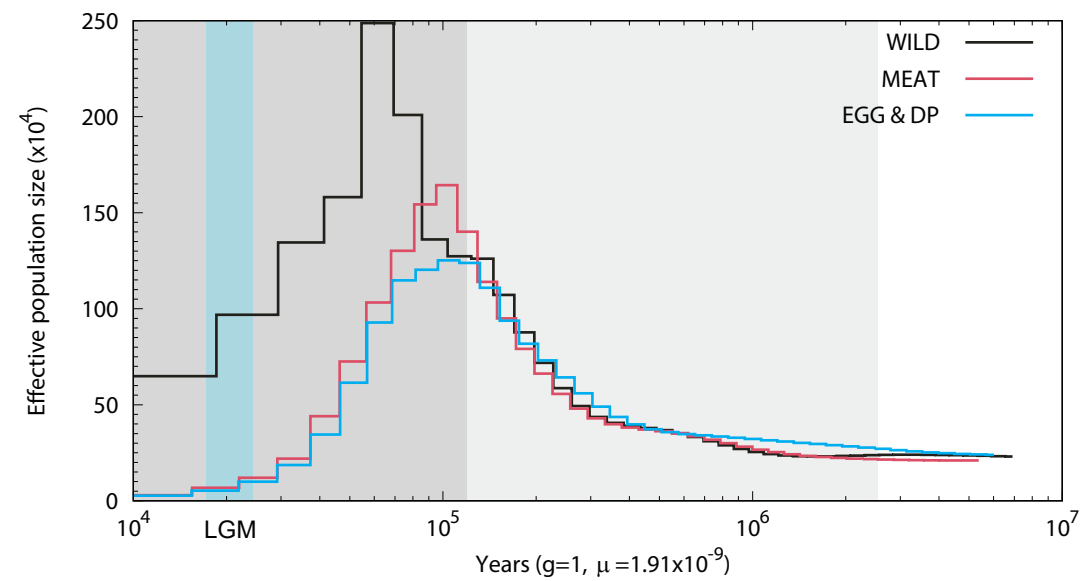

A

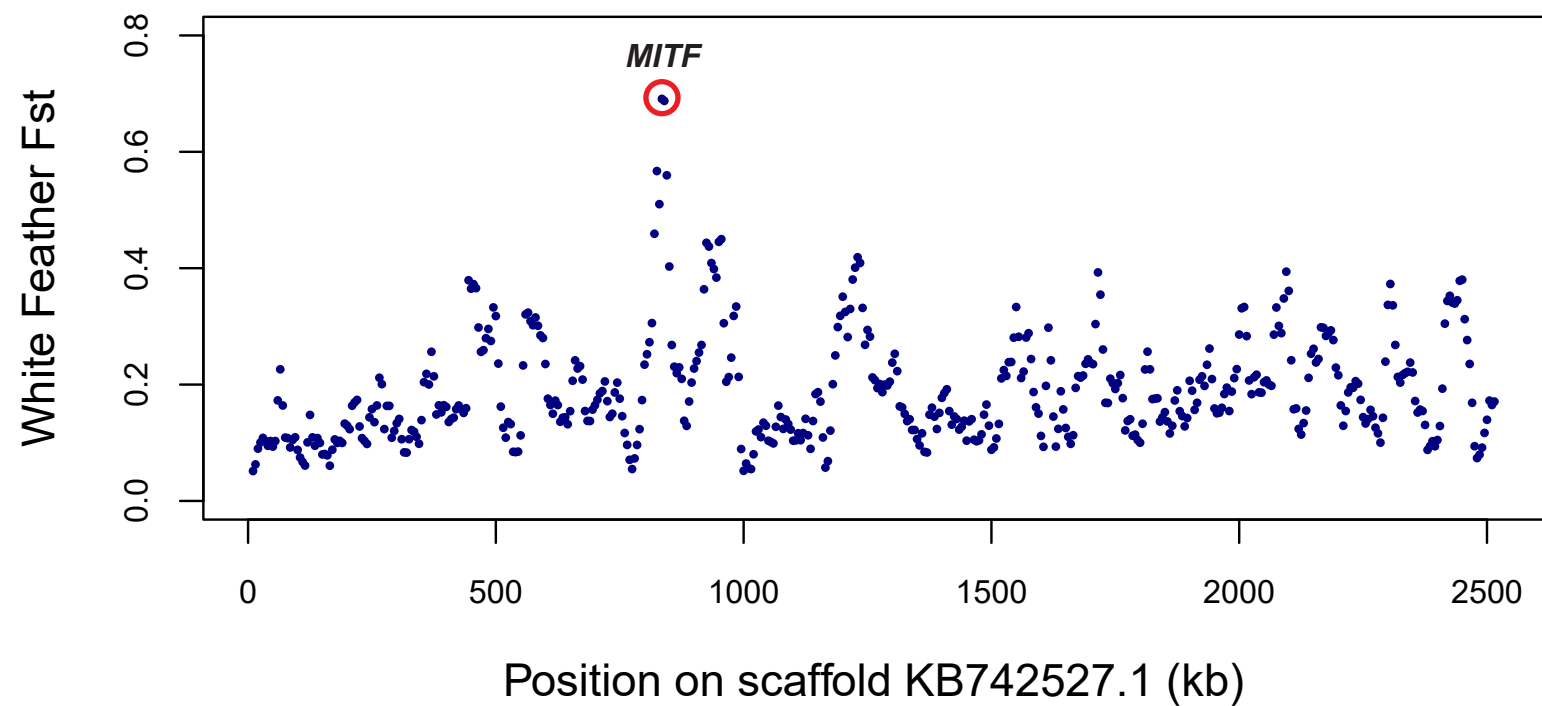

B

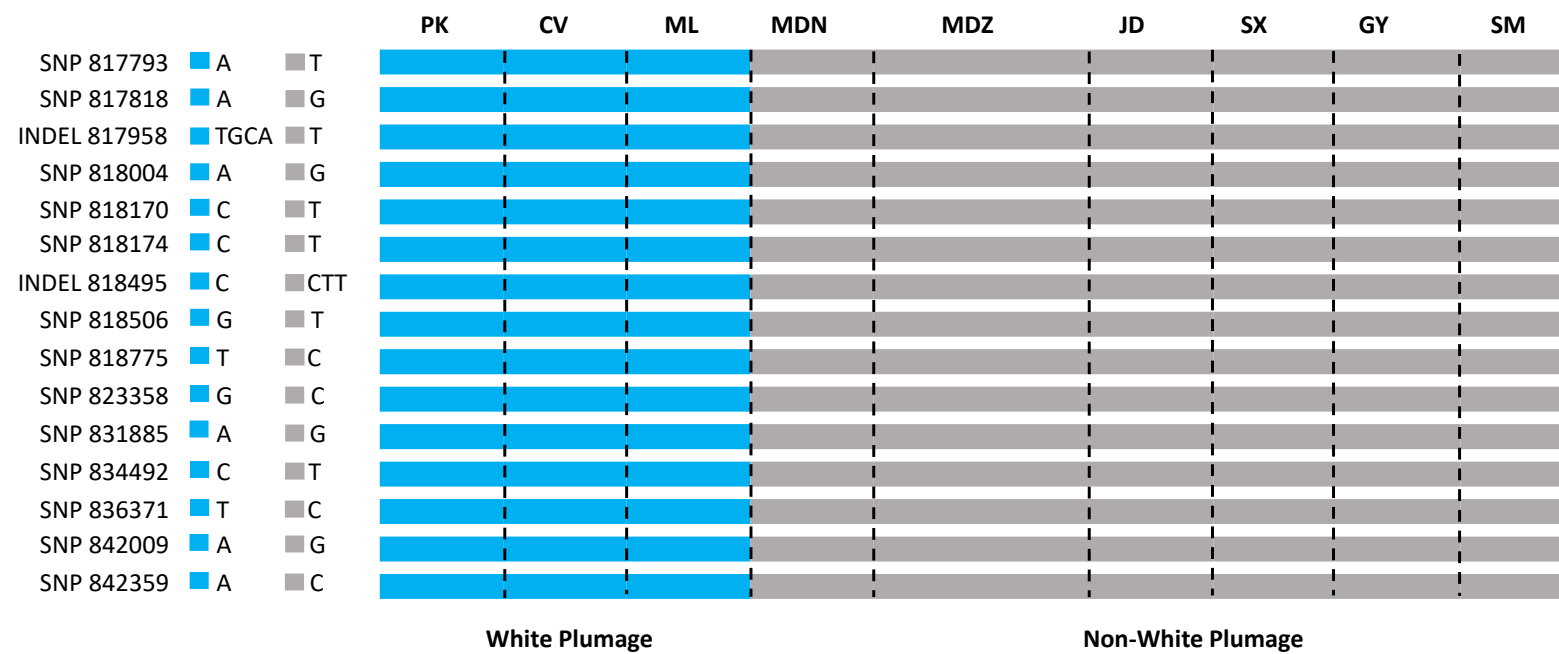



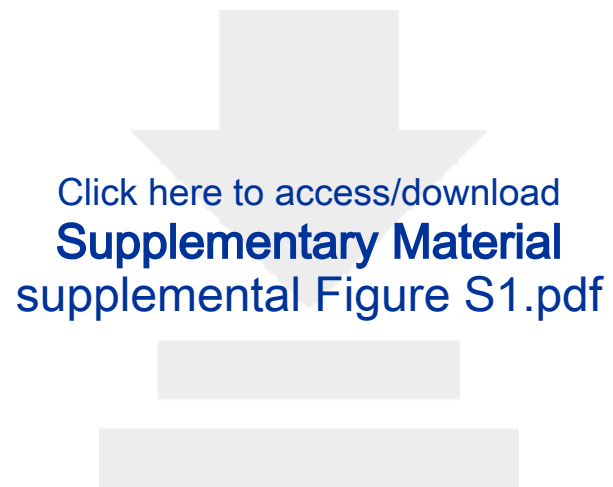

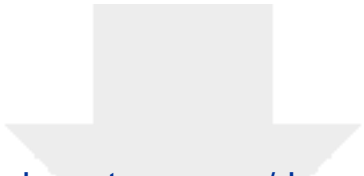

Click here to access/download  
**Supplementary Material**  
supplemental Figure S2.pdf



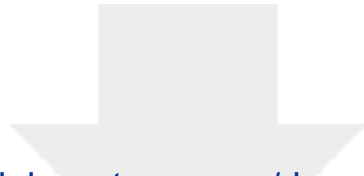

Click here to access/download  
**Supplementary Material**  
Supplemental Figure S3.pdf

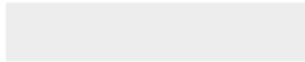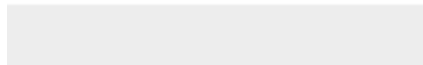



Click here to access/download  
**Supplementary Material**  
Supplemental Figure S4.pdf

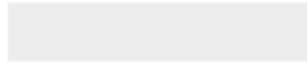



Click here to access/download  
**Supplementary Material**  
Supplemental Figure S5.pdf







Click here to access/download  
**Supplementary Material**  
Supplemental Figure S6.pdf

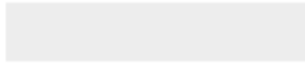

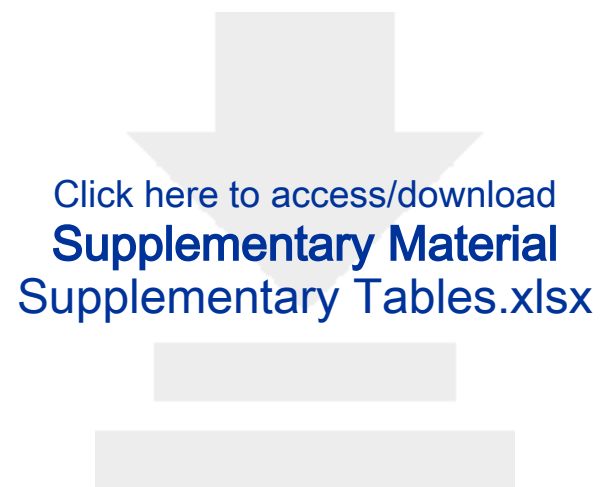

Dear Dr Zauner,

Many thanks for your positive comments about our manuscript, “Whole-genome resequencing reveals signatures of selection and timing of duck domestication” (manuscript number GIGA-D-17-00301). We also thank the reviewers for their thoughtful and constructive suggestions. We have addressed all these comments, detailed below, in our revised manuscript, which we hope is now suitable for publication in GigaScience.

Sincerely,

Lujiang Qu, Ph.D., on behalf of all co-authors.

Email: [quluj@163.com](mailto:quluj@163.com)

Department of Animal Genetics and Breeding, College of Animal Science and Technology, China Agricultural University, Beijing 100193, China

GIGA-D-17-00301

Whole-genome resequencing reveals signatures of selection and timing of duck domestication

Zebin Zhang; Yaxiong Jia; Pedro Almeida; Judith E Mank; Marcel van Tuinen; Qiong Wang; Zhihua Jiang; Yu Chen; Kai Zhan; Shuisheng Hou; Zhengkui Zhou; Huifang Li; Fangxi Yang; Yong He; Lujiang Qu, Ph.D.

GigaScience

Dear Prof. Qu,

Your manuscript "Whole-genome resequencing reveals signatures of selection and timing of duck domestication" (GIGA-D-17-00301) has been assessed by our reviewers. Although it is of interest, we are unable to consider it for publication in its current form. The reviewers have raised a number of points which we believe would improve the manuscript and may allow a revised version to be published in GigaScience.

Their reports are below.

**Comment:** All reviewers, but reviewer 2 in particular, provide some suggestions how the submission can be improved, for example by explaining the hypotheses more clearly in the introduction, and also by some additional analyses that may make the paper even stronger.

**Reply:** Many thanks for your comments. We have more clearly articulated our hypotheses in introduction section according to your and reviewer2's suggestion, please see [lines 75-79](#). Meanwhile, we have done the additional analyses according to your and reviewer2's suggestion, such as FRAPPE analyses by  $K=4$ , PSMC and  $\delta a\delta i$  analyses based on chicken mutation rate, global  $F_{ST}$  between each duck population, and  $F_{ST}$  recalculated by BayeScan, please see the specific reply to reviewer2.

**Comment:** An absolutely crucial point for publication in GigaScience is the remark #6 by reviewer 1, regarding sharing of data, code and protocols. GigaScience embraces the FAIR principles (<https://www.force11.org/group/fairgroup/fairprinciples>) and we ask our authors to document their work according to these principles, to allow full reproducibility and maximum reuse potential of the data, protocols and scripts.

**Please include supporting data such as custom scripts, full population genetic statistics and location of sweeps, any software output files, alignments, phylogenetic tree files etc.**

**Reply:** Thank you for this suggestion. The 78 ducks used in our whole genome resequencing analysis and the 14 ducks used in RNA-seq analysis have been submitted to NCBI BioProject (<http://www.ncbi.nlm.nih.gov/bioproject>) under accession numbers PRJNA419832 and PRJNA419583, respectively. The unassembled sequencing

reads of 78 ducks and RNA-seq reads of 14 ducks have been deposited in NCBI Sequence Read Archive (SRA: <http://www.ncbi.nlm.nih.gov/sra>) under accession numbers SRP125660 and SRP125529, respectively.

VCF files of SNPs and INDELS, as well as other supporting data, have been submitted to *GigaDB* as suggested. Please check the *GigaDB* servers.

Meanwhile, we also replied to reviewer 1 and have added these description to our current manuscript, please see [lines 618-628](#).

**To share your supporting data and scripts, our data curators will be able to help you to make them available via our data repository GigaDB. You can contact them via email: [database@gigasciencejournal.com](mailto:database@gigasciencejournal.com).**

**We are encouraging our submitters to make use of [protocols.io](http://protocols.io) , if you provide your methods (both wet-lab and dry-lab) in the SOP tab on the data spreadsheet we can import those into [protocols.io](http://protocols.io) on your behalf.**

**To share your raw sequencing data, please note that the BIG data repository is not part of the International Nucleotide Sequence Database Collaboration. Please choose a database that is an INSDC member (<http://www.insdc.org/>) and report accession numbers of the INSDC database in the manuscript.**

**If you are able to fully address points of our reviewers, we would encourage you to submit a revised manuscript to GigaScience. Once you have made the necessary corrections, please submit online at:**

<http://giga.edmgr.com/>

**If you have forgotten your username or password please use the "Send Login Details" link to get your login information. For security reasons, your password will be reset.**

**Please include a point-by-point within the 'Response to Reviewers' box in the submission system.**

**Please ensure you describe additional experiments that were carried out and include a detailed rebuttal of any criticisms or requested revisions that you disagreed with. Please also ensure that your revised manuscript conforms to the journal style, which can be found in the Instructions for Authors on the journal homepage.**

**The due date for submitting the revised version of your article is 20 Mar 2018.**

**I look forward to receiving your revised manuscript soon.**

**Best wishes,**

Hans Zauner  
GigaScience  
www.gigasciencejournal.com

### Reviewer reports:

#### Reviewer #1:

This paper reports sequencing, population history inferences, and selective sweep mapping in ducks using whole genome sequence data of multiple populations.

This is a good paper. It presents a large-scale population genomic dataset of ducks, uses standard methods that seem appropriate to the task, and it is well written.

Despite this, I have a few criticisms and questions:

**Comment:** 1. The paper repeatedly states that this is the first time *MITF* is associated with colour in the duck. This seems not to be entirely true (see Li et al 2012, <http://journals.plos.org/plosone/article?id=10.1371/journal.pone.0036592>, and Sultana et al 2017, <https://www.ncbi.nlm.nih.gov/pubmed/28823136>, but maybe the latter was not published when the manuscript was written). This study presents a whole-genome scan, which should provide stronger evidence than candidate gene associations. Comparing to other papers would be interesting. Can that help filter the candidate variants?

**Reply:** Thank you very much for your positive comments and for the two very helpful citations. Li *et al* (2012) identified that M isoform of *MITF* as expressed in black feather ducks, rather than white feather ducks or other colorful ducks. Sultana *et al* (2017) showed several SNPs and INDEL of *MITF* with different allele frequency in black and white ducks (table 2 - 5), but did not distinguish the correlation of *MITF* to white or other feather colors.

Due linkage effects, it is notoriously difficult to determine which variant is the real causative mutation of white plumage. Thus, we used the strictest variant filter criteria, namely those with fixed genotype differences in white and non-white ducks. We would very much like to implement the reviewer's suggestion of using the variants identified in these two previous studies, however the variants reported in Li *et al* (2012) and Sultana *et al* (2017) do not in fact pass our strict filter criteria.

We have however added these citations to our manuscript and revised the discussion accordingly (please see [line 390](#)). Most importantly, in order to distinguish our result from these previous studies, we revised our statement to say that "Our results show that white plumage in the duck is completely associated with selection at the *MITF* locus" in our current manuscript, please see [line 42 and line 246-247](#).

**Comment: 2.** It would be useful to see the population history results put more into context. In the light of what is known about duck breed history, is it reasonable that meat and egg type ducks split 2100 years ago? In the Discussion, this number is said to be "compatible with previous written records from 500 BC". The reference is to a book with no page numbers given. Would it be possible to be more specific? Given convergence problems with alternative models, how sure are you that the balance between migration and split time is right? I will admit that I am not really the person to evaluate the pairwise sequential Markov coalescent and  $\delta a\delta i$  results.

**Reply:** Many thanks for your comments. As we state in the manuscript, written records note domestic ducks in China as early as 500 BC. Due to the lack of archaeological evidence, we must focus on textual evidence, which indicates duck domestication occurred approximately 2,000 - 2,500 years ago. We have added these historical references regarding duck domestication to our current manuscript, please see [lines 63-71](#), and have added page numbers to the book citations, and below, please see [lines 697-700](#). Meanwhile, we also reran the PSMC and  $\delta a\delta i$  analyses based on the mutation rate estimate in chicken ( $1.91 \times 10^{-9}$  per base per generation, Nam et al. 2010). The chicken is phylogenetically closer to the duck than zebra finch, the source of our previous mutation rate estimate (Jarvis et al. 2014), however the mutation rate estimates in both chicken and duck are qualitatively similar. As a result, our results are similar, and indicate duck domestication occurred 2228 ( $\pm 441$ ) years ago. We revised the PSMC and  $\delta a\delta i$  results of our current manuscript, please see [Fig 2D, Table 1, and lines 204-219, 546-548](#).

It is true that the recent divergent time and the high level of diversity in both the domestic and wild populations makes it difficult to differentiate recent admixture from incomplete lineage sorting, however our genetic analysis is largely consistent with these written records, and does not indicate domestication much earlier than this time.

Luff R. 2000. Ducks. In *Cambridge World History of Food*, ed. KF Kiple, KC Ornelas, pp. 517–24. Cambridge, UK: Cambridge University Press

Jarvis, E. D., et al. (2014). "Whole-genome analyses resolve early branches in the tree of life of modern birds." *Science* 346(6215): 1320-1331.

Nam, K., et al. (2010). "Molecular evolution of genes in avian genomes." *Genome Biol* 11(6): R68.

**Comment: 3.** It is nice to see the high overlap between SNPs detected here and those in dbSNP. How many of the indels were already in databases? Was PCR validation only for SNPs? Given that indel detection is harder than SNP detection, are you convinced that the MITF indels are real?

**Reply:** Thank you for your comments. Initially, we validated our INDELS in dbINDEL, following a similar protocol to our SNP validation. However, there has been less focus on INDEL annotation in the database, which contains nearly 70 fold fewer INDELS than

we detected. As we used extremely strict filter criteria for INDELS as well as SNPs, we suggest that the difference in variation is due to our greater focus on INDEL annotation [please lines 497 – 500](#).

For the two MITF INDELS discussed, we used diagnostic PCR combined with Sanger sequencing to validate these sites in the 78 white and non-white ducks, as well as the first three SNPs (SNP817793, SNP817818, and SNP818004). The Sanger sequencing results of the three SNPs and INDEL817958 completely match our NGS analysis, please see [figure below](#) and [supplemental figure S5](#) in our current manuscript. For INDEL818495, we were unable to identify a suitable PCR primer. We have added this to our revised manuscript, please see [lines 247-253](#).

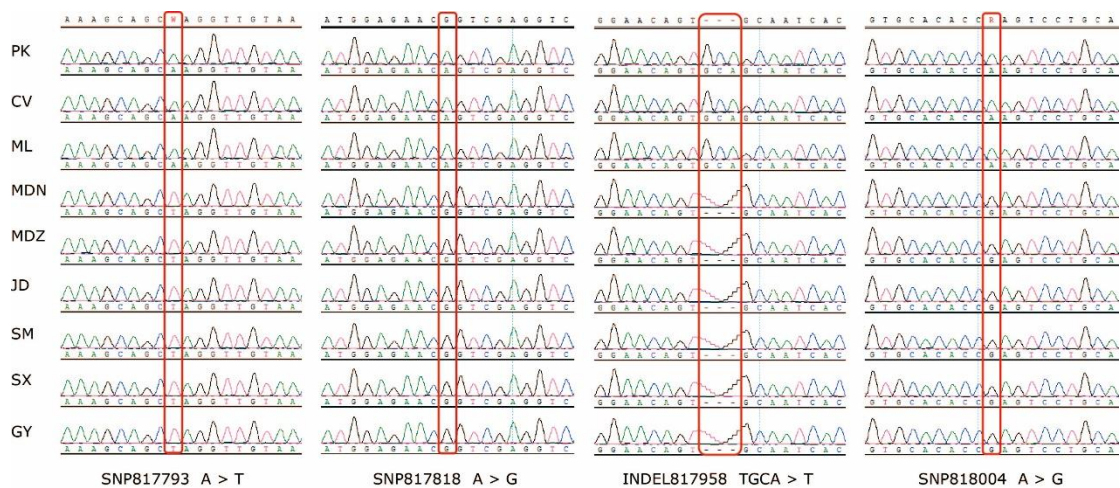

**Comment:** 4. A protocol for PCR validation seems to be missing (L440-442). It is hard to interpret the 100% accuracy in SNP validation when it is not clear how validation was performed or the accuracy evaluated.

**Reply:** Apologies, and many thanks for pointing this out. The SNP validation was performed by diagnostic PCR combined with Sanger sequencing method. We have added this description to our revised manuscript, [please see lines 510-513](#).

**Comment:** 5. The paper is well written, but the GigaScience author guidelines prescribe a somewhat different structure. It specifies an abstract divided into Background, Results, and Conclusions. The Data Description section is missing and other sections are have different names.

**Reply:** Thank you very much for this helpful suggestion. We had separated the abstract section accordingly, [please see lines 30-44](#). We have also added the Data Description section, [please see lines 86-109](#). We also renamed the Results as Analyses, please see [line 111](#), and revised the Availability of Supporting Data and Materials ([lines 618-628](#)), and the Declarations section ([lines 632, 633, and 641](#)).

**Comment:**6. It seems to me that the data and source code availability may not be in line with the journal policies. I am not certain how to interpret the policies, but the



editors will know better. Overall, the methods are described in text, but protocols and scripts are not provided. The raw sequence data is published in a repository, but little else, not even the full population genetic statistics or location of sweeps, as far as I can tell.

**Reply:** Apologies for our previous raw data and source code status. The data from the 78 ducks used in whole genome resequencing and the 14 ducks used in RNA-seq analysis have been submitted to NCBI BioProject (<http://www.ncbi.nlm.nih.gov/bioproject>) under accession numbers PRJNA419832 and PRJNA419583, respectively. The unassembled sequencing reads of 78 ducks and RNA-seq reads of 14 ducks have been deposited in the NCBI Sequence Read Archive (SRA: <http://www.ncbi.nlm.nih.gov/sra>) under accession numbers SRP125660 and SRP125529, respectively. VCF files of SNPs and INDELS, as well as other supporting data, have been submitted to *GigaDB* as you suggest, please check the *GigaDB* servers. And, we add these description to our current manuscript, please see [lines 618-628](#).

#### Minor comments

**Comment:** Line 35: The important numbers are the number of individuals sampled and the coverage per individual. Average coverage per breed seems less interesting.

**Reply:** Many thanks for your comment, we had revised this to per individual coverage information, please see [line 36](#).

**Comment:** Lines 97-101: What do the average numbers of variants detected per individual mean? Are they variants that differ from reference genome, heterozygous variants, or something else?

**Reply:** Many thanks for your questions. The number of variants between the reference genome and each individual are different, especially in wild mallard and domesticated ducks, (please see [supplementary table S2](#)). The average value is the mean variant count of an individual, which includes both heterozygous variants and homozygous variants.

**Comment:** Lines 243-250: Which GO terms were these, and how were they chosen? It seems odd to me to first select a subset of genes based on GO and then perform enrichment analysis on that set. Will this not bias the analysis?

**Reply:** Apologies for any confusion. In fact, we observed 292 genes in the top 5%  $F_{st}$  regions, please see [supplementary table S5](#). Our enrichment analysis is based on these 292 genes, and we identified a subset of GO terms for further analyses based on significant GO term P-values, please [see supplementary table S7](#). Moreover, we add the full GO terms to our current manuscript, please [see supplementary table S6](#).

**Comment:** Lines 393-400: Is there a reason for this mix of sequencing coverage?

**Reply:** We aimed to sequence each individual at 5X coverage. Additionally, in order to reduce the false negative rate of variants due to our strict filter criteria, we randomly selected one individual from each population for 10X coverage.

**Comment:** Lines 381-384: It is not clear where the ducks came from. How were they obtained?

**Reply:** Many thanks for your questions. PK and ML ducks were obtained from Institute of Pekin Duck with the help of Mr. Fangxi Yang, [please see author information section, lines 5 and 25](#). CV ducks were obtained from Cherry Valley farms Co. Ltd with the help of Dr. Yong He, [please see lines 5 and 26](#). The other domesticated ducks were obtained from different duck breeding farms under the help of Dr. Huifang Li, [please see lines 5 and 23](#).

**Comment:** Line 506: What tool was used for Fst? Also VCFtools?

**Reply:** Thanks you very much for your questions. The Fst was calculated by the formula described by Weir BS (1984) under our custom perl script. Our custom perl script have been submitted to *GigaDB* database.

Weir, B. S. and C. C. Cockerham (1984). "Estimating F-Statistics for the Analysis of Population-Structure." *Evolution* **38**(6): 1358-1370.

**Comment:** Figure 1b: The circos plot in Figure 1 looks impressive, but is impossible to read. What is it supposed to show?

**Reply:** Apologies for any problems with our figures. The complicated circos plot is the result of the many scaffolds (78,488) in the current duck reference genome. We have removed the circos plot from our current manuscript, please [see figure 1, and line 125-127](#) .

**Comment:** Throughout methods: Version numbers are missing for some softwares.

**Reply:** Apologies for this. We have added all this information to our current manuscript, such as NGS QC Toolkit v2.3.3 ([line 480](#)), SnpEff v4.0 ([line 501](#)), GCTA v1.25 ([line 520](#)), MUSCLE v3.8 ([line 532](#)), PSMC v0.6.5 ([line 541](#)), *daði* v1.7 ([line 550](#)), VCFtools v0.1.13 ([line 592](#)), and edgeR v3.6 ([line 617](#)).

**Reviewer #2:**

Zhang et al. sequenced whole genomes of 78 individuals of domesticated and wild

mallard populations. The authors find a complex history of domestication, with particular artificial selection of meat and egg production in domesticated lineages. Further, outlier analyses demonstrate that white plumage was the result of selection of MITF transcriptional factors. I believe that the authors are tackling an important question regarding variation between domesticates and wild populations, and with an extensive genomic dataset. However, I think the authors fall short in introducing the subject and discussing their results. Moreover, the manuscript requires editing prior to publication, particularly the introduction.

**Comment:** Introduction.

The introduction requires extensive editing. I would also encourage the authors to add another sentence as the relevance (the why) of looking for outliers between domesticated and wild stocks. What exactly are you trying to learn? Instead of results, I would like to see hypotheses regarding what the authors may expect when comparing the genomes of domesticated and wild populations.

**Reply:** Many thanks for your comments. The most important reason we identified outliers between wild and domesticated ducks was to identify putative sites associated with the genetic basis of phenotypic differences between wild and domestic populations. We have added this explanation to our manuscript, and have also extensively revised our introduction section according to your suggestions, please see lines 51-85.

We had two primary hypotheses regarding duck domestication given the deep divergence between meat and egg breeds. Were ducks domesticated once from wild mallards and subsequently selected for separate egg and meat traits, or were egg and meat populations domesticated in two independent events. We have added the hypotheses of duck domestication scenarios to introduction section, please see lines 75-79.

**Comment:** The whole first paragraph requires editing.

For example -- Line 50-52: Suggest change sentence to: "Mallards (*Anas platyrhynchos*) are the world's most widely distributed and agriculturally important waterfowl species, and are especially of economic importance in Asia [1]."

**Reply:** Many thanks for this suggestion. We had revised the sentence accordingly, please see lines 63-64. And we have also extensively revised the first paragraph as suggested, please see lines 52-71.

**Comment:** Results

1. Line 79 - is this 535 billion mappable reads per sample or across samples?

**Reply:** Apologies for any confusion. The 535 billion is the total mapped reads across samples. We have added this explanation to our revised manuscript, please see line

117.

**Comment: 2.** Lines 115-121- how did the authors pick the optimum K in FRAPPE analyses? Did the authors explore additional K values? Where separate analyses done within wild and domesticated populations? Please explain.

**Reply:** Many thanks for your comments. We analyzed the population structure with  $K=2, 3$  and  $4$  because there are four duck types across the nine duck populations, shown below, and explained in [lines 161-165](#). When  $K=4$ , a clear division was found between egg type ducks (JD, SM, and SX) and dual-purpose type ducks (GY) ([supplemental figure S6](#)). The most important reason we focused on  $K=3$  as the optimum value for further analysis is due to the results of both the phylogenetic and PCA analyses, which convergently showed the nine duck populations clustered into 3 major groups.

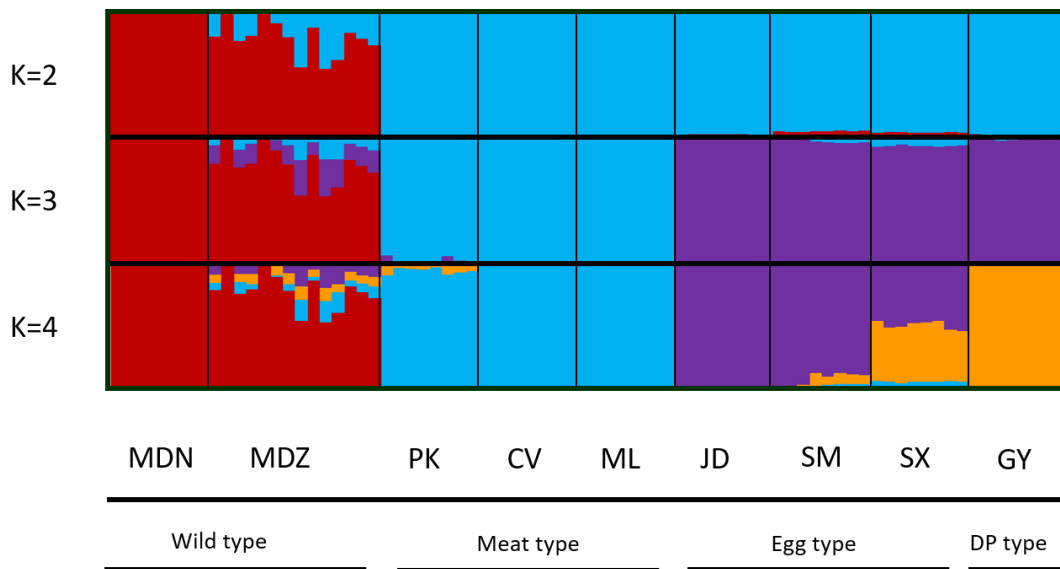

**Comment: 2a.** What do the authors make of domesticated admixture in wild populations? Is this hybridization, ancestry, a combination of both...? I would encourage the authors to explore this further as hybridization between domesticated and wild breeds is a serious concern for conservation of wild populations.

**Reply:** We agree with the reviewer that this is a very interesting area, and an area of great conservation importance. Unfortunately, given the recent domestication and high levels of diversity we observe, it is not in fact possible to accurately differentiate hybridization from incomplete lineage sorting with our current data, as complex models with these alternative scenarios failed to converge. We agree that this is an interesting area for further study, and have added this explanation to our current manuscript, please [see lines 377-381](#).

**Comment: 2b.** The PCA analyses seem to suggest that there is structure within wild

populations. Running a FRAPPE analyses on wild populations could help tease out whether they are 1 population and PCA analyses are just separating samples as there is so much variation.

**Reply:** Thank you very much for your comments. Of course, the PCA result showed there is a structure within wild populations, because the two wild populations come from two different provinces in China separated by nearly 2,000 km, (please [see line 446](#)). However, the PCA result also showed extensive overlap of these two wild populations, please [see fig 2B](#). Additionally, our FRAPPE analyses were based on all 78 duck individuals rather than pooled population information. Thus, we apologize if we have missed something intended by the reviewer, but we think the structural analysis suggested with recover the same result as our current analysis.

**Comment: 3. Lines 139-141 - consider revising the sentence into a more formal hypothesis. I would also like to see such hypotheses in the introduction.**

**Reply:** Thank you so much for your kind suggestion. We had two primary hypotheses regarding duck domestication given the deep divergence between meat and egg breeds. Were ducks domesticated once from wild mallards and subsequently selected for separate egg and meat traits, or were egg and meat populations domesticated in two independent events. We have added the hypotheses of duck domestication scenarios to introduction section, [please see lines 75-79](#).

**Comment: 4. Outside of outlier tests by calculating  $F_{ST}$ , the authors should consider more formal testing of these putative outliers (e.g., BayeScan).**

**Reply:** Thank you very much for this suggestion. We have recalculated our  $F_{ST}$  with BayeScan, and the results are statistically similar to our current analysis, based on Weir, B. S. (1984). Thus, we have kept our previous  $F_{ST}$  method in our revised manuscript, as this method is a classical and formal method for calculating  $F_{ST}$ , and has been widely implemented in many organisms, including rice (Meyer, R. S., et al. 2016), sheep (Yang, J., et al. 2016), dog (Gou, X., et al. 2014, Axelsson, E., et al. 2013), and pigeon (Shapiro, M. D., et al. 2013).

Weir, B. S. and C. C. Cockerham (1984). "Estimating F-Statistics for the Analysis of Population-Structure." Evolution 38(6): 1358-1370.

Meyer, R. S., et al. (2016). "Domestication history and geographical adaptation inferred from a SNP map of African rice." Nat Genet 48(9): 1083-1088.

Yang, J., et al. (2016). "Whole-Genome Sequencing of Native Sheep Provides Insights into Rapid Adaptations to Extreme Environments." Mol Biol Evol 33(10): 2576-2592.

Gou, X., et al. (2014). "Whole-genome sequencing of six dog breeds from continuous altitudes reveals adaptation to high-altitude hypoxia." Genome Res 24(8): 1308-1315.

Axelsson, E., et al. (2013). "The genomic signature of dog domestication reveals adaptation to a starch-rich diet." Nature 495(7441): 360-364.

Shapiro, M. D., et al. (2013). "Genomic diversity and evolution of the head crest in the rock pigeon." Science 339(6123): 1063-1067.

**Comment:** 5. Although I like the idea of RNA-seq data here. I think that this is largely overlooked in the manuscript and may detract from the main (genome) focus. I would encourage the authors to consider taking the RNA-seq out or sufficiently expanding on methods, reasoning, etc. of the RNA-seq data.

**Reply:** Thank you so much for your suggestion. We respectfully suggest that the RNA-seq is a key component of our manuscript, as it represents functional phenotypic differentiation of wild mallards and domesticated ducks, and helps connect the genomic variation to phenotypic differences. We have revised the methods and reasoning of including this data RNA-seq as suggested, please see lines 324-328, 470-475, and 603-615.

**Comment:** 6. I would like to see global  $F_{ST}$  estimates among breeds, wild locations

**Reply:** Many thanks for your comment. The global  $F_{ST}$  between were showed in below, and we also add this table to our current manuscript, please see lines 267-268, and supplemental table S4.

|     | MDN | MDZ      | PK       | CV       | ML       | JD       | SX       | SM       | GY       |
|-----|-----|----------|----------|----------|----------|----------|----------|----------|----------|
| MDN | -   | 1.00E-01 | 2.73E-01 | 3.13E-01 | 2.68E-01 | 2.73E-01 | 2.13E-01 | 2.30E-01 | 2.68E-01 |
| MDZ | -   | -        | 1.97E-01 | 2.40E-01 | 1.88E-01 | 1.99E-01 | 1.32E-01 | 1.54E-01 | 1.90E-01 |
| PK  | -   | -        | -        | 2.23E-01 | 1.84E-01 | 2.84E-01 | 1.96E-01 | 2.32E-01 | 2.57E-01 |
| CV  | -   | -        | -        | -        | 2.05E-01 | 3.41E-01 | 2.57E-01 | 2.90E-01 | 3.20E-01 |
| ML  | -   | -        | -        | -        | -        | 2.86E-01 | 2.07E-01 | 2.35E-01 | 2.72E-01 |
| JD  | -   | -        | -        | -        | -        | -        | 1.71E-01 | 1.97E-01 | 2.63E-01 |
| SX  | -   | -        | -        | -        | -        | -        | -        | 1.27E-01 | 1.52E-01 |
| SM  | -   | -        | -        | -        | -        | -        | -        | -        | 2.15E-01 |
| GY  | -   | -        | -        | -        | -        | -        | -        | -        | -        |

**Comment:** Discussion

I have no issues with the discussion and find it the best written. I think that a section on domesticate and wild hybridization may broaden the appeal of this paper.

**Reply:** Thanks for this suggestion. As we mentioned above, given the recent domestication and high levels of diversity we observe, it is not possible to accurately differentiate hybridization from incomplete lineage sorting with our current data, as complex models with these alternative scenarios failed to converge. We agree that this is an interesting area for further study, and have added material to the discussion as suggested, please see lines 377-381.

**Comment:** Methods

Please add additional information regarding FRAPPE analyses, K selection, etc.

**Reply:** Apologies for any omissions. We have added the method of FRAPPE analyses and K selection to our current manuscript, please see [lines 523-529](#).

**Comment: Figures**

**Figure 1: Consider re-moving statistical tests as these are presented in the results.**

**Reply:** Thanks for your helpful comment. We have moved the statistical tests to the results section as suggested, please see [lines 129-133, 144-147](#).

**Reviewer #3:**

**Overall a very nice paper, detailed comments to the authors:**

**Comment: Line 35: 45X coverage is misleading since the individual coverage was much smaller, please make a clearer statement here**

**Reply:** Thank you for this helpful suggestion. We have revised the population coverage information to individual information, please see [line 36](#).

**Comment: L40: Our FST analysis also indicates for the first time ...**

**Reply:** Thanks for this suggestion. We have revised our manuscript according to your suggestion, please see [lines 41-43](#).

**Comment: L52: of particular economic importance ...**

**Reply:** Many thanks for your comment. Done! Please see [line 65](#).

**Comment: L60-72: This is not introduction, but actually another summary, which I think is obsolete, a slightly more extended real introduction discussing background prior knowledge, and aims of the study, would be preferred**

**Reply:** Many thanks. We have moved this section of our previous version to Data Description according to GigaScience author guidelines and your suggestions, please [lines 91-109](#). Meanwhile, we have revised our Introduction section, please see [lines 52-85](#).

**Comment: Figure 1B: this panel is nice, but not very informative, what exact information is retrieved from the graph?**

**Reply:** Apologies for any problems with our figures. The complicated circos plot is the result of the many scaffolds (78,488) in the current duck reference genome. We have removed the circos plot from our current manuscript, please [see Figure 1](#).

**Comment: L95:** The number of deletions was higher than the number of insertions in all nine populations

**Reply:** Done! Please see [line 134](#).

**Comment: L105:** Move the sentence "Single base-pair INDELs were the predominant form, accounting for 38.63% of all detected INDELs (Supplemental Table S3)." before the sentence "Both the number of SNPs ..."

**Reply:** Thank you so much for your kind suggestion. We revised our manuscript accordingly, please see [lines 142-143](#).

**Comment: L111:** ... clustered together, the three ...

**Reply:** Done! Please see [line 155](#).

**Comment: L117:** Show figure for K=2?

**Reply:** Thanks for your question. Both K=2 and K=3 were showed in [fig 2C](#), please see [line 166](#).

**Comment: L155:** ... had the lowest Akaike Information Criteria (AIC) value, ...

**Reply:** Done! Please see [lines 200-201](#).

**Comment: L166:** ... are lower than in wild mallards ...

**Reply:** Done! Please see [line 213](#).

**Comment: Table 1:** is it possible to report standard errors or confidence intervals of the reported estimates?

**Reply:** Many thanks for your question. To answer the reviewer's question we added 95% confidence intervals to all estimates. We reanalyzed the demographic history of duck domestication based on mutation rates of both zebra finch and chicken. Using the mutation rate of zebra finch (Jarvis et al. 2014), the time of duck domestication is estimated at 2,128 (+- 421) years ago. With estimates of mutation rate from chicken (Nam et al. 2010), we estimate domestication 2,228 (+- 441) years ago. Considering the genetic relationship of duck to chicken is much closer than to zebra finch (Jarvis, E. D., et al. 2014), we revised the PSMC and  $\delta a \delta i$  results of our current manuscript, please see [Fig 2D, Table 1, and lines 203-211, 547-549](#).

**Comment: L197:** ... white plumage phenotype suggesting a causative mutation.



Our result indicates for the first time the duck white plumage associated with selection at ...

**Reply:** Done! Please see [lines 245-247](#).

**Comment:** L213: of 10kb size.

**Reply:** Done! Please see [line 267](#).

**Comment:** L224: "... scaffolds longer than 10-kb by 10-kb windows with 5-kb steps." This is not clear to me, please describe better.

**Reply:** Apologies for any confusion. In our study, both  $F_{ST}$  and  $\pi$  were calculated for each 10kb size window, with 5kb size steps. However, of the 78,488 scaffolds in the duck reference genome, there are many scaffolds < 10kb. These short scaffolds were removed, and we only calculated  $F_{ST}$  for scaffolds > 10kb. We have added this to our revised manuscript, please see [lines 279-281](#).

**Comment:** L237 was shown

**Reply:** Done! Please see [lines 293-294](#).

**Comment:** L240 level differs between domesticated and wild duck.

**Reply:** Done! Please see [line 296](#).

**Comment:** L245 I understand that you limited the GO analysis to certain processes, what happened if you included other processes as well?

**Reply:** Many thanks for this suggestion. In this study, all 292 genes located in the 5%  $F_{ST}$  regions ([supplementary table S5](#)) were used for the GO analysis, resulting in a total of 57 GO enrichment terms, which have now all been added to our current manuscript, please see [lines 300-301](#), and [supplementary table S6](#). This high number of GO terms presents a hopelessly difficult and complicated analyses, therefore we selected a subset of GO terms for further analysis based on P-value ([supplementary table S7](#)) combined the phenotypic differences between wild mallard and domestic duck. We do agree with the reviewer that a more inclusive analysis would be preferable, but the large number of GO terms makes it impossible to obtain meaningful results.

**Comment:** L252 identified as being under positive selection

**Reply:** Corrected! Please see [line 311](#).

**Comment:** L258 Is "neuronal genes" the right term?

**Reply:** Apologies for any confusion. “Neuronal genes” is not in fact a GO term, rather a simplification of “25 neuro-synapse-axon genes” in [line 310](#). To be more understandable, we have removed this simplification in our revision, please see [line 317](#).

**Comment:** L260 fatty acid

**Reply:** Apologies and corrected! Please see [line 319](#).

**Comment:** L269 and no gene in breast muscle

**Reply:** Done! Please see [line 329](#).

**Comment:** L273 The results suggest that the PDC gene is of substantial functional importance in phenotypic differentiation among wild and domestic ducks.

**Reply:** Many thanks. We have revised this sentence according to your suggestion, please see [lines 333-335](#).

**Comment:** L289 catalogued 36.1M SNPs and 3.1M INDELS,

**Reply:** Corrected! Please see [line 349](#).

**Comment:** L333 ... showed particularly strong signs of selective sweep s presumably associated with domestication.

**Reply:** We have corrected our manuscript according to your suggestion, please see [lines 398-399](#).

**Comment:** L340 brain and liver of domesticated ducks compared to ...

**Reply:** Corrected! Please see [line 405](#).

**Comment:** L351 differential selection? Do you mean directional selection?

**Reply:** Apologies for any confusion. We also revised our current manuscript, please see [lines 416-418](#).

**Comment:** L362 Taken together, our results show that duck domestication was a relatively recent and ...

**Reply:** We have corrected our manuscript according to your suggestion, please see [line 430](#).

**Comment:** L440 From the 28,199,227 SNPs not confirmed by dbSNPs, 390 randomly chosen (?) nucleotide sites

**Reply:** Many thanks for your question. Of course, all nucleotide sites were randomly selected. We have added this explain to our current manuscript, please see [lines 510-513](#).

**Comment:** L448 Principal Component Analysis (PCA), first by generating the genetic relationship matrix (GRM) from which the first 20 eigenvectors were extracted.

**Reply:** We have corrected our manuscript according to your suggestion, please see [line 520-522](#).

--

Please also take a moment to check our website at <http://giga.edmgr.com/l.asp?i=25723&l=YHKU51UQ> for any additional comments that were saved as attachments. Please note that as GigaScience has a policy of open peer review, you will be able to see the names of the reviewers.
